# Supplementary material
Source: MDPI journal article supplement (https://www.mdpi.com/2218-2004/10/2/52)
Supplement: s1 [file s1]

**List of main publications in which the results were obtained using the ATOM program system.**

**1. Monographs**

| №<br>п/п | Authors                                                                  | Title                                                                                                                                                                                | Type           | Name of publishers or<br>title of journal (year,<br>volume, page)                    | Num<br>ber of<br>pages |
|----------|--------------------------------------------------------------------------|--------------------------------------------------------------------------------------------------------------------------------------------------------------------------------------|----------------|--------------------------------------------------------------------------------------|------------------------|
| 1.       | M. Ya. Amusia                                                            | Many-Particle Effects in Atomic Electron Shells                                                                                                                                      | Monog<br>raphy | A. F. Ioffe Physical-<br>Technical Institute, USSR<br>Acad. Sci., Leningrad,<br>1968 | 144                    |
| 2.       | M. Ya. Amusia,<br>L. V. Chernysheva                                      | Automatic system of<br>atomic structure<br>investigations (in Russian,<br>Автоматизированная<br>система исследования<br>структуры атомов)                                            | Monog<br>raph  | «Nauka», Leningrag,<br>1983                                                          | 180                    |
| 3.       | М. Я. Амусья                                                             | Atomic Photoeffect (in<br>Russian, Атомный<br>фотоэффект)                                                                                                                            | Monog<br>raph  | «Nauka», Moscow, 1987                                                                | 272                    |
| 4.       | M. Ya. Amusia                                                            | Atomic Photoeffect                                                                                                                                                                   | Monog<br>raph  | Plenum Press, New-<br>York-London, 1990                                              | 303                    |
| 5.       | M. Ya. Amusia,<br>L. V. Chernysheva                                      | Computation of atomic<br>processes                                                                                                                                                   | Monog<br>raph  | Institute of physics<br>Publishing, Bristol and<br>Philadelphia, 1997                | 253                    |
| 6.       | M. Ya. Amusia,<br>V. K. Ivanov,<br>N. A. Cherepkov,<br>L. V. Chernysheva | Theory of multielectron<br>effects in atomic processes<br>(in Russian, Теория<br>многоэлектронных<br>эффектов в атомных<br>процессах)                                                | Monog<br>raph  | Ioffe Institute, St.<br>Petersburg, 2001                                             | 92                     |
| 7.       | M. Ya. Amusia,<br>V. K. Ivanov,<br>N. A. Cherepkov,<br>L. V. Chernysheva | Processes in many-<br>electron atoms<br>(in Russian, Процессы в<br>многоэлектронных<br>атомах)                                                                                       | Monog<br>raph  | «Nauka», St. Petersburg,<br>2006                                                     | 325                    |
| 8.       | M. Ya. Amusia,<br>L. V. Chernysheva,<br>V. G. Yarzhevsky                 | Photon absorption,<br>electron scattering,<br>vacancy decay (atomic<br>data)<br>(in Russian: Поглощение<br>фотонов, рассеяние<br>электронов, распад<br>вакансий (атомные<br>данные)) | Monog<br>raph  | «Nauka», St. Petersburg,<br>2010.                                                    | 313                    |
| 9.       | M. Ya. Amusia,<br>L. V. Chernysheva,<br>V. G. Yarzhevsky                 | Handbook of theoretical<br>Atomic Physics, Data for<br>photon absorption,<br>electron scattering,<br>vacancies decay                                                                 | Monog<br>raph  | Springer, Berlin, 2012                                                               | 806                    |

|     |                                                     |                                                                                                                                                                                  |           |                                                                          |     |
|-----|-----------------------------------------------------|----------------------------------------------------------------------------------------------------------------------------------------------------------------------------------|-----------|--------------------------------------------------------------------------|-----|
| 10. | V. K. Ivanov,<br>A. N. Ipatov,<br>R. G. Poloskov    | Quantum many-body theory<br>(in Russian, Квантовая теория многих тел)                                                                                                            | Tutorial. | Polytechnic University Publishing House, St. Petersburg 2013.            | 177 |
| 11. | M. Ya. Amusia,<br>L. V. Chernysheva,<br>S.K.Semenov | ATOM-M. Algorithms and programs for the study of atomic and molecular processes<br>(in Russian, АТОМ-М. Алгоритмы и программы для исследования атомных и молекулярных процессов) | Monograph | «Science», St. Petersburg, 2016.                                         | 545 |
| 12. | M. Ya. Amusia,<br>L. V. Chernysheva                 | Computation of Atomic and Molecular Processes: Introducing the ATOM-M Software Suite.                                                                                            | Monograph | Springer Series on Atomic, Optical, and Plasma Physics. Volume 117, 2021 | 456 |

## 2. Published articles, book chapters, reports and texts, as well as fundamentally important preprints.

| № п/п | Authors                                                                    | Title                                                                                                  | Type  | Name of publishers or title of journal (year, volume, page)                                      | Number of pages |
|-------|----------------------------------------------------------------------------|--------------------------------------------------------------------------------------------------------|-------|--------------------------------------------------------------------------------------------------|-----------------|
| 13.   | M. Ya. Amusia,<br>M. P. Kazachkov                                          | On the Double Ionization Mechanism                                                                     | Paper | Phys. Let. A, <b>28</b> , 1, p. 27, 1968                                                         |                 |
| 14.   | M. Ya. Amusia,<br>N. A. Cherepkov,<br>L. V. Chernysheva ,<br>S. I. Sheftel | Ar Photoionization Cross-Section Calculation in the Hartree-Fock Approximation                         | Paper | J. Exp. Theor. Phys. (USSR Acad. Sci.), <b>6</b> , p. 1897, 1969                                 |                 |
| 15.   | M. Ya. Amusia,<br>N. A. Cherepkov,<br>L. V.Chernysheva,<br>S. I. Sheftel   | On Atomic Photoionization Cross Section Calculation                                                    | Paper | Phys. Let. A, <b>28</b> , 11, p. 726-727, 1969                                                   | 2               |
| 16.   | M. Ya. Amusia,<br>N. A. Cherepkov,<br>S. I. Sheftel                        | Inelastic Electron Scattering on the Noble-Gas Atoms                                                   | Paper | J. Exp. Theor. Phys. (USSR Acad. Sci.), <b>58</b> , 2, p. 618-623, 1970                          | 6               |
| 17.   | M. Ya. Amusia,<br>L. V. Chernysheva<br>N. A. Cherepkov                     | Many-Electron Correlations in Photoabsorption on M-Shell of Ar                                         | Paper | Phys. Let. A, <b>31</b> , 10, p. 553, 1970                                                       |                 |
| 18.   | M. Ya. Amusia                                                              | Many-Electron Correlations in Atomic Electron Shells and Possible Ways of Their Experimental detection | Paper | in: <i>Atomic Physics II</i> , ed. P. Sandars, Plenum Press, London- New York, pp. 249-271, 1971 | 23              |

|     |                                                                          |                                                                                                                                                                                                                                                       |                 |                                                                                                                            |    |
|-----|--------------------------------------------------------------------------|-------------------------------------------------------------------------------------------------------------------------------------------------------------------------------------------------------------------------------------------------------|-----------------|----------------------------------------------------------------------------------------------------------------------------|----|
| 19. | M. Ya. Amusia,<br>N.A. Cherepkov,<br>L. V. Chernysheva                   | Noble-Gas<br>Photoionization Cross<br>Section with Many-<br>Electron Correlations                                                                                                                                                                     | Paper           | J. Exp. Theor. Phys.<br>(USSR Acad. Sci.),<br><b>60</b> , 1, p.160-174, 1971                                               | 15 |
| 20. | M. Ya. Amusia ,<br>N. A. Cherepkov,<br>L. V. Chernysheva                 | Many-Electron<br>Correlations and Their<br>Influence on the<br>Photoeffect                                                                                                                                                                            | Invited<br>talk | In: <i>Theory of Atomic<br/>and Molecular<br/>Electron Shells</i> ,<br>Mintis Publishing,<br>Villnius, p. 376-378,<br>1971 | 3  |
| 21. | L. V. Chernysheva,<br>N. A. Cherepkov                                    | Programs for calculating<br>atomic wave functions in<br>the Hartree-Fock<br>approximation.<br>(in Russian, Программы<br>вычисления атомных<br>волновых функций в<br>приближении Хартри-<br>Фока)                                                      | Preprint        | Ioffe Institute, №<br>337, Leningrad., 1971                                                                                | 60 |
| 22. | L. V. Chernysheva,<br>M. Ya. Amusia ,<br>N. A. Cherepkov                 | Programs for calculating<br>the photoionization cross<br>section of atoms taking<br>into account many-<br>electron correlation<br>(in Russian, Программы<br>вычисления сечения<br>фотоионизации атомов<br>с учетом<br>многоэлектронных<br>корреляций) | Preprint        | Ioffe Institute, №<br>375, Leningrad, 1971.                                                                                | 48 |
| 23. | M. Ya. Amusia,<br>M. P. Kazachkov,<br>N. A. Cherepkov                    | Many-Electron<br>Correlations in the<br>Processes of Inner Shell<br>Vacancies Decay                                                                                                                                                                   | Paper           | Phys. Let. A, <b>39</b> , 2, p.<br>93, 1972                                                                                |    |
| 24. | M. Ya. Amusia,<br>N. A. Cherepkov,<br>S. G. Shapiro                      | The Calculation of<br>Multipole Polarizabilities<br>and Van-der-Waals Force<br>Constants                                                                                                                                                              | Paper           | J. Exp. Theor. Phys.<br>(USSR Acad. Sci.),<br><b>63</b> , 3(9), p. 889, 1972                                               |    |
| 25. | M. Ya. Amusia,<br>N. A. Cherepkov,<br>L. V. Chernysheva                  | Angular Distribution of<br>Photoelectrons with<br>Many-Electron<br>Correlations                                                                                                                                                                       | Paper           | Phys. Let. A, <b>40</b> , 1, p.<br>15, 1972                                                                                |    |
| 26. | M. Ya. Amusia,<br>N. A. Cherepkov,<br>L. V. Chernysheva                  | Densities of Generalized<br>Oscillator Strengths for<br>Ar with the Inclusion of<br>Correlations                                                                                                                                                      | Paper           | Phys. Let. A, <b>40</b> , 1, p.<br>5, 1972                                                                                 |    |
| 27. | M. Ya. Amusia,<br>V. K. Ivanov,<br>N. A. Cherepkov,<br>L. V. Chernysheva | Interference Effects of<br>Noble-Gas Atoms Outer<br>s-Subshell                                                                                                                                                                                        | Paper           | Phys. Let. A, <b>40</b> , 5, p.<br>361, 1972                                                                               |    |

|     |                                                                                         |                                                                                                               |              |                                                                                                                                                                      |    |
|-----|-----------------------------------------------------------------------------------------|---------------------------------------------------------------------------------------------------------------|--------------|----------------------------------------------------------------------------------------------------------------------------------------------------------------------|----|
| 28. | M. Ya. Amusia,<br>N. A. Cherepkov,<br>S. I. Sheftel,<br>Zh. Zhivanovich,<br>R. Yanev    | The Role of Many-Electron Correlations in Fast Electron-Atom Inelastic Collisions                             | Paper        | J. of Phys. B: At. Mol. Phys., <b>6</b> , p. 1028, 1973                                                                                                              |    |
| 29. | M. Ya. Amusia,<br>V. K. Ivanov,<br>L. V. Chernysheva                                    | Photoproduction of Kr <sup>+</sup> and Xe <sup>+</sup> Ions in the Vicinity of the Outer d-Subshell Threshold | Paper        | Phys. Let. A, <b>43</b> , 3, p. 243, 1973                                                                                                                            |    |
| 30. | M. Ya. Amusia                                                                           | Correlation Effects in Collision Processes                                                                    | Invited talk | in: <i>The Physics of Electronic and Atomic Collisions</i> , VIII ICPEAC, invited lectures, ed. B. C. Chobić and M. N. Kurepa, Beograd, Yugoslavia, p. 172-204, 1973 |    |
| 31. | M. Ya. Amusia,<br>N. A. Cherepkov, L.V. Chernysheva,<br>S. G. Shapiro                   | Elastic Scattering of Slow Electrons and Level Shifts in Ar                                                   | Paper        | Phys. Let. A, <b>46</b> , 6, p. 387, 1974                                                                                                                            |    |
| 32. | M. Ya. Amusia,<br>P. U. Arifov,<br>A. S. Baltenkov,<br>A. A. Grinberg,<br>S. G. Shapiro | Calculation of Current Induced by Photon Momentum in Gaseous Ar                                               | Paper        | Phys. Let. A, <b>47</b> , 1, p. 66, 1974                                                                                                                             |    |
| 33. | M. Ya. Amusia,<br>V. K. Ivanov,<br>N. A. Cherepkov,<br>L. V. Chernysheva                | Intershell and Intersubshell Effects in Atomic Photoionization                                                | Paper        | J. Exp. Theor. Phys. (USSR Acad. Sci.), <b>66</b> , 5, p. 1537-1549, 1974                                                                                            | 13 |
| 34. | N. A. Cherepkov,<br>L. V. Chernysheva, V. Radojevic,<br>I. Pavlin                       | Many-electron correlations in the photoionization of a Nitrogen atom                                          | Paper        | Canad. J. Phys. <b>52</b> , p. 349, 1974                                                                                                                             |    |
| 35. | M. Ya. Amusia,<br>Zh. Zhivanovich,<br>N. A. Cherepkov,<br>R. Yanev                      | On the Problem of the Existence of Collective Oscillations in Atoms                                           | Paper        | J. of Phys. B: At. Mol. Phys., <b>7</b> , 57. p. 1435, 1974                                                                                                          |    |
| 36. | M. Ya. Amusia                                                                           | Effect of Many-Electron Correlations on Probability of Creation and Decay of Vacancies in Atoms               | Invited talk | Physica Fennica, Supplement S1, <b>9</b> , Otaniemi, Finland, p. 349-359, 1974                                                                                       | 11 |
| 37. | M. Ya. Amusia                                                                           | Manifestation of Collective Behavior of Electron Shells in the Process of Photoionization                     | Invited talk | in: <i>Vacuum Ultraviolet Radiation Physics</i> , ed. by E. Koch, R. Haensel, C. Kunz, Hamburg, p. 205-224, 1974                                                     | 20 |

|     |                                                                                           |                                                                                                                                                                                                                                              |          |                                                                                                                     |     |
|-----|-------------------------------------------------------------------------------------------|----------------------------------------------------------------------------------------------------------------------------------------------------------------------------------------------------------------------------------------------|----------|---------------------------------------------------------------------------------------------------------------------|-----|
| 38. | L. V. Chernysheva,<br>M. Ya. Amusia,<br>N. A. Cherepkov                                   | Programs for calculating the photoionization cross section of atoms taking into account correlations in one and two transitions (in Russian, Программы вычисления сечения фотоионизации атомов с учетом корреляций в одном и двух переходах) | Preprint | Ioffe Institute, № 459, Leningrad, 1974.                                                                            | 60  |
| 39. | L. V. Chernysheva,                                                                        | Software for calculating the interaction of photons and electrons with atoms (in Russian, Система математического обеспечения расчетов взаимодействия фотонов и электронов с атомами)                                                        | Paper    | In: Theory of atoms and atomic spectra, Riga: LGU after P. Stuchki, part 2, p. 104, 1974                            | 2   |
| 40. | M. Ya. Amusia,<br>A. S. Baltenkov,<br>A. A. Grinberg,<br>S. G. Shapiro                    | Investigation of the Current due to Photon Momentum in Monoatomic Gases                                                                                                                                                                      | Paper    | J. Exp. Theor. Phys. (USSR Acad. Sci.), <b>68</b> , p. 28-35, 1975 (Sov. Phys.- JETP, <b>41</b> , 14, 1975)         | 8   |
| 41. | M. Ya. Amusia,<br>N. A. Cherepkov,<br>A. Tanchich,<br>S. G. Shapiro,<br>L. V. Chernysheva | Slow Electron-Atom Elastic Scattering                                                                                                                                                                                                        | Paper    | J. Exp. Theor. Phys. (USSR Acad. Sci.), <b>68</b> , 6, p. 2023-2031, 1975                                           | 9   |
| 42. | M. Ya. Amusia,<br>N. B. Berezina,<br>L. V. Chernysheva                                    | Single Ionization of Xe by Fast Electrons in the Vicinity of the $4d^{10}$ Subshell Threshold                                                                                                                                                | Paper    | Phys. Let. A, <b>51</b> , 2, p. 101-102, 1975                                                                       | 2   |
| 43. | M. Ya. Amusia,<br>A. S. Baltenkov                                                         | Electron Entrainment in Deceleration by Light Absorption                                                                                                                                                                                     | Paper    | J. Exp. Theor. Phys. (USSR Acad. Sci.), <b>69</b> , 2(8), p. 547-554, 1975; Sov. Phys.- JETP, <b>42</b> , 279, 1975 | 8   |
| 44. | M. Ya. Amusia,<br>N. A. Cherepkov                                                         | Many-Electron Correlations in the Scattering Processes                                                                                                                                                                                       | Paper    | Case Studies in Atomic Physics, North-Holland Publishing Company, <b>5</b> , 2, p. 47-179, 1975                     | 133 |

|     |                                                         |                                                                                                                                                                                                                                                                                                                                |          |                                            |    |
|-----|---------------------------------------------------------|--------------------------------------------------------------------------------------------------------------------------------------------------------------------------------------------------------------------------------------------------------------------------------------------------------------------------------|----------|--------------------------------------------|----|
| 45. | L. V.Chernysheva,<br>N. A. Cherepkov,<br>V. Radojevic.  | System ATOM, 1.<br>Program for solving the<br>equations of the self-<br>consistent Hartree-Fock<br>field for atoms<br>(in Russian, Система<br>АТОМ, 1. Программа<br>решения уравнений<br>самосогласованного<br>поля Хартри-Фока для<br>атомов)                                                                                 | Preprint | Ioffe Institute, №<br>486, Leningrad, 1975 | 32 |
| 46. | L. V.Chernysheva,<br>N. A. Cherepkov,<br>V. Radojevic.  | ATOM system, II. The<br>program for calculating<br>the Hartree-Fock wave<br>functions of discrete and<br>continuous spectra in the<br>field of the "frozen" core<br>(in Russian, Программа<br>вычисления хартри-<br>фовских волновых<br>функций дискретного и<br>непрерывного спектров<br>в поле<br>«замороженного»<br>остова) | Preprint | Ioffe Institute, №<br>487, Leningrad, 1975 | 35 |
| 47. | L. V. Chernysheva,<br>M. Ya. Amusia ,<br>S. I. Sheftel' | ATOM system, III.<br>Program for calculating<br>generalized oscillator<br>strengths taking into<br>account correlations in<br>one transition<br>(in Russian, Система<br>АТОМ, III. Программа<br>вычисления<br>обобщенных сил<br>осцилляторов с учетом<br>корреляций в одном<br>переходе)                                       | Preprint | Ioffe Institute, №<br>493, Leningrad, 1975 | 56 |
| 48. | L. V. Chernysheva,<br>M. Ya. Amusia ,<br>S. I. Sheftel' | ATOM IV - Program for<br>calculating generalized<br>oscillator strengths taking<br>into account correlations<br>in two transitions<br>(in Russian, АТОМ IV -<br>Программа вычисления<br>обобщенных сил<br>осцилляторов с учетом<br>корреляций в двух<br>переходах)                                                             | Preprint | Ioffe Institute, №<br>495, Leningrad, 1975 | 53 |

|     |                                                                             |                                                                                                                             |                 |                                                                                                                             |    |
|-----|-----------------------------------------------------------------------------|-----------------------------------------------------------------------------------------------------------------------------|-----------------|-----------------------------------------------------------------------------------------------------------------------------|----|
| 49. | M. Ya. Amusia,<br>Zh. Zhivanovich,<br>V. Radojevich and N.<br>A. Cherepkov  | Photoabsorption for<br>Helium, Lithium and<br>Beryllium Atoms in the<br>RPAE                                                | Paper           | Phys. Rev. A, <b>13</b> , p.<br>1466-1474, 1976                                                                             | 9  |
| 50. | M. Ya. Amusia,<br>V. K. Ivanov and<br>S. A. Sheinerman                      | Intershell Correlations in<br>the Inelastic Scattering of<br>Fast Electrons on the<br>Outer Subshells in Ar and<br>Xe       | Paper           | J. of Phys. B: At.<br>Mol. Phys., <b>9</b> , 9, p.<br>1537-1553, 1976                                                       | 7  |
| 51. | M. Ya. Amusia and S. I.<br>Sheftel                                          | The Calculation of<br>Photoionization Cross<br>Section of $4d^{10}$ Subshell<br>of La Atom                                  | Paper           | Phys. Let. A, <b>55</b> , 8, p.<br>469-471, 1976                                                                            | 3  |
| 52. | M. Ya. Amusia,<br>V. K. Ivanov,<br>S. A. Sheinerman                         | The Generalized<br>Oscillation Strengths of<br>Discrete Excitations in Xe<br>$5s^2$ Subshell                                | Paper           | J. Tech. Phys. (USSR<br>Acad. Sci.), <b>46</b> , 10, p.<br>2207, 1976                                                       |    |
| 53. | M. Ya. Amusia,<br>V. K. Ivanov,<br>M. Yu. Kuchiev                           | Random-Phase Method in<br>Investigating the<br>Autoionizing States                                                          | Invited<br>talk | in: <i>Autoionization<br/>Atomic Phenomena</i> ,<br>Proc. Sci. Workshop,<br>p. 68-75 (June 2-4,<br>1975), Moscow, 1976      |    |
| 54. | M. Ya. Amusia,<br>A. S. Baltenkov, and A.<br>A. Paiziev                     | Electron-Atom<br>Bremsstrahlung with<br>Allowance for<br>Polarizability                                                     | Paper           | Letters to J. Exp.<br>Theor. Phys. (USSR<br>Acad. Sci.), <b>24</b> , 6, p.<br>366-369, 1976                                 | 4  |
| 55. | M. Ya. Amusia                                                               | The Effect of Outer<br>Atomic Shell<br>Rearrangement on the<br>Generalized Oscillator<br>Strength of the Inner<br>Shells    | Paper           | in: <i>Physics of Ionized<br/>Gases</i> (ed. B.<br>Navincheck),<br>University of<br>Ljubljana,<br>Yugoslavia, 1-14,<br>1976 | 14 |
| 56. | Zh. Zhivanovich,<br>V. Radojevich,<br>M. Ya. Amusia, and N.<br>A. Cherepkov | Generalized Oscillator<br>Strength and its First<br>Derivative for Helium<br>Atom in the Optical Limit                      | Paper           | J. of Phys. B: At.<br>Mol. Phys., <b>9</b> , 16, p.<br>L469-472, 1976                                                       | 4  |
| 57. | M. Ya. Amusia,<br>N. A. Cherepkov,<br>L. V. Chernysheva, S.<br>G. Shapiro   | The Elastic Scattering of<br>Slow Positrons on He<br>Atom                                                                   | Paper           | J. of Phys. B: At.<br>Mol. Phys., <b>9</b> , 17, p.<br>L531-534, 1976                                                       | 4  |
| 58. | M. Ya. Amusia,<br>V. K. Ivanov,<br>L. V. Chernysheva                        | Photoionization Cross<br>Section of $4d^{10}$ Xe, Cs and<br>Ba Subshells with<br>Account of Electron Shell<br>Rearrangement | Paper           | Phys. Let. A, <b>59</b> , p.<br>191-193, 1976                                                                               | 3  |
| 59. | L. V. Chernysheva,<br>N. A. Cherepkov,<br>V. Radojevic                      | Self-consistent field<br>Hartree-Fock program for<br>atoms                                                                  | Paper           | Comp. Phys. Commu<br>n. <b>11</b> , p. 57-73, 1976                                                                          | 17 |

|     |                                                                       |                                                                                                                                                                                                                                                                                                                              |        |                                                                                                             |    |
|-----|-----------------------------------------------------------------------|------------------------------------------------------------------------------------------------------------------------------------------------------------------------------------------------------------------------------------------------------------------------------------------------------------------------------|--------|-------------------------------------------------------------------------------------------------------------|----|
| 60. | L. V. Chernysheva,<br>M. Ya. Amusia,<br>S.G. Shapiro                  | System ATOM, V.<br>Program for calculating<br>the diagonal matrix<br>element of the self energy<br>part of the one-particle<br>Green's function<br>(in Russian: Система<br>АТОМ, V. Программа<br>вычисления<br>диагонального<br>матричного элемента<br>собственно<br>энергетической части<br>одночастичной<br>функции Грина) | Paper  | Ioffe Institute №<br>504, Leningrad,<br>1976.                                                               | 38 |
| 61. | M. Ya. Amusia and V.<br>K. Ivanov                                     | The Peculiarities of<br>Photoelectron Angular<br>Distribution and<br>Ionization Cross Section<br>of 5p Subshell in Xe                                                                                                                                                                                                        | Paper  | Phys. Let. A, <b>59</b> , 3, p.<br>194-196, 1976                                                            | 3  |
| 62. | M. Ya. Amusia,<br>I. S. Lee,<br>. N. Zinoviev                         | Single Photon Decay of<br>Double Hole States in<br>Atoms                                                                                                                                                                                                                                                                     | Paper  | Phys. Let. A, <b>60</b> , 4, p.<br>300-302, 1977                                                            | 3  |
| 63. | N. A. Cherepkov,<br>L. V. Chernysheva                                 | Random phase<br>approximation with<br>exchange for open-shell<br>atom                                                                                                                                                                                                                                                        | Paper  | Physics Letters A,<br>60, 2, p. 103, 1977                                                                   |    |
| 64. | M. Ya. Amusia,<br>I. S. Lee,<br>E. I. Cheglovkov,<br>L.V. Chernysheva | Raman effect of light on<br>argon atoms                                                                                                                                                                                                                                                                                      | Paper  | Izv. of Higher<br>Education Institutes,<br>Physics (USSR<br>Higher Education),<br><b>1</b> , p. 36-42, 1977 | 7  |
| 65. | L.V. Chernysheva                                                      | Software package for<br>atomic calculations<br>(in Russian: Пакет<br>прикладных программ<br>для проведения<br>атомных расчетов)                                                                                                                                                                                              | Paper  | Izvestia of the USSR<br>Academy of<br>Sciences, ser.<br>Physical, 41, 12,<br>p.2665, 1977                   |    |
| 66. | N. A. Cherepkov,<br>L. V. Chernysheva                                 | The photoionization cross<br>section of the chlorine<br>atom in the random<br>phase approximation<br>with exchange<br>(in Russian: Сечение<br>фотоионизации атома<br>хлора в приближении<br>случайных фаз с<br>обменом)                                                                                                      | report | Izvestia of the USSR<br>Academy of<br>Sciences, ser.<br>Physical, 41, 12,<br>p.2518-2528, 1977              | 11 |



|     |                                                                                       |                                                                                                                                                                       |              |                                                                                             |    |
|-----|---------------------------------------------------------------------------------------|-----------------------------------------------------------------------------------------------------------------------------------------------------------------------|--------------|---------------------------------------------------------------------------------------------|----|
| 67. | N. A. Cherepkov,<br>L. V. Chernysheva                                                 | Oscillator Forces and Photoionization Cross Section in the HF and RPAE Approximations (in Russian: Силы осцилляторов и сечение фотоионизации в приближении ХФ и RPAE) | report       | In: "Spectroscopic constants of atoms", M.: Scientific Council on Spectroscopy, p 253, 1977 |    |
| 68. | M. Ya. Amusia,<br>Zh. Zhivanovich,<br>I. Pavlin,<br>V. Radojevich,<br>N. A. Cherepkov | Photoabsorption for Sodium and Magnesium Atoms in the Random-Phase Approximation with Exchange                                                                        | Paper        | J. of Phys. B: At. Mol., Phys., <b>10</b> , 8, p. 1413-1423, 1977                           | 11 |
| 69. | M. Ya. Amusia,<br>V. K. Ivanov                                                        | Peculiarities of Electron Angular Distribution in 5p <sup>6</sup> Shells of Xe, Cs and Ba. Modern Theory of Atoms and Atomic Spectra                                  | Report       | Abstracts of Papers to All-Union Conference, Leningrad, 1977, p. 26-28, 1977                | 3  |
| 70. | M. Ya. Amusia                                                                         | The Ionization of Inner Shells of Atoms with Account of Outer Shell Rearrangement                                                                                     | Invited talk | in: <i>Atomic Physics</i> <b>5</b> , Plenum Press, New York-London, p. 537-565, 1977        | 29 |
| 71. | M. Ya. Amusia,<br>S. A. Sheinerman,<br>S. I. Sheftel                                  | The Generalized Oscillation Strengths of Inner Atomic Shells with Allowance for Outer-Shell Rearrangement                                                             | Paper        | J. Tech. Phys. (USSR Acad. Sci.), <b>47</b> , 7, p. 1432- 1441, 1977                        | 10 |
| 72. | M. Ya. Amusia<br>I. S. Lee                                                            | Single-Photon Decay of Two-Hole Atomic States                                                                                                                         | Paper        | J. Exp. Theor. Phys. (USSR Acad. Sci.), <b>73</b> , 2(8), p. 430-437, 1977                  | 8  |
| 73. | M. Ya. Amusia,<br>N. A. Cherepkov,<br>V. Radojevich                                   | Photoionization Cross Section Calculations for 4d <sup>10</sup> Subshell of In in the RPAE                                                                            | Paper        | Phys. Let. A, <b>60</b> , 1, p. 24-26, 1977                                                 | 3  |
| 74. | M. Ya. Amusia,<br>M. Yu. Kuchiev,<br>S. A. Sheinerman,<br>S. I. Sheftel               | Intershell Correlations in the Formation of Single Charged Ions Near the Ar L-Shell Ionization Threshold                                                              | Paper        | J. of Phys. B: At. Mol. Phys., <b>10</b> , 14, p. L535-539, 1977                            | 5  |
| 75. | M. Ya. Amusia,<br>I. S. Lee,<br>S. I. Sheftel                                         | Photoionization of Excited States in Ar and Xe Atoms                                                                                                                  | Paper        | Izv. USSR Acad. Sci., Ser. Fiz., <b>41</b> , 12, p. 2529-2537, 1977                         | 9  |
| 76. | M. Ya. Amusia and V. K. Ivanov                                                        | Peculiarities of Photoelectron Angular Distribution                                                                                                                   | Paper        | Izv. USSR Acad. Sci., Ser. Fiz., <b>41</b> , 12, p. 2509-2517, 1977                         | 9  |

|     |                                                                        |                                                                                                                                                                                                                                                                                                                                   |                 |                                                                                                         |    |
|-----|------------------------------------------------------------------------|-----------------------------------------------------------------------------------------------------------------------------------------------------------------------------------------------------------------------------------------------------------------------------------------------------------------------------------|-----------------|---------------------------------------------------------------------------------------------------------|----|
| 77. | L. V. Chernysheva,<br>M. Ya. Amusia,<br>V. K. Ivanov,<br>S. G. Shapiro | ATOM system, VI. A<br>program for calculating<br>the width of atomic levels<br>relative to Auger decay<br>taking into account<br>many-electron<br>correlations<br>(In Russian: Система<br>АТОМ, VI. Программа<br>вычисления ширины<br>атомных уровней<br>относительно оже-<br>распада с учетом<br>многоэлектронных<br>корреляций) | Preprint        | Ioffe Institute, №<br>536, Leningrad, 1977                                                              | 52 |
| 78. | M. Ya. Amusia and V.<br>K. Ivanov                                      | On the Existence of a<br>Collective Level in Xe<br>Atom                                                                                                                                                                                                                                                                           | Paper           | Phys. Let. A, <b>65</b> , 3, p.<br>217-219, 1978                                                        | 3  |
| 79. | M. Ya. Amusia                                                          | Modern Status of the<br>Atomic Photoeffect<br>Theory                                                                                                                                                                                                                                                                              | Invited<br>talk | Physics of Electronic<br>and Atomic<br>Collisions, Moscow<br>University<br>Publishing, p. 3-26,<br>1978 | 24 |
| 80. | M. Ya. Amusia,<br>V. K. Ivanov,<br>V. K. Dolmatov                      | Giant Autoionization in<br>Mn Atom                                                                                                                                                                                                                                                                                                | Paper           | Letters to J. Tech.<br>Phys. (USSR Acad.<br>Sci.), <b>4</b> , 21, p. 1305-<br>1309, 1978                | 5  |
| 81. | E. G. Berezhko,<br>V. K. Ivanov,<br>N. M. Kabachnik                    | The effect of many-<br>electron correlations on<br>the alignment of ions in<br>atomic photoionization                                                                                                                                                                                                                             | Paper           | Physics Letters A<br>1978, V. 66A, n.6, P.<br>474-475                                                   | 2  |

|     |                                                                          |                                                                                                                                                                                                                                                                                                                                                                                                                                                  |          |                                                                             |    |
|-----|--------------------------------------------------------------------------|--------------------------------------------------------------------------------------------------------------------------------------------------------------------------------------------------------------------------------------------------------------------------------------------------------------------------------------------------------------------------------------------------------------------------------------------------|----------|-----------------------------------------------------------------------------|----|
| 82. | L. V. Chernysheva,<br>M. Ya. Amusia,<br>V. Radoevich,<br>N. A. Cherepkov | ATOM VII system. -. The program for calculating the photoionization cross section of the atomic and optical forces of oscillators in the Hartree-Fock approximation and taking into account many-electron correlations in one transition.<br>(In Russian: Система АТОМ VII. -. Программа вычисления сечения фотоионизации атома и оптических сил осцилляторов в приближении Хартри-Фока и с учетом многоэлектронных корреляций в одном переходе) | Preprint | Ioffe Institute № 589, Leningrad, 1978                                      | 50 |
| 83. | V. K. Ivanov,<br>S. Yu. Medvedev,<br>V. A. Sosnivker                     | Multiparticle photoionization of the $4f^{14}$ , $5s^2$ , $5p^6$ , $5d^{10}$ and $6s^2$ shells of the mercury atom<br>(In Russian: Многочастичный характер фотоионизации $4f^{14}$ , $5s^2$ , $5p^6$ , $5d^{10}$ и $6s^2$ оболочек атома ртути)                                                                                                                                                                                                  | Preprint | Ioffe Institute № 615, Leningrad, 1979                                      | 28 |
| 84. | M. Ya. Amusia                                                            | Single-Photon and Single-Electron Decay of Double Vacancy States in Atoms                                                                                                                                                                                                                                                                                                                                                                        | Paper    | Comments on Atomic and Molecular Physics, <b>9</b> , 1, p. 23-34, 1979      | 12 |
| 85. | M. Ya. Amusia                                                            | The Manifestation of Intershell Interaction in the Process of Atomic Photoionization                                                                                                                                                                                                                                                                                                                                                             | Paper    | Comments on Atomic and Molecular Physics, <b>VIII</b> , 3-4, p. 61-71, 1979 | 11 |
| 86. | M. Ya. Amusia and S. A. Sheinerman                                       | Single-Electron Ionization of Ar $3s^2$ Subshell by Slow Electrons                                                                                                                                                                                                                                                                                                                                                                               | Paper    | J. of Phys. B: At. Mol. Phys., <b>12</b> , 4, p. 649-662, 1979              | 14 |
| 87. | M. Ya. Amusia,<br>M. Yu. Kuchiev and S. A. Sheinerman                    | Near-Threshold Effects in the Atomic Ionization Processes (Post-Collision Interaction)                                                                                                                                                                                                                                                                                                                                                           | Paper    | J. Exp. Theor. Phys. (USSR Acad. Sci.), <b>76</b> , 2, p. 470-481, 1979     | 12 |

|     |                                                                                                |                                                                                                                |                 |                                                                                                                                                                                 |    |
|-----|------------------------------------------------------------------------------------------------|----------------------------------------------------------------------------------------------------------------|-----------------|---------------------------------------------------------------------------------------------------------------------------------------------------------------------------------|----|
| 88. | M. Ya. Amusia,<br>V. V. Afrosimov,<br>S. V. Bobashev,<br>L. A. Shmaenok,<br>S. A. Sheinerman   | Two-Step He<br>Photoionization via the<br>excited 4p <sup>1</sup> P State                                      | Paper           | J. Exp. Theor. Phys.<br>(USSR Acad. Sci.),<br><b>76</b> , 3, p. 873-886,<br>1979                                                                                                | 14 |
| 89. | L. V. Chernysheva,<br>N. A. Cherepkov,<br>V. Radojevic                                         | Frozen-core Hartree-Fock<br>program for atomic<br>discrete and continuum<br>states                             | Paper           | Comp.Phys.Commu<br>n. 18,p.87, 1979                                                                                                                                             |    |
| 90. | M. Ya. Amusia,<br>I. S. Lee,<br>L. V. Chernysheva                                              | Combination Scattering<br>of Light on Complex<br>Atoms                                                         | Paper           | J. Tech. Phys. (USSR<br>Acad. Sci.), <b>49</b> , 4, p.<br>710-719, 1979                                                                                                         | 10 |
| 91. | M. Ya. Amusia,<br>Zh. Zhivanovich,<br>V. Radojevic,<br>N. A. Cherepkov                         | Generalized Oscillator<br>Strength for Beryllium<br>Atom in the Random<br>Phase Approximation<br>with Exchange | Paper           | Journal of Chemical<br>Physics, <b>71</b> , 4 p.<br>1761-1766, 1979                                                                                                             | 6  |
| 92. | M. Ya. Amusia                                                                                  | Photoionization Cross<br>Section and Oscillator<br>Strengths Calculation                                       | Invited<br>talk | In: <i>Progress in<br/>Spectroscopy</i> , 18<br>Spectroscopy<br>Congress, Gor'ky,<br>part 1, p. 73-86, 1979                                                                     | 14 |
| 93. | M. Ya. Amusia,<br>M. Yu. Kuchiev,<br>S. A. Sheinerman                                          | The Post-Collision<br>Interaction as a<br>Manifestation of Many-<br>Electron Correlations                      | Invited<br>talk | in: <i>Coherence and<br/>Correlations in<br/>Atomic Collisions</i> ,<br>eds. H. Kleinpoppen<br>and J. F. Williams,<br>Plenum Press, New<br>York and London, p.<br>297-313, 1980 | 17 |
| 94. | M. Ya. Amusia,<br>V. K. Ivanov,<br>S. A. Sheinerman,<br>S. I. Sheftel                          | Manifestation of Atomic<br>Electron Shell<br>Rearrangement in the<br>Ionization Processes                      | Paper           | J. Exp. Theor. Phys.<br>(USSR Acad. Sci.),<br><b>78</b> , 3, p. 910-923,<br>1980                                                                                                | 14 |
| 95. | V. G. Yarzhemsky<br>V. I. Nefedov,<br>M. Ya. Amusia,<br>N. A. Cherepkov,<br>L. V. Chernysheva  | Relative Intensities in X-<br>Ray Photoelectron<br>Spectra. VI. The Spectra<br>of HeI, HeII                    | Paper           | Journal of Electron<br>Spectroscopy and<br>Related Phenomena,<br><b>19</b> , 1-2, p. 123-<br>154,1980                                                                           | 32 |
| 96. | V. I. Nefedov,<br>M. Ya. Amusia,<br>N. A. Cherepkov,<br>L. V. Chernysheva, V.<br>G. Yarzhemsky | Relative Intensities in<br>Photoelectron Spectra<br>He(I) and He(II) of<br>Molecules                           | Paper           | J. Struct. Chem.<br>(USSR), <b>22</b> , 5, p. 180-<br>182, 1980                                                                                                                 | 3  |
| 97. | N. A. Cherepkov,<br>L. V. Chernysheva                                                          | Capture of mu-mesons by<br>He atoms<br>(In Russian: Захват мю-<br>мезонов атомами He)                          | Paper           | Soviet Journal of<br>Nuclear Physics-<br>USSR, V. 32, 3, P.<br>366-371                                                                                                          | 11 |

|      |                                                                           |                                                                                                                                                                                                                                                                                  |                  |                                                                                                                                                                                        |    |
|------|---------------------------------------------------------------------------|----------------------------------------------------------------------------------------------------------------------------------------------------------------------------------------------------------------------------------------------------------------------------------|------------------|----------------------------------------------------------------------------------------------------------------------------------------------------------------------------------------|----|
| 98.  | M. Ya. Amusia,<br>V. K. Dolmatov                                          | Electron Entrainment by<br>Resonance Frequency<br>Light                                                                                                                                                                                                                          | Paper            | J. Exp. Theor. Phys.<br>(USSR Acad. Sci.),<br><b>79</b> , 5(11), p. 1664-<br>1670, 1980                                                                                                | 7  |
| 99.  | M. Ya. Amusia                                                             | Rearrangement Effects in<br>Photoionization                                                                                                                                                                                                                                      | Paper            | Applied Optics, <b>19</b> ,<br>23, p. 4042-4050, 1980                                                                                                                                  | 9  |
| 100. | M. Ya. Amusia,<br>V. K. Ivanov,<br>V. K. Dolmatov                         | Electron Entrainment by<br>Resonance-Frequency<br>Light                                                                                                                                                                                                                          | Paper            | Letters to J. Tech.<br>Phys., <b>6</b> , 23, p. 1465-<br>1467, 1980                                                                                                                    | 3  |
| 101. | V. K. Ivanov,<br>L. V. Chernysheva                                        | Automation and<br>standardization of atomic<br>calculations<br>(In Russian:<br>Автоматизация и<br>стандартизация<br>атомных расчетов)                                                                                                                                            | Paper-<br>report | Proceedings of the X<br>All-Union Meeting<br>on the Physics of<br>Interaction of<br>Charged Particles<br>with Crystals. Part 2.<br>Ed. Moscow State<br>University, p.575-<br>580, 1980 | 6  |
| 102. | L. V. Chernysheva, M.<br>Ya. Amusia,<br>D. Davidovich,<br>N. A. Cherepkov | ATOM VIII System - a<br>program to calculate the<br>phase shifts in a<br>simplified random phase<br>approximation with<br>exchange<br>(In Russian: Система<br>АТОМ VIII – Программа<br>вычисления фаз<br>рассеяния в<br>упрощенном<br>приближении<br>случайных фаз с<br>обменом) | Preprint         | Ioffe Institute, №<br>663, Leningrad, 1980                                                                                                                                             | 48 |
| 103. | M. Ya. Amusia,<br>L. V. Chernysheva, S.<br>A. Sheinerman                  | The Influence of Inner<br>Shells upon the Angular<br>Distribution of Kr 4p-<br>Photoelectrons                                                                                                                                                                                    | Paper            | Phys. Let. A, <b>82</b> , 4, p.<br>171-173, 1981                                                                                                                                       | 3  |
| 104. | M. Ya. Amusia                                                             | Collective Effects in<br>Photoionization of Atoms                                                                                                                                                                                                                                | Review           | in: <i>Advances in<br/>Atomic and Molecular<br/>Physics</i> , ed. Bates,<br>Academic Press, <b>17</b> ,<br>p. 1-54, 1981                                                               | 54 |
| 105. | M. Ya. Amusia,<br>V. K. Ivanov,<br>L. V. Chernysheva                      | Peculiarities of the<br>Photoionization Cross<br>Section of the Mn Atom                                                                                                                                                                                                          | Paper            | J. of Phys. B: At. Mol.<br>Phys., <b>14</b> , p. L19-23,<br>1981                                                                                                                       | 5  |

|      |                                                                                               |                                                                                                                                               |              |                                                                                                                                               |    |
|------|-----------------------------------------------------------------------------------------------|-----------------------------------------------------------------------------------------------------------------------------------------------|--------------|-----------------------------------------------------------------------------------------------------------------------------------------------|----|
| 106. | M. Ya. Amusia,<br>A. S. Kheifets                                                              | The Influence of "Two-Electron-Two Hole" Excitations on the $3s^{-1}4p$ Autoionization Profile in Ar Atom                                     | Paper        | Phys. Let. A, <b>82</b> , 8, p. 407-411, 1981                                                                                                 | 5  |
| 107. | M. Ya. Amusia                                                                                 | A New Type of Atomic Electron Collectivization: "Melting" of Shells                                                                           | Paper        | Comments on Atomic and Molecular Physics, <b>10</b> , 5, p. 179-190, 1981                                                                     | 12 |
| 108. | M. Ya. Amusia,<br>V. K. Dolmatov,<br>K. Ivanov,<br>S. I. Sheftel                              | Giant Autoionization of the Atoms with Semi-Occupied Shells                                                                                   | Short review | in: <i>Autoionization Phenomena in Atoms</i> , Proc. II Scientific Workshop, Moscow State University Publishing (MSU Publ.), p. 235-242, 1981 | 8  |
| 109. | M. Ya. Amusia<br>V. K. Dolmatov                                                               | Autoionization Resonance Manifestation in the Processes of Electron Entrainment by Photons                                                    | Invited talk | Proc. II Scientific Workshop, MSU Publ., p. 118-124, 1981                                                                                     | 7  |
| 110. | M.Ya. Amusia,<br>A. S. Kheifets                                                               | Influence of "Two Electrons - Two Holes" Excitations on the Autoionization $3s^{-1} - np$ Profile Shape in Ar                                 | Invited talk | Proc. II Scientific Workshop, MSU Publ., p. 110-117, 1981                                                                                     | 8  |
| 111. | M. Ya. Amusia,<br>S. V. Bobashev,<br>S. A. Sheinerman                                         | Influence of $2p^4 (^1D) 4p^2 (^1S^1D)$ Autoionization State in Ne on the Ne II 40.71 nm Line Intensity Emitted in the $Na^+ + Ne$ Collisions | Invited talk | Ibid., p. 302-309, 1981                                                                                                                       | 8  |
| 112. | V. I. Nefedov,<br>V. G. Yarzhemsky, M.<br>Ya. Amusia,<br>N. A. Cherepkov<br>L. V. Chernysheva | Relative Intensities in X-Ray Photoelectron Spectra, VIII                                                                                     | Paper        | Journal of Electron Spectroscopy and Related Phenomena, <b>23</b> , No. 2-3, p.175-186, 1981                                                  | 12 |
| 113. | M. Ya. Amusia,<br>L. V. Chernysheva<br>S. I. Sheftel                                          | Nature of the Giant Resonance in Photoionization Cross Section of Eu Atom                                                                     | Paper        | J. Tech. Phys., Short Communications (USSR Acad. Sci.), <b>51</b> , 11, p. 2411, 1981                                                         |    |
| 114. | M. Ya. Amusia,<br>V. K. Ivanov<br>V. A. Kupchenko                                             | Photoionization of Inner Shells                                                                                                               | Paper        | J. of Phys. B: At. Mol. Phys., <b>14</b> , 21, p. L667-671, 1981                                                                              | 5  |
| 115. | M. Ya. Amusia                                                                                 | Collective Effects in an Isolated Atom                                                                                                        | Paper        | Izv. USSR Acad. Sci., Ser. Fiz., <b>45</b> , 12, p. 2242-2254, 1981                                                                           | 13 |

|      |                                                                                          |                                                                                                                                                                                                                                                                                                          |          |                                                                             |    |
|------|------------------------------------------------------------------------------------------|----------------------------------------------------------------------------------------------------------------------------------------------------------------------------------------------------------------------------------------------------------------------------------------------------------|----------|-----------------------------------------------------------------------------|----|
| 116. | L. V. Chernysheva,<br>N. A. Cherepkov<br>S. I. Sheftel                                   | ATOM IX system. The program for calculating the coefficients in the Hartree-Fock equations<br>Система АТОМ IX. (In: Программа вычисления коэффициентов в уравнениях Хартри-Фока)                                                                                                                         | Preprint | Ioffe Institute № 760, Leningrad, 1981                                      | 28 |
| 117. | L. V. Chernysheva                                                                        | Complex of programs for the automation of atomic calculations<br>(In Russian: Комплекс программ для автоматизации атомных расчетов)                                                                                                                                                                      | Preprint | Leningrad Research Center of the USSR Academy of Sciences,, 1981            | 80 |
| 118. | M. Ya. Amusia                                                                            | "Atomic" Bremsstrahlung Spectrum                                                                                                                                                                                                                                                                         | Paper    | Comments on Atomic and Molecular Physics, <b>11</b> , 3-5, p. 123-137, 1982 | 15 |
| 119. | M. Ya. Amusia,<br>L. V. Chernysheva, N. A. Cherepkov,<br>D. M. Davidovich, V. Radojevich | Slow Electron Elastic Scattering on Argon                                                                                                                                                                                                                                                                | Paper    | Phys. Rev. A, <b>25</b> , 1, p. 219-225, 1982                               | 7  |
| 120. | M. Ya. Amusia,<br>A. S. Kheifets                                                         | The Photoelectron Angular Distribution $\beta$ -Parameter in the Region of $3s^{-1}$ - $4p$ Resonance in Argon                                                                                                                                                                                           | Paper    | Phys. Let. A, <b>89</b> , 9, p. 437-440, 1982                               | 4  |
| 121. | L. V. Chernysheva, M. Ya. Amusia,<br>S. A. Sheinerman                                    | ATOM, X system Program for calculating the cross section for the excitation of triplet levels by electrons in the second order of the distorted wave method<br>(In Russian: Система АТОМ, X Программа вычисления сечения возбуждения триплетных уровней электронами во 2 порядке метода искаженных волн) | Preprint | Ioffe Institute № 776, Leningrad, 1982                                      | 32 |

|      |                                                                        |                                                                                                                                                                                                                             |              |                                                                                                                                 |    |
|------|------------------------------------------------------------------------|-----------------------------------------------------------------------------------------------------------------------------------------------------------------------------------------------------------------------------|--------------|---------------------------------------------------------------------------------------------------------------------------------|----|
| 122. | L. V. Chernysheva                                                      | Organization and capabilities of a complex of programs for carrying out atomic calculations<br>(In Russian: Организация и возможности комплекса программ для проведения атомных расчетов)                                   | Paper        | In: Information and computational problems of scientific research automation, Moscow: Nauka, p. 115-120, 1983                   | 6  |
| 123. | N. B. Avdonina<br>M. Ya. Amusia                                        | Excitation of 1P and 3P Levels of Mg Atom by Electron Impact                                                                                                                                                                | Paper        | J. Tech. Phys. (USSR Acad. Sci.), <b>53</b> , 2, p. 341-347, 1983                                                               | 7  |
| 124. | M. Ya. Amusia                                                          | Collective Effects in Isolated Atoms (Many Body Aspects of Photoionization Process)                                                                                                                                         | Invited talk | in: <i>Atomic Physics</i> <b>8</b> , ed. I. Lindgren, A. Rosen and S. Svanberg, Plenum Press, New York-London, p. 287-304, 1983 | 8  |
| 125. | N. B. Avdonina,<br>M. Ya. Amusia                                       | Characteristic Features in Photoionization of Excited Atomic States                                                                                                                                                         | Paper        | J. of Phys. B: At. Mol. Phys., <b>16</b> , 18, p. L543-545, 1983                                                                | 3  |
| 126. | M. Ya. Amusia,<br>V. K. Dolmatov,<br>V. K. Ivanov                      | Photoionization of Atoms with Half-Filled Shells                                                                                                                                                                            |              | J. Exp. Theor. Phys. (USSR Acad. Sci.), <b>85</b> , 1, p. 115-123, 1983                                                         | 9  |
| 127. | M. Ya. Amusia,<br>V. K. Dolmatov,<br>V. K. Ivanov                      | Energy Levels and Probabilities of the Transitions in Atoms with Half-Filled Shells                                                                                                                                         | Invited talk | in: <i>Energy Levels and Probabilities of Transitions in Atoms and Ions</i> , M., ed. U. I. Safronova, Moscow, p. 5-28, 1983    | 24 |
| 128. | M. Ya. Amusia,<br>V. K. Dolmatov,<br>V. K. Ivanov,<br>S. G. Shapiro    | Angular Distribution of 3p-Photoelectrons in Cr and Mn                                                                                                                                                                      | Paper        | J. of Phys. B: At. Mol. Phys., <b>16</b> , 24, p. L753-756, 1983                                                                | 4  |
| 129. | L. V. Chernysheva, M. Ya. Amusia,<br>N. B. Avdonina,<br>M. Yu. Kuchiev | System ATOM, XIII - Program for calculating the spectrum of "atomic" bremsstrahlung of fast electrons<br>(in Russian: Система АТОМ, XIII - Программа вычисления спектра «атомного» тормозного излучения быстрых электронов) | Preprint     | Ioffe Institute, № 865, Leningrad, 1983                                                                                         | 46 |
| 130. | M. Ya. Amusia,<br>V. Kilin,<br>I. S. Lee                               | Double Auger-Decay of two K-Vacancies in Ne                                                                                                                                                                                 | Paper        | J. Tech. Phys. (USSR Acad. Sci.), <b>54</b> , 5, p. 990-992, 1984                                                               | 3  |



|      |                                                                  |                                                                                  |              |                                                                                                                                                          |    |
|------|------------------------------------------------------------------|----------------------------------------------------------------------------------|--------------|----------------------------------------------------------------------------------------------------------------------------------------------------------|----|
| 131. | M. Ya. Amusia                                                    | Interaction of Complex Atoms with Radiation                                      | Paper        | Izv. USSR Acad. Sci., Ser. Fiz., <b>48</b> , 4, p. 642-650, 1984                                                                                         | 9  |
| 132. | M. Ya. Amusia, L. V. Chernysheva, S. A. Sheinerman               | Triplet $^3S$ Level Excitation by the Electrons of Low and Intermediate Energy   | Paper        | J. Tech. Phys. (USSR Acad. Sci.), <b>54</b> , 8, p. 1454-1464, 1984                                                                                      | 11 |
| 133. | M. Ya. Amusia, V. A. Kilin, A. N. Kolesnikova, I. S. Lee         | "Deepening" of Vacancies in Correlation Decays of Two-Hole Atomic States         | Paper        | Letters to J. Tech. Phys. (USSR Acad. Sci.), <b>10</b> , 17, p. 1029-1033; Sov. Tech. Phys. Lett., <b>10</b> , 9, p. 433-434, 1984                       | 2  |
| 134. | L. V. Chernysheva, M. Ya. Amusia, N. A. Cherepkov, V. Radoevich  | Program of Computing the Cross Section of Photoionization of Atoms               | Paper        | In: Automation systems in science and industry. Moscow: Science, p. 87-96, 1984                                                                          | 10 |
| 135. | M. Ya. Amusia                                                    | Many-Electron Effects in Photoionization of Intermediate and Inner Shells        | Invited talk | International Conference on X-Ray and Inner-Shell Processes in Atoms, Molecules and Solids, X84, ed. A. Meisel, J. Finster, Leipzig, GDR, p. 33-50, 1984 | 18 |
| 136. | M. Ya. Amusia, A. N. Kolesnikova, I. S. Lee                      | Hypersatellite Transitions in Neon                                               | Paper        | J. Tech. Phys., Short Communications (USSR Acad. Sci.), <b>55</b> , 1, p. 39-41, 1985                                                                    | 3  |
| 137. | M. Ya. Amusia, V. A. Kilin, I. S. Lee                            | Three-Electron Auger-Decay in Atoms                                              | Paper        | Optics and Spectroscopy (USSR Acad. Sci.), <b>59</b> , 2, p. 261-264, 1985                                                                               | 4  |
| 138. | M. Ya. Amusia, N. B. Avdonina, M. Yu. Kuchiev, L. V. Chernysheva | Stripping of the Atom in Bremsstrahlung                                          | Paper        | J. of Phys. B: At. Mol. Phys., <b>18</b> , p. L791-796, 1985                                                                                             | 6  |
| 139. | M. Yu. Kuchiev, S. A. Sheinerman                                 | 'The Post Collision Interaction in the inner-shell photoionization of Ar and Xe' | Paper        | J. of Phys. B: At. Mol. Opt. Phys., <b>18</b> , 16, pp. L551 - L556, 1985                                                                                | 6  |
| 140. | M. Ya. Amusia, V. A. Kilin, A. N. Kolesnikova, I. S. Lee         | Contrary Movement of Vacancies in Correlation Decays of Double Hole States       | Paper        | Letters to J. Tech. Phys. (USSR Acad. Sci.), <b>11</b> , 6, p. 343-346, 1985                                                                             | 4  |

|      |                                                                             |                                                                                                                                                                                                                                                                                |          |                                                                                               |    |
|------|-----------------------------------------------------------------------------|--------------------------------------------------------------------------------------------------------------------------------------------------------------------------------------------------------------------------------------------------------------------------------|----------|-----------------------------------------------------------------------------------------------|----|
| 141. | M. Ya. Amusia,<br>V. K. Ivanov,<br>V. A. Kupchenko                          | The Effect of Atomic Rearrangement on the Photoionization Cross Section for 3d Subshells of the Isoelectronic Xe Series                                                                                                                                                        | Paper    | J. of Phys. B: At. Mol. Opt. Phys., <b>18</b> , 19, p. 3871-3879, 1985                        | 9  |
| 142. | L. V. Chernysheva                                                           | Computational experiment in the study of the structure of atoms (in Russian<br>Вычислительный эксперимент при исследовании структуры атомов)                                                                                                                                   | Paper    | In: Problems of automation of scientific and production processes, M.: Nauka, p.126-131, 1985 | 6  |
| 143. | M. Ya. Amusia,<br>V. A. Sosnivker,<br>N. A. Cherepkov,<br>L. V. Chernysheva | Elastic Scattering of Slow Electrons on Ca Atom                                                                                                                                                                                                                                | Paper    | J. Tech. Phys. (USSR Acad. Sci.), <b>55</b> , 12, p. 2304-2311, 1985                          | 8  |
| 144. | M. Ya. Amusia,<br>V. K. Ivanov                                              | Photoionization of Complex Atoms                                                                                                                                                                                                                                               | review   | in: <i>Physics of Electron and Atomic Collisions</i> , Leningrad, p. 38-47, 1985              | 10 |
| 145. | A. S. Kheifets                                                              | Difference between the atomic ionization spectra in $(\gamma, e)$ and $(e, 2e)$ reactions                                                                                                                                                                                      | Paper    | Sov. Phys. -JETP, 62(2):260-265, 1985.                                                        |    |
| 146. | L. V. Chernysheva,<br>N. A. Cherepkov                                       | System ATOM, XIV – Program for calculating the meson wave functions in the “frozen” core field and the meson capture cross section (in Russian: Система АТОМ, XIV. Программы вычисления волновых функций мезона в поле “замороженного” остова и сечения захвата мезона атомом) | Preprint | Ioffe Institute, №. 943, Leningrad, 1985                                                      | 44 |
| 147. | L. V. Chernysheva,<br>M. Ya. Amusia,<br>V. A. Kilin<br>I. S. Li             | System ATOM, XV - Program for calculating the probability of double Auger decay (in Russian: Система АТОМ, XV - Программа вычисления вероятности двойного Оже-распада)                                                                                                         | Preprint | Ioffe Institute, №. 944, Leningrad, 1985                                                      | 25 |

|      |                                                                                              |                                                                                                                                                                                                            |                 |                                                                                                                                             |    |
|------|----------------------------------------------------------------------------------------------|------------------------------------------------------------------------------------------------------------------------------------------------------------------------------------------------------------|-----------------|---------------------------------------------------------------------------------------------------------------------------------------------|----|
| 148. | M. Ya. Amusia,<br>V. A. Sosnivker,<br>N. A. Cherepkov<br>L. V. Chernysheva<br>S. I. Scheftel | Elastic scattering of slow electrons by atoms and ions with one vacancy in a closed shell<br>(In Russian: Упругое рассеяние медленных электронов на атомах и ионах с одной вакансией в замкнутой оболочке) | Preprint        | Ioffe Institute, № 981. Leningrad, 1985                                                                                                     | 32 |
| 149. | N. B. Avdonina,<br>M. Ya. Amusia,<br>M. Yu. Kuchiev,<br>L. V. Chernysheva                    | Bremsstrahlung of Fast Electrons on Atoms                                                                                                                                                                  | Paper           | J. Exp. Theor. Phys. (USSR Acad. Sci.), <b>56</b> , 2, p. 246-254, 1986                                                                     | 9  |
| 150. | M. Ya. Amusia,<br>V. K. Dolmatov,<br>V. K. Ivanov                                            | Non-dipole Part of Angular Distribution of Photoelectrons and Entrainment Current in Atomic Vapor of Mn                                                                                                    | Paper           | J. Tech. Phys. (USSR Acad. Sci.), <b>56</b> , 1, p. 8-15; Sov. Phys. Tech. Phys. <b>31</b> , 1, p. 4-8, 1986                                | 8  |
| 151. | M. Ya. Amusia,<br>A. N. Kolesnikova,<br>I. S. Lee,                                           | Radiation of Dipole Quanta in "Forbidden" Transitions $n'l \rightarrow n'l \pm 3$                                                                                                                          | Paper           | J. Tech. Phys., Short Communications (USSR Acad. Sci.), <b>56</b> , 7, p. 1428-1430; Sov. Phys. Tech. Phys. <b>31</b> , 7, p. 847-848, 1986 | 3  |
| 152. | M. Ya. Amusia,<br>G. F. Gribakin,<br>V. K. Ivanov,<br>L. V. Chernysheva                      | Photodetachment from outer subshells of Negative Iodine Ion                                                                                                                                                | Paper           | Izv. USSR Acad. Sci., Ser. Phys., <b>50</b> , 7, p. 1274-1278, 1986                                                                         | 5  |
| 153. | M. Ya. Amusia,<br>A. N. Kolesnikova,<br>I. S. Lee                                            | Radiation of Low-Energy Photons in Combined Decay of Two Vacancies                                                                                                                                         | Paper           | Izv. USSR Acad. Sci., Ser. Phys., <b>50</b> , 7, p. 1279-1284, 1986                                                                         | 6  |
| 154. | N. B. Avdonina,<br>M. Ya. Amusia,<br>M. Yu. Kuchiev,<br>L. V. Chernysheva                    | Influence of the Atomic Structure on the Angular Distribution and Polarization of Bremsstrahlung                                                                                                           | Paper           | Izv. USSR Acad. Sci., Ser. Phys., <b>50</b> , 7, p. 1261-1266, 1986                                                                         | 6  |
| 155. | M. Ya. Amusia                                                                                | Electron Entrainment by Photons                                                                                                                                                                            | Обзорный доклад | In: <i>X-Ray and Electron Spectra and Chemical Bonding</i> , Vladivostok State University Publishing, Vladivostok, p. 88-97, 1986           | 10 |
| 156. | V.I.Fomichev,<br>V.K.Ivanov,<br>A.V.Kravtsov,<br>A.I.Mikhailov,<br>N.P.Popov                 | Muon transfer from mesic hydrogen to helium and lithium                                                                                                                                                    | Preprint        | Leningrad Nuclear Physics institute - LNPI. Preprint - 1177. Leningrad 1986. P. 14                                                          | 14 |

|      |                                                                                         |                                                                                                                                                                                                                                                                                                                  |          |                                                       |    |
|------|-----------------------------------------------------------------------------------------|------------------------------------------------------------------------------------------------------------------------------------------------------------------------------------------------------------------------------------------------------------------------------------------------------------------|----------|-------------------------------------------------------|----|
| 157. | V.K.Ivanov,<br>A.V.Kravtsov,<br>A.I.Mikhailov,<br>N.P.Popov,<br>V.I.Fomichev            | Recharge of mesohydrogen in helium and lithium at low energy (In Russian: Перезарядка мезоводорода в гелии и литии при низкой энергии)                                                                                                                                                                           | Paper    | JETP (in Russian: ЖЭТФ, Т.91, в.7. с.1274-1278, 1986) | 5  |
| 158. | L. V. Chernysheva<br>M. Yu. Kuchiev,<br>V. L. Yakhontov                                 | ATOM system, XVII. Program for calculating the wave functions of the ground state of atoms in the Hartree-Fock-Dirac approximation (In Russian: Система АТОМ, XVII. Программа вычисления волновых функций основного состояния атомов в приближении Хартри-Фока-Дирака)                                           | Preprint | Ioffe Institute, № 1015, Leningrad, 1986              | 38 |
| 159. | L. V. Chernysheva,<br>M. Ya., Amusia,<br>V. A. Kilin,<br>A. N. Kolesnikova,<br>I. S. Li | System ATOM, XVIII - The System ATOM, XVIII Program for calculating the probability of one-photon decay of two-hole states (In Russian: Система АТОМ, XVIII - The System ATOM, XVIII Программа вычисления вероятности однофотонного распада двухдырочных состояний)                                              | Preprint | Ioffe Institute, № 1054, Leningrad, 1986              | 29 |
| 160. | L. V. Chernysheva,<br>N. A. Cherepkov                                                   | ATOM XIX system. Program for calculating the photoionization cross section of an atom with an unfilled shell taking into account correlations in two transitions (in Russian: Система АТОМ XIX. Программа вычисления сечения фотоионизации атома с незаполненной оболочкой с учетом корреляций в двух переходах) | Preprint | Ioffe Institute, № 1079, Leningrad, 1986              | 49 |

|      |                                                                          |                                                                                                                                     |          |                                                                                                                      |    |
|------|--------------------------------------------------------------------------|-------------------------------------------------------------------------------------------------------------------------------------|----------|----------------------------------------------------------------------------------------------------------------------|----|
| 161. | M.Yu. Kuchiev,<br>S.A. Sheinerman                                        | Ar and Xe photoelectron-spectra with regard to after-collision interactions                                                         | Paper    | Izvestiya Akademii Nauk. Ser. Fizicheskaya, <b>50</b> , 7, pp. 1390 – 1394, 1986                                     | 5  |
| 162. | M.Yu. Kuchiev,<br>S.A. Sheinerman                                        | The calculation of the photoionization cross-section allowing for the Post Collision Interaction                                    | Paper    | Computer Physics Communications, <b>39</b> , 2, pp. 155 – 160, 1986                                                  | 6  |
| 163. | M.Yu. Kuchiev,<br>S.A. Sheinerman                                        | Resonant processes involving creation of 3 charged-particles                                                                        | Paper    | JETP, <b>90</b> , no. 5, pp. 1680 – 1689, 1986                                                                       | 10 |
| 164. | V. K. Ivanov,<br>A. V. Kravtsov,<br>A. I. Mikhailov,<br>N. P. Popov      | Muon transfer from mesic hydrogen to lithium and the atomic intershell correlations                                                 | Preprint | Leningrad Nuclear Physics institute - LNPI. Preprint - 1252. Leningrad 1987. P. 14                                   | 14 |
| 165. | G. F. Gribakin,<br>V. K. Ivanov,<br>M. Yu. Kuchiev,<br>L. V. Chernysheva | Calculation of negative ions by the methods of many-body theory (In Russian: Расчет отрицательных ионов методами теории многих тел) | Preprint | Ioffe Institute, № 1096, Leningrad, 1987                                                                             | 22 |
| 166. | M. Ya. Amusia<br>V. K. Dolmatov,                                         | A Characteristic Feature of Elastic Scattering of Electrons by Mn Atoms                                                             | Paper    | J. Tech. Phys., Short Communications (USSR Acad. Sci.), <b>57</b> , 5, p. 988-989, 1987                              | 2  |
| 167. | M. Ya. Amusia<br>V. K. Ivanov                                            | Intershell Interaction in Atoms                                                                                                     | Paper    | Uspekhi Fizicheskikh Nauk, (Soviet Physics - Uspekhi) <b>152</b> , 2, p.185-230, 1987                                | 46 |
| 168. | M. Ya. Amusia,<br>V. A. Kilin,<br>A. N. Kolesnikova,<br>I. S. Lee        | Low-Energy Correlation Satellites in Two-Vacancy Atoms                                                                              | Paper    | J. Tech. Phys. (USSR Acad. Sci.), <b>57</b> , 7, 1246-1254; Sov. Phys. Tech. Phys. <b>32</b> , 7, p.738-744, 1987    | 7  |
| 169. | M. Ya. Amusia,<br>A. N. Kolesnikova,<br>I. S. Lee                        | Cooperative Decays of Two-Vacancy States                                                                                            | Paper    | J. Tech. Phys. (USSR Acad. Sci.), <b>57</b> , 6, p. 1228- 1229, 1987                                                 | 2  |
| 170. | M. Ya. Amusia,<br>A. N. Kolesnikova,<br>I. S. Lee                        | Hypersatellite Decays of Vacancies                                                                                                  | Paper    | J. Tech. Phys. (USSR Acad. Sci.), <b>57</b> , 3, p. 1726-1734; Sov. Phys. Tech. Phys. <b>32</b> , 9, 1031-1036, 1987 | 6  |

|      |                                                                                          |                                                                                                                                                                                                                                                                              |          |                                                                                     |    |
|------|------------------------------------------------------------------------------------------|------------------------------------------------------------------------------------------------------------------------------------------------------------------------------------------------------------------------------------------------------------------------------|----------|-------------------------------------------------------------------------------------|----|
| 171. | M. E. Reich,<br>V. G. Yarzhevsky, V. I. Nefedov,<br>M. Ya. Amusia ,<br>L. V. Chernysheva | Calculation of Free-Path Lengths of Electrons in Carbon, Silicon, and Germanium                                                                                                                                                                                              | Paper    | Surface: Physics, Chemistry, Mechanics (USSR Acad. Sci.), <b>10</b> , 135-140, 1987 | 6  |
| 172. | L. V. Chernysheva<br>B. V. Gul'tzev,<br>M. M. Dovganich                                  | ATOM system, XX. Program for calculating atomic wave functions in the Hartree-Fock approximation on an ES computer<br>(In: Система АТОМ, XX. Программа вычисления атомных волновых функций в приближении Хартри-Фока на ЕС ЭВМ)                                              | Preprint | Materials on software, Ioffe Institute, Leningrad, 1987                             | 72 |
| 173. | L. V. Chernysheva, G. F. Gribakin                                                        | ATOM system, XXI. Program for calculating the wave functions of an electron in the field of a "frozen" core for states with the term 1S.<br>(In: Система АТОМ, XXI. Программа вычисления волновых функций электрона в поле "замороженного" остова для состояний с термом 1S) | Preprint | Materials on software, Ioffe Institute, Leningrad, 1987                             | 21 |
| 174. | G. F. Gribakin,<br>V. K. Ivanov,<br>M. Yu. Kuchiev,<br>L. V. Chernysheva                 | Calculation of negative ions by the methods of many-body theory<br>(In: Расчет отрицательных ионов методами теории многих тел)                                                                                                                                               | Preprint | Ioffe Institute, № 1096. Leningrad, 1987                                            | 22 |
| 175. | M.Yu. Kuchiev,<br>S. A. Sheinerman                                                       | After-collision interaction in the ionization of atomic inner shells by the electron shock                                                                                                                                                                                   | Paper    | Technical Physics, <b>57</b> , 8, pp. 1476 – 1487, 1987                             | 12 |
| 176. | V.A. Kilin,<br>I. S. Lee                                                                 | Double Auger effect in the multiparticle perturbation theory framework                                                                                                                                                                                                       | Paper    | Soviet Physics Journal Optics and Spectroscopy, DOI: 10.1007/BF00896135 , 1987      |    |

|      |                                                                                           |                                                                                                                                                                                                                                                                |       |                                                                                              |    |
|------|-------------------------------------------------------------------------------------------|----------------------------------------------------------------------------------------------------------------------------------------------------------------------------------------------------------------------------------------------------------------|-------|----------------------------------------------------------------------------------------------|----|
| 177. | M.Yu. Kuchiev,<br>S.A. Sheinerman                                                         | Resonance and<br>nonresonance processes<br>under low scattering rates<br>of forming charge<br>particles                                                                                                                                                        | Paper | Technical Physics<br>Letters, <b>13</b> , 16, pp.<br>1001 – 1006, 1987                       | 6  |
| 178. | M. Ya. Amusia,<br>A. N. Kolesnikova<br>I. S. Lee                                          | Radiative Semi-Auger<br>Satellites in the X-Ray<br>Spectra                                                                                                                                                                                                     | Paper | J. Tech. Phys. (USSR<br>Acad. Sci.), <b>58</b> , 3, p.<br>442-451, 1988                      | 10 |
| 179. | M. Ya. Amusia                                                                             | "Atomic" Bremsstrahlung                                                                                                                                                                                                                                        | Paper | Physics Reports, <b>162</b> ,<br>5, p. 249-335, 1988                                         | 7  |
| 180. | M. Ya. Amusia,<br>V. K. Dolmatov,<br>V. M. Romanenko                                      | Exchange Electron<br>Correlation Effects in<br>Outer Level<br>Photoionization of Half-<br>Filled Subshell Atoms<br>(Mn)                                                                                                                                        | Paper | J. of Phys. B: At.<br>Mol. Opt. Phys., <b>21</b> ,<br>7, p. L151-154, 1988                   | 4  |
| 181. | M. E. Reich,<br>V. G Yarzhemsky, V. I.<br>Nefedov,<br>M. Ya. Amusia,<br>L. V. Chernysheva | Free-Path Length of<br>Electrons in Aluminum,<br>Silicon, and Germanium<br>Oxides                                                                                                                                                                              | Paper | Surface: Physics,<br>Chemistry,<br>Mechanics, <b>4</b> , p. 49-<br>54, 1988                  | 6  |
| 182. | L. V. Chernysheva, G.<br>F. Gribakin,<br>V. K. Ivanov,<br>M. Yu. Kuchiev                  | Many-body calculations<br>of negative ions using the<br>Dyson equation                                                                                                                                                                                         | Paper | J.Phys.B, <b>21</b> , 15,<br>L419-425, 1988                                                  | 7  |
| 183. | V. F. Orlov,<br>N. A. Cherepkov,<br>L. V. Chernysheva,                                    | Calculation of the<br>photoionization cross<br>sections for chlorine and<br>oxygen atoms in the<br>region of autoionization<br>resonances<br>(In: Расчет сечений<br>фотоионизации атомов<br>хлора и кислорода в<br>области<br>автоионизационных<br>резонансов) | Paper | Opt. Spectrosc (In<br>Russian: Оптика и<br>спектроскопия, <b>64</b> ,<br>3, 683-685, 1988)   | 3  |
| 184. | V.K. Ivanov,<br>A.V. Kravtsov,<br>A.I. Mikhailov,<br>N.P. Popov                           | Muon transfer from mesic<br>hydrogen to lithium and<br>the atomic intershell<br>correlations                                                                                                                                                                   | Paper | Zeitschrift fur<br>Physik D-<br>Atoms, Molecules<br>and Clusters 1988. <b>7</b> ,<br>349-352 | 4  |
| 185. | L.V.Chernysheva,<br>G.F.Gribakin,<br>V.K.Ivanov,<br>M.Yu.Kuchiev                          | Many-body calculation of<br>negative ions using the<br>Dyson equation                                                                                                                                                                                          | Paper | J. of Phys. B:<br>At.Mol.Opt.Phys.,<br><b>21</b> , 15, pp. L419-<br>L425, 1988               | 7  |
| 186. | V. K. Dolmatov<br>T.T. Riskiev                                                            | Photoionization of the 4s<br>level in the chromium<br>atom in the 7-35 eV<br>region of photon energies                                                                                                                                                         | Paper | Opt.<br>Spectrosc.(USSR) <b>64</b><br>(5) 705-706, 1988                                      | 2  |

|      |                                                                          |                                                                                                              |       |                                                                                                                |    |
|------|--------------------------------------------------------------------------|--------------------------------------------------------------------------------------------------------------|-------|----------------------------------------------------------------------------------------------------------------|----|
| 187. | M.Yu. Kuchiev,<br>S.A. Sheinerman                                        | Resonant scattering with<br>low-velocity outgoing<br>charged particles                                       | Paper | J. of Phys. B:<br>At.Mol.Opt.Phys.,<br><b>21</b> , 11, pp. 2027 -<br>2038, 1988                                | 12 |
| 188. | G. F. Gribakin,<br>B. V. Gul'tsev,<br>V. K. Ivanov,<br>M. Yu. Kuchiev    | Negative alkaline earth<br>metal ions<br>(In Russian:<br>Отрицательные ионы<br>щелочноземельных<br>металлов) | Paper | Sov JTP Letters,<br>1989.<br><b>15</b> . 2. p.32-36                                                            | 5  |
| 189. | G. F. Gribakin,<br>B. V. Gul'tsev,<br>V. K. Ivanov,<br>M. Yu. Kuchiev    | Negative ions of alkaline-<br>earth metals                                                                   | Paper | ZhTF, Pis'ma 15,<br>No.12, 32–6 (1989)<br>(in Russian). Sov.<br>Tech. Phys. Lett. <b>15</b> ,<br>468-469, 1989 | 2  |
| 190. | M. Ya. Amusia,<br>L. V. Chernysheva, V.<br>K. Ivanov,<br>V. A. Kupchenko | Photoionization of<br>Lanthanum and Its Ions<br>in the Region of the Giant<br>Resonance                      | Paper | Zeitschrift für<br>Physik D: Atoms,<br>Molecules and<br>Clusters, <b>14</b> , 3, p.<br>215-217, 1989           | 3  |
| 191. | M. Ya. Amusia,<br>G. F. Gribakin,<br>K. L. Tsemekhman                    | Single and Double<br>Photoionization of Xe<br>Atom above the 4d-<br>Subshell Threshold                       | Paper | Izv. USSR Akad.<br>Nauk, Ser. Fiz., <b>53</b> , 9,<br>p. 1672- 1676, 1989                                      | 5  |
| 192. | M. Ya. Amusia,<br>V. K. Ivanov,<br>V. L. Kupchenko                       | The Photoionization of<br>Atomic Eu in the Vicinity<br>of Its Giant Resonance                                | Paper | Zeitschrift für<br>Physik D: Atoms,<br>Molecules and<br>Clusters, <b>14</b> , 3, p.<br>219-221, 1989           | 3  |
| 193. | M. Ya. Amusia<br>N. V. Avdonina                                          | Intershell Interaction in<br>Excited Atoms and Ions<br>Photoionization                                       | Paper | Zeitschrift für<br>Physik D: Atoms,<br>Molecules and<br>Clusters, <b>14</b> , 3, p.<br>191-194, 1989           | 4  |
| 194. | M. Ya. Amusia,<br>N. A. Cherepkov,<br>M. Nicolich,<br>A. Tanchich        | Momentum Transfer<br>Cross Section of Positrons<br>Elastically Scattered on<br>Helium                        | Paper | Phys. Let. A, <b>140</b> , 9,<br>p. 503-506, 1989                                                              | 4  |
| 195. | M. Ya. Amusia,<br>A. N. Kolesnikova, L. S.<br>Lee                        | Single Photon Decay of<br>Two Vacancies in Atoms<br>with Semi-Filled Shells                                  | Paper | Izv. of Higher<br>Education Institutes,<br>Physics (USSR<br>Higher Education),<br><b>2</b> , p. 100-102, 1989  | 3  |
| 196. | M. Ya. Amusia<br>V. A. Sosnivker                                         | 2P-Resonance in the<br>Elastic Scattering Cross<br>Section of Electrons upon<br>Calcium Atom                 | Paper | J. Tech. Phys. (USSR<br>Acad. Sci.), <b>59</b> , 3, p.<br>28-32, 1989                                          | 5  |



|      |                                                                                          |                                                                                                                                                                                                                                                                                                                                                                                     |          |                                                                            |    |
|------|------------------------------------------------------------------------------------------|-------------------------------------------------------------------------------------------------------------------------------------------------------------------------------------------------------------------------------------------------------------------------------------------------------------------------------------------------------------------------------------|----------|----------------------------------------------------------------------------|----|
| 197. | N. B. Avdonina and M. Ya. Amusia                                                         | Photoionization of Excited States of the Cesium Isoelectronic Sequence                                                                                                                                                                                                                                                                                                              | Paper    | Optics and Spectroscopy (USSR Acad. Sci.), <b>66</b> , 5, p. 990-995, 1989 | 6  |
| 198. | V. K. Dolmatov, T.T. Riskiev<br>V.M. Romanenko                                           | Characteristic properties of electron bremsstrahlung on a Mn atom                                                                                                                                                                                                                                                                                                                   | Paper    | Opt. Spectrosc. (USSR), <b>66</b> (2) 145-147, 1989                        | 3  |
| 199. | L. V. Chernysheva,<br>M. Ya. Amusia<br>N. B. Avdonina<br>A. V. Korol'                    | ATOM system, XXII. Program for calculating the bremsstrahlung spectrum of particles of intermediate energies (In: Система АТОМ, XXII. Программа вычисления спектра тормозного излучения частиц промежуточных энергий)                                                                                                                                                               | Preprint | Ioffe Institute, № 1314, Leningrad, 1989                                   | 38 |
| 200. | L. V. Chernysheva,<br>M. Ya. Amusia<br>V. G. Orlov,<br>S. K. Semenov,<br>N. A. Cherepkov | ATOM system. XXIII. The program for calculating the wave functions of an electron in the field of the "frozen core" with the possibility of different setting of off-diagonal energy parameters (In: Система АТОМ. XXIII. Программа вычисления волновых функций электрона в поле "замороженного остова" с возможностью различного задания недиагональных энергетических параметров) | Preprint | Ioffe Institute, № 1319, Leningrad, 1989                                   | 38 |
| 201. | M.Yu. Kuchiev,<br>S.A. Sheinerman                                                        | The Post Collision interaction in atomic processes                                                                                                                                                                                                                                                                                                                                  | Review   | Physics-Uspekhi, <b>158</b> , 3, pp. 353 – 387, 1989                       | 35 |
| 202. | M. Ya. Amusia,<br>G. F. Gribakin,<br>K. L. Tsemekhman, V. L. Tsemekhman                  | Single and Double Photoionization in Xe and Ba above the 4d-Threshold                                                                                                                                                                                                                                                                                                               | Paper    | J. of Phys. B: At. Mol. Opt. Phys., <b>23</b> , 3, p. 393-402, 1990        | 10 |
| 203. | M. Ya. Amusia<br>A. V. Korol'                                                            | Bremsstrahlung Spectrum for 600 eV Electrons on Xe                                                                                                                                                                                                                                                                                                                                  | Paper    | J. of Phys. B: At. Mol. Opt. Phys., <b>23</b> , p. 2899-2907, 1990         | 9  |
| 204. | N. B. Avdonina<br>M. Ya. Amusia                                                          | The Role of Intershell Correlations in Photoionization of Excited Ions and Atoms                                                                                                                                                                                                                                                                                                    | Paper    | J. Tech. Fiz. (USSR Acad. Sci.), <b>60</b> , 3, p. 66-72, 1990             | 7  |

|      |                                                                                               |                                                                                                                                              |                 |                                                                                                                                       |    |
|------|-----------------------------------------------------------------------------------------------|----------------------------------------------------------------------------------------------------------------------------------------------|-----------------|---------------------------------------------------------------------------------------------------------------------------------------|----|
| 205. | M. Ya. Amusia<br>V. K. Dolmatov                                                               | Elastic Scattering of<br>Electrons upon Atoms<br>with Semi-Filled Shells                                                                     | Paper           | J. Exp. Theor. Phys.<br>(USSR Acad. Sci.),<br><b>97</b> , 4, p. 1129-1139;<br>Sov. Phys. JETP, <b>70</b> ,<br>4, p. 632-638, 1990     | 7  |
| 206. | M. Ya. Amusia,<br>V. A. Sosnivker,<br>N. A. Cherepkov,<br>L. V. Chernysheva, S. I.<br>Sheftel | Elastic and Quasielastic<br>Scattering of Slow<br>Electrons upon Atoms<br>and Ions with a Single<br>Vacancy in a Closed Shell                | Paper           | J. Tech. Phys. (USSR<br>Acad. Sci.), <b>60</b> , 5, p.<br>1-9, 1990                                                                   | 9  |
| 207. | M. Ya. Amusia                                                                                 | Many-Electron Effects in<br>Absorption and Emission<br>of VUV Radiation by<br>Atoms and Ions                                                 | Paper           | Physica Scripta, <b>T31</b> ,<br>p. 43-56, 1990                                                                                       | 3  |
| 208. | M. Ya. Amusia                                                                                 | Polarization Radiation in<br>Electronic and Atomic<br>Collisions                                                                             | Invited<br>talk | ICPEAC-16, AIP<br>Conference<br>Proceedings, <b>206</b> , p.<br>201-214, 1990                                                         | 14 |
| 209. | M. Ya. Amusia,<br>G. F. Gribakin,<br>V. K. Ivanov<br>L. V. Chernysheva                        | Many-Electron<br>Correlations in the<br>Negative Ion<br>Photodetachment                                                                      | Paper           | J. of Phys. B: At.<br>Mol. Opt. Phys., <b>23</b> ,<br>3, p. 385-391, 1990                                                             | 7  |
| 210. | M. Ya. Amusia,<br>L. V. Chernysheva,<br>G. F. Gribakin,<br>K. L. Tsemekhman                   | Single and double<br>photoionization in Xe and<br>Ba above the 4d-threshold                                                                  | Paper           | J. Phys. B: At. Mol.<br>Opt. Phys., <b>23</b> , 3, p.<br>393-402, 1990                                                                | 10 |
| 211. | L. V. Chernysheva                                                                             | Study of atomic<br>structures based on an<br>automated system<br>(In: Изучение атомных<br>структур на базе<br>автоматизированной<br>системы) | Paper           | In: Problems of<br>information<br>processing and<br>integrated<br>automation of<br>production. L.:<br>Nauka, LIIA, 1990,<br>p.155-161 | 7  |
| 212. | V. K. Ivanov,<br>L. V. Chernysheva                                                            | Photoionization of atoms<br>with half-filled $np^3$ -<br>shells<br>(In: Фотоионизация<br>атомов с<br>полузаполненными<br>$np^3$ -оболочками) | Paper           | Optics and<br>spectroscopy, т. <b>69</b> ,<br>вып.2, с.289-294,<br>1990 (In Russian)                                                  | 6  |
| 213. | M. Ya. Amusia,<br>L. V. Chernysheva, A.<br>V. Korol'                                          | Bremsstrahlung spectrum<br>on Xe for 600 eV                                                                                                  | Paper           | J. Phys. B-At. Mol.<br>Opt. Phys. V. 23, 16,<br>P. 2899-2907, 1990                                                                    | 9  |
| 214. | M. Ya. Amusia,<br>E. P. Busygin,<br>V. G. Grigoriants<br>S. A. Sheinerman                     | On the Polarization of<br>Radiation of the Diffuse<br>Series of Cesium Atom                                                                  | Paper           | Optics and<br>Spectroscopy (USSR<br>Acad. Sci.), <b>69</b> , 2, p.<br>272-277, 1990                                                   | 6  |

|      |                                                                  |                                                                                                                                                                                                                                                                                                                                                                                  |          |                                                                                                                                                               |    |
|------|------------------------------------------------------------------|----------------------------------------------------------------------------------------------------------------------------------------------------------------------------------------------------------------------------------------------------------------------------------------------------------------------------------------------------------------------------------|----------|---------------------------------------------------------------------------------------------------------------------------------------------------------------|----|
| 215. | M. Ya. Amusia,<br>V. K. Dolmatov,<br>M. M. Mansurov              | A New Feature of 3p to 3d Transitions in Mn Atom                                                                                                                                                                                                                                                                                                                                 | Paper    | J. of Phys. B: At. Mol. Opt. Phys., <b>23</b> , p. L491-494, 1990                                                                                             | 4  |
| 216. | M. Ya. Amusia                                                    | Correlation in Atomic Inner Shell Processes                                                                                                                                                                                                                                                                                                                                      | Paper    | in: <i>X-Ray and Inner-Shell Processes</i> , X-90, ed. T. A. Carlson, M. O. Krause and S. T. Manson, AIP Conference Proceedings, <b>215</b> , p. 25- 45, 1990 | 21 |
| 217. | G. F.Gribakin,<br>B. V.Gultsev,<br>V. K.Ivanov,<br>M. Yu.Kuchiev | Interaction of an alkaline-earth atom with an electron: scattering, negative ion and photodetachment                                                                                                                                                                                                                                                                             | Paper    | Journal of Physics B: At.Mol.Opt.Phys.1990, V. 23, P. 4505-4519.                                                                                              | 15 |
| 218. | V. K. Dolmatov                                                   | Marked differences in the 4s photoionization between the Cr(4s, <sup>7</sup> S <sub>3</sub> ) and Cr*(4s, <sup>5</sup> S <sub>2</sub> ) atoms                                                                                                                                                                                                                                    | Paper    | J. Phys. B: At. Mol. Opt. Phys. 1990, <b>23</b> , L625-L628                                                                                                   | 4  |
| 219. | L. V. Chernysheva M.<br>Ya. Amusia,<br>K. L. Tzemekhman          | ATOM. XXIV. Program for calculating the cross sections for photoabsorption and single photoionization of intermediate atomic shells taking into account the self-energy part of the photoelectron (In: ATOM. XXIV. Программа вычисления сечений фотопоглощения и однократной фотоионизации промежуточных оболочек атомов с учетом собственно-энергетической части фотоэлектрона) | Preprint | Ioffe Institute, № 1492, Leningrad, 1990                                                                                                                      | 33 |
| 220. | M.Yu. Kuchiev,<br>S.A. Sheinerman                                | PCI in Giant Resonances                                                                                                                                                                                                                                                                                                                                                          | Paper    | J. Phys. B: At. Mol. Opt. Phys., <b>23</b> , 6, L79-L82, 1990                                                                                                 | 4  |
| 221. | M.Yu. Kuchiev,<br>S.A. Sheinerman.                               | PCI influence on the atomic Auger spectrum induced by fast electron impact                                                                                                                                                                                                                                                                                                       | Paper    | J. Phys. B: At. Mol. Opt. Phys., <b>23</b> , 12, 2131-2136, 1990                                                                                              | 6  |

|      |                                                    |                                                                                                                                                                                             |        |                                                                                                                                                                 |    |
|------|----------------------------------------------------|---------------------------------------------------------------------------------------------------------------------------------------------------------------------------------------------|--------|-----------------------------------------------------------------------------------------------------------------------------------------------------------------|----|
| 222. | G. F. Gribakin,<br>B. V. Gultsev,<br>V. K. Ivanov, | Photoabsorption by 2p electrons of oxygen in high temperature superconductor.<br>(In Russian: Фотопоглощение 2p-электронами кислорода в ВТСП)                                               | Paper  | Superconductivity: physics, chemistry, engineering<br>(In Russian: Сверхпроводимость: физика, химия, техника 1991, т.4, №10, С. 1873-1878.)                     | 6  |
| 223. | V. K. Ivanov                                       | Many-electron effects in negative ion photodetachment                                                                                                                                       | Report | Proceedings of the UK/USSR Seminar "Today and Tomorrow in Photoionisation" (Leningrad, 1990). Eds. M.Ya.Amusia, J.B.West. Daresbury Laboratory. 1991. P.143-148 | 6  |
| 224. | N. B. Avdonina                                     | Photoionization Cross Sections of Excited States of Atoms and Ions                                                                                                                          | Report | Proceedings of the UK/USSR Seminar "Today and Tomorrow in Photoionisation" (Leningrad, 1990). Eds. M.Ya.Amusia, J.B.West. Daresbury Laboratory. 1991. P.149-154 | 6  |
| 225. | G. F. Gribakin,<br>V. K. Ivanov,<br>M. Yu. Kuchiev | Elastic scattering of electrons by atoms of alkaline earth elements. Negative ions.<br>(In Russian: Упругое рассеяние электронов на атомах щелочноземельных элементов. Отрицательные ионы.) | Report | In: Physics of electronic and atomic collisions №12. SPb, 1991. p. 77-88. (In Russian)                                                                          | 12 |
| 226. | M. Ya. Amusia<br>I. S. Lee                         | Correlated Decay of Two Vacancies in Atoms                                                                                                                                                  | Paper  | J. of Phys. B: At. Mol. Opt. Phys., <b>24</b> , p. 2617-2632, 1991                                                                                              | 16 |

|      |                                                                                          |                                                                                                                                                                                                                                                                                                 |          |                                                                                           |    |
|------|------------------------------------------------------------------------------------------|-------------------------------------------------------------------------------------------------------------------------------------------------------------------------------------------------------------------------------------------------------------------------------------------------|----------|-------------------------------------------------------------------------------------------|----|
| 227. | V.G.Yarzhemsky,<br>T. Reich,<br>L. V. Chernysheva.                                       | Effect of dipole polarizability on the relative intensities of 2s and 2p lines in the X-ray electron spectra of Si, S, Ca<br>(In Russian: Влияние дипольной поляризуемости на относительные интенсивности 2s и 2p линий в рентгеноэлектронных спектрах Si, S, Ca)                               | paper    | Optics and Spectroscopy (in Russian: Оптика и спектроскопия. т.70, вып.1, с. 26-30, 1991) | 5  |
| 228. | V. K. Dolmatov                                                                           | Suggested experimental study of the $^3P$ "shape" resonance in the e-N elastic scattering                                                                                                                                                                                                       | Paper    | Sov. Phys. Techn. Phys. 36 (6) 704-705, 1991                                              | 2  |
| 229. | L. V. Chernysheva,<br>M. Ya. Amusia,<br>A. S. Kheifets                                   | ATOM system, XXVI. Program for calculating the differential cross sections for the excitation and ionization of an atom by electron impact<br>(In Russian: Система АТОМ, XXVI. Программа вычисления дифференциальных сечений возбуждения и ионизации атома электронным ударом)                  | Preprint | Ioffe Institute, № 1531, Leningrad, 1991                                                  | 38 |
| 230. | L. V. Chernysheva M.<br>Ya. Amusia,<br>V. G. Orlov,<br>S. K. Semenov,<br>N. A. Cherepkov | ATOM system, XXVII. The program for calculating the Hartree-Fock wave functions of an electron in the field of a "frozen" core on an ES computer<br>(In Russian: Система АТОМ, XXVII. Программа вычисления хартри-фоковских волновых функций электрона в поле "замороженного" остова на ЕС ЭВМ) | Preprint | Ioffe Institute, № 1574, Leningrad, 1991                                                  | 43 |
| 231. | M.Yu. Kuchiev,<br>S.A. Sheinerman                                                        | Evaluation of parameters of Hg $5d^96s^2(^2D_{3/2})6p_{1/2}/(3/2\ 1/2)_2$ autoionizing state from PCI spectra                                                                                                                                                                                   | Paper    | J. of Phys. B: At. Mol. Opt. Phys., 24, 22, p. 4775-4781, 1991                            |    |

|      |                                                                                                                            |                                                                                                                             |        |                                                                                     |    |
|------|----------------------------------------------------------------------------------------------------------------------------|-----------------------------------------------------------------------------------------------------------------------------|--------|-------------------------------------------------------------------------------------|----|
| 232. | V.A. Kilin<br>I. S. Li,<br>O.V. Li                                                                                         | Electron angular distribution in double Auger decay                                                                         | Paper  | Optics and Spectroscopy, 61 (2), pp. 40-45, 1991                                    | 6  |
| 233. | V. G. Yarzhemsky,<br>T. Reich,<br>L. V. Chernysheva                                                                        | The influence of Coster-Kronig decay processes on the relative intensities 2p, 2s -photoelectron lines of Si, P, Cl, and Ca | Paper  | J Elect.Spectr. & Related Phenomena, v.58, 1-2, pp.67-73, 1992                      | 7  |
| 234. | M. Ya. Amusia,<br>I. S. Lee,<br>V. A. Kilin                                                                                | The Decay of an Electron-Vacancy Excitation in the Presence of Another Vacancy                                              | Paper  | J. of Phys. B: At. Mol. Opt. Phys., <b>25</b> , 3, p. 657-666, 1992                 | 10 |
| 235. | M. Ya. Amusia,<br>V. A. Kilin,<br>I. S. Lee                                                                                | Double Auger Decay in Atoms: Probability and Angular Distribution                                                           | Paper  | Phys. Rev. A, <b>45</b> , 7, p. 4576-4587, 1992                                     | 12 |
| 236. | M. Ya. Amusia and A. V. Korol'                                                                                             | Angular Distribution and Polarization of Bremsstrahlung formed in Intermediate Energy Particle-Atom Scattering              | Paper  | J. of Phys. B: At. Mol. Opt. Phys., <b>25</b> , p. 2383-2392, 1992                  | 10 |
| 237. | M. Ya. Amusia and I. S. Lee                                                                                                | Radiative Semi-Auger Decay in Atoms                                                                                         | Paper  | Physica Scripta, <b>T-41</b> , p. 23-27, 1992                                       | 6  |
| 238. | D. Klar, H. Harth,<br>J. Ganz,<br>T. Kraft,<br>M.-W. Ruf,<br>H. Hotop,<br>M. Ya. Amusia,<br>V. Tsemekhman<br>K. Tsemekhman | On the J-Dependence of the Odd ( $ns'$ , $J = 0,1$ ) Autoionization Resonances of the Rare Gases Ne, Ar, Kr and Xe          | Paper  | Zeitschrift für Physik, D: Atoms, Molecules, Clusters, <b>23</b> , p. 101-113, 1992 | 3  |
| 239. | M. Ya. Amusia and A. S. Kheifets,                                                                                          | Relativistic <i>ab initio</i> calculations of the Xenon 5s Ionization Spectra for the ( $\gamma$ , e) and (e,2e) Reactions  | Paper  | Phys. Rev. A, <b>46</b> , 2, p. 1261-1269, 1992                                     | 9  |
| 240. | M. Ya. Amusia,<br>V. V. Tsemekhman,<br>K. V. Tsemekhman                                                                    | The widths of $nd'$ ( $J = 1,2$ ) Rydberg Autoionization resonances in the rare gas atoms. MBPT approach                    | report | Institute of Physics Conference Series, <b>128</b> , Sec. 2, p. 83-86, 1992         | 4  |
| 241. | G. F. Gribakin,<br>A. A. Gribakina,<br>B. V. Gultsev,<br>V. K. Ivanov,                                                     | Correlational autodetachment of the low-lying shape resonances in $C^-$ , $Si^-$ and $Ge^-$ photodetachment                 | Paper  | Journal of Physics B: At.Mol.Opt.Phys.1992, V. 25, P. 1757-1772.                    | 16 |
| 242. | G. F. Gribakin,<br>B. V. Gultsev,<br>V. K. Ivanov,<br>M. Yu. Kuchiev,<br>A. R. Tancic                                      | Momentum transfer cross sections for slow electron elastic scattering on Ca, Sr and Ba atoms                                | Paper  | Physics Letters A 1992, <b>164</b> , 1, pp.73-82.                                   | 10 |

|      |                                                                          |                                                                                                                                                                                |        |                                                                                                                                                                                           |    |
|------|--------------------------------------------------------------------------|--------------------------------------------------------------------------------------------------------------------------------------------------------------------------------|--------|-------------------------------------------------------------------------------------------------------------------------------------------------------------------------------------------|----|
| 243. | A. A. Gribakina,<br>G. F. Gribakin,<br>V. K. Ivanov                      | Structure and<br>photodetachment of the<br>Yb <sup>-</sup> negative ion                                                                                                        | Paper  | Physics Letters A<br>1992, <b>168</b> , 4, p. 280-<br>284.                                                                                                                                | 5  |
| 244. | V. K. Dolmatov                                                           | Striking differences<br>between the 4s<br>photoionization of free<br>Mn <sup>+</sup> and Mn <sup>+</sup> *                                                                     | Paper  | J. Phys. B: At. Mol.<br>Opt. Phys. <b>25</b> , L629-<br>L634, 1992                                                                                                                        | 6  |
| 245. | N.B.Avdonina<br>R. H. Pratt<br>L.V. Chernysheva                          | Photoionization of<br>Excited Highly Charged<br>Ions                                                                                                                           | Paper  | AIP Conference<br>Proceeding 274,<br>American Institute<br>of Physics, New-<br>York 553-555 (1992)                                                                                        | 3  |
| 246. | A. A. Gribakina,<br>G. F. Gribakin,<br>V. K. Ivanov,<br>V. A. Kharchenko | The probability of<br>phonon decay of excited<br>donor states as a function<br>of donor chemical shift                                                                         | Paper  | Semicond.Science<br>Technol., <b>8</b> , p. 20-24,<br>1993.                                                                                                                               | 5  |
| 247. | V. K. Ivanov,<br>J. B. West                                              | The photoionisation cross<br>sections of the 4s, 3p and<br>3s subshells of Ca <sup>+</sup>                                                                                     | Paper  | Journal of Physics B:<br>At.Mol.Opt.Phys. <b>26</b> ,<br>n.14, P. 2099-2113,<br>1993.                                                                                                     | 15 |
| 248. | P. Dunne,<br>G. O'Sullivan,<br>V. K. Ivanov                              | Extreme-ultraviolet<br>absorption spectrum of<br>Ga <sup>+</sup> .                                                                                                             | Paper  | Physical Review A<br><b>48</b> , n.6, P. 4358-4364,<br>1993.                                                                                                                              | 7  |
| 249. | V. K. Ivanov,<br>A. N. Ipatov,<br>V. A. Kharchenko,<br>M. L. Zhyzhin     | Electronic structure and<br>adiabatic vibrations of<br>metal clusters<br>(In Russian: Электронная<br>структура и<br>адиабатические<br>колебания<br>металлических<br>кластеров) | Paper  | JETP Lett<br>(in Russian: Письма<br>в ЖЭТФ <b>58</b> , в.8,<br>с.649-655, 1993.)                                                                                                          | 7  |
| 250. | V. K. Ivanov                                                             | Photoionisation of<br>positive and negative ions                                                                                                                               | Report | In: Proceedings of<br>the 10th VUV<br>Conference (Invited<br>lectures and<br>Progress reports,<br>Paris 1992).<br>Eds. F.J.Wuilleumier<br>et al. World<br>Scientific, 1993.<br>P.178-187. | 8  |

|      |                                                                                                          |                                                                                                     |        |                                                                                                                                                                   |    |
|------|----------------------------------------------------------------------------------------------------------|-----------------------------------------------------------------------------------------------------|--------|-------------------------------------------------------------------------------------------------------------------------------------------------------------------|----|
| 251. | V. K. Ivanov                                                                                             | Photodetachment cross sections and photoelectron angular distributions from negative ions           | Report | In: Proceedings of the International Workshop on Photoionization (Berlin, 1992). Eds. U. Becker and U. Heinzmann, p.81-84, 1993.                                  | 5  |
| 252. | I. S. Lee,<br>R. Wehlitz,<br>M. Ya. Amusia,<br>U. Becker                                                 | Evidence for a new class of many-electron Auger-transitions in atoms                                | Paper  | J. of Phys. B: At. Mol. Opt. Phys., <b>26</b> , p. 41-46, 1993                                                                                                    | 6  |
| 253. | U. Becker,<br>O. Hemmers,<br>B. Lager,<br>M. Ya. Amusia,<br>I. Lee,<br>A. Menzel,<br>R. Wehlitz          | Multiplet-changing Auger transitions in valence double photoionization                              | Paper  | Phys. Rev. A, <b>47</b> , 2, p. R 767-770, 1993                                                                                                                   | 4  |
| 254. | M. Ya. Amusia<br>V. K. Dolmatov                                                                          | Photoionization of inner <i>ns</i> electrons in semi-filled shell atoms (3s electrons in a Mn atom) | Paper  | J. of Phys. B: At. Mol. Opt. Phys., <b>26</b> , p.1425-1434, 1993                                                                                                 | 10 |
| 255. | V. A. Kilin,<br>M. Ya. Amusia,<br>L. V. Chernysheva, A. Ehresmann,<br>H. Schmoranzner<br>K.-H. Schartner | Three-electron radiative transition                                                                 | Paper  | J. of Phys. B: At. Mol. Opt. Phys., <b>26</b> , p. L97-102, 1993                                                                                                  | 6  |
| 256. | M. Ya. Amusia,<br>V. A. Kilin,<br>A. Ehresmann,<br>H. Schmoranzner<br>K.-H. Schartner                    | Double Electron Autoionization Decay of Resonantly Excited Single Electron States                   | Paper  | J. Phys. B: At. Mol. Opt. Phys., <b>26</b> , 1281-1300, 1993                                                                                                      | 20 |
| 257. | M. Ya. Amusia,<br>I. S. Lee                                                                              | Correlative Decay of Highly Excited Atomic States                                                   | Paper  | Atomic Physics 13, ed. H. Walters, T. W. Hansch and B. Neizerk, AIP Conference Proceedings <b>275</b> , American Institute of Physics, New York, p. 375-387, 1993 | 13 |
| 258. | V. K. Dolmatov                                                                                           | On the 3p photoabsorption cross section of free Mn <sup>+</sup>                                     | Paper  | J. Phys. B: At. Mol. Opt. Phys. <b>26</b> , L79-L84, 1993.                                                                                                        | 6  |



|      |                                                                                                                          |                                                                                                                                                                                                                                                                                                                                                  |          |                                                                                                                                  |    |
|------|--------------------------------------------------------------------------------------------------------------------------|--------------------------------------------------------------------------------------------------------------------------------------------------------------------------------------------------------------------------------------------------------------------------------------------------------------------------------------------------|----------|----------------------------------------------------------------------------------------------------------------------------------|----|
| 259. | N. B. Avdonina,<br>R. H. Pratt,<br>L. V. Chernysheva.                                                                    | Photoionization of excited<br>highly charged ions.                                                                                                                                                                                                                                                                                               | Paper    | 6th International<br>Conference on the<br>Physics of Highly<br>Charged Ions, AIP<br>Conf. Proc. <b>274</b> , p.<br>553-555, 1993 | 3  |
| 260. | V. K. Dolmatov                                                                                                           | Suppression of the $3p \rightarrow nd(n>3)$ resonances in<br>the $3p$ photoabsorption of<br>free Mn and $Mn^+$                                                                                                                                                                                                                                   | Paper    | Phys.Lett. A <b>174</b> 116-<br>118, 1993                                                                                        | 3  |
| 261. | V. K. Dolmatov                                                                                                           | The case of a unique<br>autoionization decay<br>dynamic: the $3p \rightarrow 3d$<br>resonance in Cr                                                                                                                                                                                                                                              | Paper    | J. Phys. B: At. Mol.<br>Opt. Phys. <b>26</b> , L393-<br>L398, 1993                                                               | 6  |
| 262. | V. K. Dolmatov                                                                                                           | Singularity of Cr: $nd$<br>orbital (anti-) collapse                                                                                                                                                                                                                                                                                              | Paper    | J.Phys.B: At. Mol.<br>Opt. Phys. <b>26</b> , L585-<br>L588, 1993                                                                 | 4  |
| 263. | L. V. Chernysheva, N.<br>A. Cherepkov,<br>S. K. Semenov.                                                                 | ATOM XXVIII system. A<br>program for calculating<br>the partial cross sections<br>for photoionization of<br>atoms taking into account<br>correlations in several<br>transitions<br>(In Russian: Система<br>ATOM XXVIII.<br>Программа вычисления<br>парциальных сечений<br>фотоионизации атомов<br>с учетом корреляций в<br>нескольких переходах) | Preprint | Ioffe Institute, №<br>1620. Leningrad,<br>1993                                                                                   | 55 |
| 264. | V.M. Mikushkin ,<br>A.V.Zakharevich<br>I. Pavletsov<br>S.E. Sysoev,<br>V.V. Shnitov<br>M.Yu. Kuchiev<br>S.A. Sheinerman. | Postcollision Interaction<br>in the excitation of a gold<br>$4d$ vacancy by fast<br>electrons                                                                                                                                                                                                                                                    | Paper    | JETP Letters, <b>58</b> , 12,<br>pp. 891 – 894, 1993                                                                             |    |
| 265. | M. Ya. Amusia                                                                                                            | Resonant Structure of the<br>$3d$ -electrons Angular<br>Distribution in a Free<br>$Mn^+$ Ion (with V. K.<br>Dolmatov)                                                                                                                                                                                                                            | Paper    | J. of Phys. B: At.<br>Mol. Opt. Phys., <b>27</b> ,<br>p. L281-285, 1994                                                          | 5  |
| 266. | S. M. Andrievsky,<br>A. V. Yushchenko,<br>L. V. Chernysheva                                                              | Oscillator strengths for<br>heavy atoms: Lu I                                                                                                                                                                                                                                                                                                    | Report   | Newsletter on<br>analysis of<br>astronomical<br>spectra, Darsbery<br>Lab., No 4, p. 25-26,<br>1994                               | 2  |

|      |                                                                                                                                       |                                                                                                                                     |       |                                                                                      |    |
|------|---------------------------------------------------------------------------------------------------------------------------------------|-------------------------------------------------------------------------------------------------------------------------------------|-------|--------------------------------------------------------------------------------------|----|
| 267. | M. Ya. Amusia,<br>N.B. Avdonina,<br>R. H. Pratt                                                                                       | Coherent Correlation<br>Enhancement of Outer<br>Shell Photoionization<br>Cross Sections of Alkali-<br>like Ions                     | paper | J. of Phys. B.:At.<br>Mol. Opt. Phys., <b>27</b> ,<br>p. 5211-5219, 1994             | 9  |
| 268. | V. K. Ivanov,<br>J. B. West,<br>G. F. Gribakin,<br>A .A. Gribakina                                                                    | Photoionization of the<br>2s,2p and 3s subshells of<br>Mg <sup>+</sup> .                                                            | Paper | Zeitsch. fur Phys.D<br><b>29</b> , p.109-114, 1994.                                  | 6  |
| 269. | V. A. Kharchenko,<br>V. K. Ivanov,<br>A. N. Ipatov,<br>M. L. Zhyzhin                                                                  | Size dependence of<br>electronic structure and<br>new type of collective<br>vibrations in small metal<br>clusters                   | Paper | Physical Review A<br><b>50</b> , p. 1459-1464,<br>1994.                              | 6  |
| 270. | V. K. Ivanov,<br>A. N. Ipatov,<br>V. A. Kharchenko,<br>M. L. Zhyzhin                                                                  | Optimized jelly model for<br>metal clusters<br>(In Russian:<br>Оптимизированная<br>модель "желе" для<br>металлических<br>кластеров) | Paper | JETP Letters (in<br>Russian: Письма в<br>ЖЭТФ, <b>60</b> , в.5, с.345-<br>351, 1994) | 7  |
| 271. | V. K. Ivanov,<br>L. P. Krukovskaya                                                                                                    | The effects of intershell<br>interaction and core<br>rearrangement in Ge<br>negative ion<br>photodetachment                         | Paper | Journal of Physics B:<br>At.Mol. Opt.Phys.<br><b>27</b> , p. 4111-4122,<br>1994.     | 12 |
| 272. | R. Kuntze,<br>M. Salzmann,<br>N. Bowering,<br>U. Heinzmann,<br>V. K. Ivanov,<br>N. M. Kabachnik                                       | Spin-polarization<br>spectroscopy of Auger<br>electrons and<br>photoelectrons in 5p<br>ionization of barium<br>atoms                | Paper | Physical Review A<br>1994, V.50, n.1, P.<br>489-495.                                 | 7  |
| 273. | G. F. Gribakin<br>W. A. King                                                                                                          | The effect of virtual<br>positronium formation on<br>positron-atom scattering                                                       | Paper | J. Phys. B: At. Mol.<br>Opt. Phys. <b>27</b> , 2639–<br>2645, 1994.                  | 7  |
| 274. | M.Yu. Kuchiev<br>S.A. Sheinerman.                                                                                                     | PCI Influence On<br>Angular-Distribution Of<br>Auger And<br>Autoionization Electrons                                                | Paper | J. Phys. B: At. Mol.<br>Opt. Phys., <b>27</b> , 14,<br>pp. 2943 – 2951, 1994         |    |
| 275. | U. Koble,<br>L. Kiernan,<br>J. T. Costello,<br>J.-P. Mosnier,<br>E. T. Kennedy,<br>V. K. Ivanov,<br>V. A. Kupchenko<br>M. S. Shendrik | 4f( <sup>1</sup> P) giant dipole<br>resonance in La <sup>3+</sup> .                                                                 | Paper | Physical Review<br>Letters <b>74</b> , 12, p.<br>2188-2191, 1995.                    | 4  |
| 276. | P. Dunne,<br>G. O'Sullivan,<br>V. K. Ivanov                                                                                           | The M-shell<br>photoabsorption<br>spectrum of Ge <sup>2+</sup> .                                                                    | Paper | Journal of Physics B:<br>At.Mol.Opt.Phys. <b>28</b> ,<br>p.1241-1250, 1995.          | 10 |

|      |                                                                                                             |                                                                                                                                                       |                 |                                                                                                                                                                   |    |
|------|-------------------------------------------------------------------------------------------------------------|-------------------------------------------------------------------------------------------------------------------------------------------------------|-----------------|-------------------------------------------------------------------------------------------------------------------------------------------------------------------|----|
| 277. | A. Ehresmann,<br>V. A. Kilin,<br>M. Ya. Amusia,<br>H. Schmoranzer<br>K-H. Schartner                         | Assignment of New<br>Fluorescence Lines from<br>Kr III $4p^3\ 6s/5d$ states<br>observed after excitation<br>of the KrI $3d^9\ 5/2\ 5p$ -<br>resonance | Paper           | J. Phys. B: At. Mol.<br>Opt. Phys, <b>28</b> , p. 965-<br>977, 1995                                                                                               | 13 |
| 278. | M. Ya. Amusia,<br>R. Bruch,<br>L. V. Chernysheva,<br>O. V. Konstantinov                                     | Semiclassical Theory of<br>Single-electron Ionization<br>of inert-gases Atoms by<br>fast Ions                                                         | Paper           | ЖТФ. <b>65</b> , 4, p. 1-8, 4<br>1995 (J.Tech.Phys.<br><b>40</b> , 4, p.291-294,<br>1995)                                                                         | 4  |
| 279. | T. Dohrmann,<br>U. Arp,<br>B. Sonntag,<br>M. Wedowski,<br>F. Weisbarth, P.<br>Zimmermann,<br>V. K. Dolmatov | Giant Resonance and<br>Rydberg Series of Laser<br>Excited Chromium<br>Atoms                                                                           | Talk            | In: AIP Conference<br>Proceedings,<br>Symposium, Eds:<br>Herausgeber H.J.<br>Kluge, J.E.Parks,<br>K.Wendt, Vol. <b>329</b> ,<br>p.415-418, 1995                   | 4  |
| 280. | V. G. Yarzhemsky, A. S.<br>Kheifets,<br>F. P. Larkins                                                       | Linewidth and intensities<br>of satellites in<br>photoelectron spectra in<br>the presence of<br>underlying continuum                                  | Paper           | J. Phys. B, At. Mol.<br>Opt. Phys. <b>28</b> (11), p.<br>2105-2112, 1995.                                                                                         | 8  |
| 281. | V. A. Kilin,<br>A. N. Kharlova,<br>A. Ehresmann,<br>H. Schmoranzer<br>K. H. Schartner                       | Competition between non-<br>correlative visible and<br>correlative fluorescence<br>transitions in Kr III                                              | Paper           | J. Phys. B: At. Mol.<br>Opt. Phys. <b>28</b> , 4123-<br>4132, 1995                                                                                                |    |
| 282. | A. S. Kheifets                                                                                              | Green's function<br>calculation of the satellite<br>spectrum of neon                                                                                  | Paper           | J. Phys. B, <b>28</b> ,<br>3791-3803, 1995                                                                                                                        |    |
| 283. | M. Ya. Amusia                                                                                               | Atoms as Many-Body<br>Systems                                                                                                                         | Invited<br>talk | Physics Reports, <b>264</b> ,<br>1-5, p. 7-26, 1996                                                                                                               |    |
| 284. | M. Ya. Amusia,<br>A. S. Baltenkov, and<br>G. I. Zhuravleva,                                                 | On the Difference in<br>Oscillator Strengths of<br>Inner Shell Excitations in<br>Noble Gases and their<br>Alkali Neighbors                            | Paper           | J. of Phys. B: At. Mol.<br>Opt. Phys., <b>29</b> , L153-<br>156, 1996                                                                                             | 4  |
| 285. | M. Ya. Amusia                                                                                               | Theory of Photoionization:<br>VUV and Soft X-ray<br>Frequency Region                                                                                  | Invited<br>talk | in: <i>Photoionization in<br/>VUV and Soft X-Ray<br/>Energy Region</i> , ed. U.<br>Becker and D.<br>Shirley, New York -<br>London, Plenum<br>Press, p. 1-46, 1996 | 46 |
| 286. | M. Ya. Amusia,<br>L. V. Chernysheva<br>V. K. Ivanov                                                         | Photoionization of atomic<br>Antimony: Multi-<br>transition Calculation in<br>RPAE                                                                    | Paper           | Journal of Electron<br>Spectroscopy and<br>Related Phenomena,<br><b>79</b> , p. 295-298, 1996                                                                     | 4  |

|      |                                                                                              |                                                                                                                                       |                 |                                                                                                                                                                                                                |    |
|------|----------------------------------------------------------------------------------------------|---------------------------------------------------------------------------------------------------------------------------------------|-----------------|----------------------------------------------------------------------------------------------------------------------------------------------------------------------------------------------------------------|----|
| 287. | C. S. Feigerle,<br>R. N. Compton,<br>L. E. Cuellar,<br>N. A. Cherepkov,<br>L. V. Chernysheva | Circular dichroism effects<br>on the photoelectron<br>angular distributions for<br>the 7P and 8P states of<br>Cesium                  | Paper           | Phys. Rev A <b>53</b> , 6, p.<br>4183-89, 1996                                                                                                                                                                 | 7  |
| 288. | V. G. Yarzhemsky,<br>T. Reich,<br>L. V. Chernysheva, R.<br>Streubel,<br>R. J. Szargan.       | Linescape asymmetry<br>parameters in<br>photoelectron spectra                                                                         | Paper           | Journal of Electron<br>Spectroscopy and<br>Related<br>Phenomena, <b>77</b> , 1, 15-<br>24, 1996                                                                                                                | 10 |
| 289. | N. A. Cherepkov,<br>L. V. Chernysheva, V. V.<br>Kuznetsov,<br>S. K. Semenov                  | Photoionization of<br>polarized excited Li<br>atoms                                                                                   | Paper           | Journal of Electron<br>Spectroscopy and<br>Related Phenomena,<br><b>79</b> , p. 275-278, 1996                                                                                                                  | 4  |
| 290. | M. Ya. Amusia,<br>L. V. Chernysheva                                                          | RPAE Calculations of the<br>Isoelectronic Series C <sup>-</sup> , N<br>and O <sup>+</sup> Photoionization<br>Cross Section            | Paper           | Astronomy and<br>Astrophysics<br>Transactions, <b>12</b> , 4,<br>p. 247-261, 1996                                                                                                                              | 15 |
| 291. | M. Ya. Amusia                                                                                | Present and Future of<br>Photoionization Studies<br>(Concluding remarks at<br>the Oji International<br>Seminar on<br>Photoionization) | Invited<br>talk | <i>Atomic and Molecular<br/>Photoionization</i> ,<br>Frontiers Science<br>Series, No. <b>18</b> , ed. A.<br>Yagishita and T.<br>Sasaki, Universal<br>Academy Press, Inc.,<br>Tokyo, Japan. p.383-<br>394, 1996 | 12 |
| 292. | M. Ya. Amusia                                                                                | Many-Body Theory<br>Approach in Calculating<br>Atomic Structure and<br>Processes                                                      | Chapter         | in: <i>Atomic, Molecular<br/>and Optical Physics<br/>Reference Book</i> , ed. G.<br>Drake, AIP<br>Publishing, p. 287-<br>300, 1996                                                                             | 14 |
| 293. | M. Ya. Amusia                                                                                | Many-electron<br>Correlations                                                                                                         | Invited<br>talk | in Atoms and Ions, in:<br><i>Correlations in<br/>Clusters and Related<br/>Systems</i> , ed. J. P.<br>Connerade, World<br>Scientific, Singapore-<br>New Jersey-London-<br>Hong Kong, p. 31-55,<br>1996          | 5  |
| 294. | M. Ya. Amusia                                                                                | Photoionization of Atoms<br>near Inner Shell<br>Thresholds                                                                            | Chapter         | in: <i>Selected Topics in<br/>Electron Physics</i> , ed.<br>H. Kleinpoppen and<br>M. C. Campbell,<br>Plenum Press, New<br>York - London, 1996                                                                  |    |

|      |                                                                      |                                                                                                                                                                                                    |              |                                                                                                                                                                                       |    |
|------|----------------------------------------------------------------------|----------------------------------------------------------------------------------------------------------------------------------------------------------------------------------------------------|--------------|---------------------------------------------------------------------------------------------------------------------------------------------------------------------------------------|----|
| 295. | M. Ya. Amusia                                                        | Atomic Photoionization in the High Frequency Region                                                                                                                                                | Invited talk | Proceedings of the Workshop <i>Atomic Physics with Hard X-rays from High Brilliance Synchrotron Light Sources</i> , Argonne National Laboratory Report /ANL/APS/TM-16, p. 43-63, 1996 | 21 |
| 296. | V. K. Ivanov,<br>A. N. Ipatov,<br>V. A. Kharchenko                   | Optimized jelly model for metal clusters with screened Coulomb interaction.<br>(In Russian: Оптимизированная модель желе для металлических кластеров с экранированным кулоновским взаимодействием) | Paper        | JETP (ЖЭТФ) <b>109</b> , в. 3, с.902-915, 1996)                                                                                                                                       | 14 |
| 297. | V. K. Ivanov,<br>L. P. Krukovskaya, G. Y. Kashenock                  | Near-threshold shape resonance in Cr <sup>-</sup> outer-shell photodetachment.                                                                                                                     | Paper        | Journal of Physics B: At.Mol.Opt.Phys. <b>29</b> , P.L313-L319, 1996.                                                                                                                 | 7  |
| 298. | V. K. Ivanov,<br>G. Y. Kashenock, G. F. Gribakin,<br>A. A. Gribakina | 2s,2p photodetachment from the He-( <sup>4</sup> P) negative ion within the Dyson Equation method.                                                                                                 | Paper        | Journal of Physics B: At.Mol.Opt.Phys. <b>29</b> , P.2669-2687, 1996.                                                                                                                 | 19 |
| 299. | V. K. Ivanov,<br>L. P. Krukovskaya,<br>G. Y. Kashenock               | Resonance structure in photodetachment of Cr <sup>-</sup> negative ion.                                                                                                                            | Report       | Invited talks of the 5th International Workshop "Autoionization phenomena in atoms" (Dubna, 1995). Moscow University Press, p. 30-34, 1996                                            | 5  |
| 300. | V. K. Ivanov,<br>G. Y. Kashenock                                     | Autodetachment resonances in photoabsorption of He <sup>-</sup> and B <sup>-</sup> ions.                                                                                                           | Report       | Invited talks of the 5th International Workshop "Autoionization phenomena in atoms" (Dubna, 1995). Moscow University Press, p. 35-39, 1996.                                           | 5  |

|      |                                                    |                                                                                                                                                                                                               |        |                                                                                                                                             |    |
|------|----------------------------------------------------|---------------------------------------------------------------------------------------------------------------------------------------------------------------------------------------------------------------|--------|---------------------------------------------------------------------------------------------------------------------------------------------|----|
| 301. | V. K. Ivanov,<br>A. N. Ipatov                      | Autoionizing structure in photoabsorption of small metallic clusters.                                                                                                                                         | Report | Invited talks of the 5th International Workshop "Autoionization phenomena in atoms" (Dubna, 1995). Moscow University Press, P. 50-54, 1996. | 5  |
| 302. | V. K. Ivanov                                       | Collective phenomena in negative ion photodetachment.                                                                                                                                                         | Paper  | In book "Correlations in clusters and related systems".Ed. J.-P. Connerade, World Scientific, Singapore, P. 73-91, 1996.                    | 19 |
| 303. | V. K. Ivanov,<br>A. N. Ipatov                      | Many-Body calculations for metallic clusters using the jellium model.                                                                                                                                         | Статья | In the book "Correlations in clusters and related systems".Ed. J.-P. Connerade, World Scientific, Singapore, p. 141-167, 1996.              | 27 |
| 304. | B. D. Agapiev,<br>V. K. Ivanov,<br>A. N. Ipatov    | Elastic scattering of slow electrons by metal clusters. Negative ions. (In Russian: Упругое рассеяние медленных электронов на металлических кластерах. Отрицательные ионы)                                    | Paper  | Izv. USSR Acad. Sci., Ser. Fiz., <b>60</b> , в. 9, с. 7-11, 1996.                                                                           | 5  |
| 305. | V. K. Ivanov,<br>A. N. Ipatov,<br>V. A. Kharchenko | Optimized Jelly Model for Clusters with Screened Coulomb Interaction (In Russian: Оптимизированная модель желе для кластеров с экранированным кулоновским взаимодействием)                                    | Paper  | Izv. USSR Acad. Sci., Ser. Fiz., <b>60</b> , в. 9, с. 43-48, 1996.                                                                          | 6  |
| 306. | V. K. Dolmatov<br>M. M. Mansurov                   | Trends in valence autoionizing Rydbergs for nd <sup>5</sup> semifilled-shell ground and excited atoms and ions: Cr, Mn, Mn <sup>+</sup> , Fe <sup>+</sup> , Fe <sup>2+</sup> , Mo, Tc, Tc <sup>+</sup> and Re | Paper  | J. Phys. B: At. Mol. Opt. Phys. <b>29</b> , L307-L312, 1996                                                                                 | 6  |

|      |                                                                                                                                     |                                                                                                                                                                                           |          |                                                                    |    |
|------|-------------------------------------------------------------------------------------------------------------------------------------|-------------------------------------------------------------------------------------------------------------------------------------------------------------------------------------------|----------|--------------------------------------------------------------------|----|
| 307. | V. K. Dolmatov                                                                                                                      | First theoretical study of the 3p absorption spectrum of free Cr <sup>+</sup>                                                                                                             | Paper    | J. Phys. B: At. Mol. Opt. Phys. <b>29</b> , 18, L673-L676, 1996.   | 4  |
| 308. | V. K. Dolmatov                                                                                                                      | Characteristic features of the 3p absorption spectra of free iron-group elements due to the dublicity of the "inner-valence" 3d electrons. Application to Mn <sup>2+</sup>                | Paper    | J. Phys. B: At. Mol. Opt. Phys., <b>29</b> , 19, L687-L692, 1996.  | 6  |
| 309. | Th. Dohrmann,<br>A. von dem Borne,<br>A. Verweyen,<br>B. Sonntag,<br>M. Wedowski,<br>K. Godehusen,<br>P. Zimmermann,<br>V. Dolmatov | Resonant inner-shell photoelectron spectra of ground state and laser excited Cr atoms                                                                                                     | Paper    | J. Phys. B: At. Mol. Opt. Phys., <b>29</b> , 20, 4641-4658, 1996   | 18 |
| 310. | J. P. Connerade,<br>V. K. Dolmatov                                                                                                  | Inner-shell 3d → 4s and 3p→3d resonances in the photoionization of excited manganese                                                                                                      | Paper    | J. Phys. B: At. Mol. Opt. Phys., <b>29</b> , 23, L831- L835, 1996. | 5  |
| 311. | G. F. Gribakin<br>W. A. King                                                                                                        | Positron scattering from Mg atom                                                                                                                                                          | Paper    | Can. J. Phys. <b>74</b> , 449–59, 1996.                            |    |
| 312. | L.V. Chernysheva V.L. Yakhontov                                                                                                     | The System ATOM - Two-program package to calculate the ground and excited state wave functions in the Hartree-Fock-Dirac approximation                                                    | preprint | Preprint HD-PY 96/06, Heidelberg, Germany, 1996                    | 37 |
| 313. | V. A. Kilin,<br>A Ehresmann,<br>F. Vollweiler,<br>K.-H. Schartner<br>H. Schmoranzer                                                 | Perturbation theory study of triple photoionization: I. Two-step approximations in triple photoionization of Kr in the exciting-photon energy region of Kr I 3d9np resonances (90–100 eV) | Paper    | J. Phys. B: At. Mol. Opt. Phys. <b>30</b> (24), 5715–5727, 1997    | 12 |
| 314. | P. van Kampen,<br>G. O'Sullivan,<br>V. K. Ivanov,<br>A. N. Ipatov,<br>J. T. Costello,<br>E. T. Kennedy                              | Dramatic Changes in the 3s Autoionization Process at the Beginning of the ArI Sequence.                                                                                                   | Paper    | Phys. Rev. Lett., <b>78</b> , 16. p. 3082-3085, 1997               | 4  |
| 315. | G. Yu. Kashenock<br>V. K. Ivanov                                                                                                    | "Collective effects in B-photodetachment".                                                                                                                                                | Paper    | J. Phys.B: At. Mol. Opt. Phys., <b>30</b> , p.4235-53, 1997.       | 19 |

|      |                                                     |                                                                                                                                                                                                       |                 |                                                                                                                                                                                                                                                                                                      |    |
|------|-----------------------------------------------------|-------------------------------------------------------------------------------------------------------------------------------------------------------------------------------------------------------|-----------------|------------------------------------------------------------------------------------------------------------------------------------------------------------------------------------------------------------------------------------------------------------------------------------------------------|----|
| 316. | V. K. Ivanov,<br>A. N. Ipatov,<br>L. P. Krukovskaya | Photodetachment from<br>negative ions with ns <sup>2</sup><br>subshells<br>(In Russian: Фотоотрыв от<br>отрицательных ионов с<br>ns <sup>2</sup> подболочками)                                        | Paper           | Optics and Spectr.<br>(Оптика и Спектр.<br>1997. Т.83, в. 5, с.726-<br>32.)                                                                                                                                                                                                                          | 7  |
| 317. | V. K. Ivanov,<br>A. N. Ipatov.                      | Optimized jelly model for<br>a cluster with screened<br>Coulomb interaction<br>(In Russian:<br>Оптимизированная<br>модель желе для<br>кластера с<br>экранированным<br>кулоновским<br>взаимодействием) | Paper           | Izv. USSR Acad. Sci.,<br>Ser. Fiz., <b>61</b> , в. 9, с.<br>1795-1807, 1997                                                                                                                                                                                                                          | 13 |
| 318. | V. K. Ivanov,<br>A. N. Ipatov,<br>B. D. Agap'ev     | "Correlation effects in<br>many-body calculations<br>for metallic clusters:<br>electron structure,<br>photoabsorption, elastic<br>scattering".                                                        | Report          | Proceedings of SPIE.<br>Int. Workshop on<br>New Approaches to<br>Hi-Tech Materials:<br>Nondestr. Testing<br>and Computer<br>Simulations in<br>Material Science, &<br>Engineering" (1997,<br>St.Petersburg) Ed.<br>A.Melker. V.3345,<br>P.92-97, 1997.                                                | 6  |
| 319. | M. Ya. Amusia                                       | Inner Shell Ionization and<br>Excitation                                                                                                                                                              | Invited<br>talk | in: <i>X-ray and Inner-<br/>Shell Processes</i> , 17th<br>International<br>Conference,<br>Hamburg, Germany<br>September 1996, ed.<br>R. L. Johnson, H.<br>Schmidt-Böking and<br>B. F. Sonntag, AIP<br>conference<br>Proceedings <b>389</b> , AIP<br>Press, Woodbury-<br>New York, p. 415-30,<br>1997 | 16 |
| 320. | M. Ya. Amusia                                       | The Many-body Approach<br>to Electron-atom<br>Collisions                                                                                                                                              | Chapter         | in: <i>Many-body Atomic<br/>Physics</i> , ed. J. J. Boyle<br>and M. S. Pindzola,<br>Cambridge<br>University Press,<br>1997                                                                                                                                                                           |    |
| 321. | V. K. Dolmatov<br>S. T. Manson                      | "Masking" effects in the<br>photoelectron $\beta$ -<br>parameter spectrum                                                                                                                             | Paper           | J. Phys. B: At. Mol.<br>Opt. Phys., <b>30</b> , 15,<br>L517-L521, 1997.                                                                                                                                                                                                                              | 5  |



|      |                                                                         |                                                                                                                                              |       |                                                                                                                            |    |
|------|-------------------------------------------------------------------------|----------------------------------------------------------------------------------------------------------------------------------------------|-------|----------------------------------------------------------------------------------------------------------------------------|----|
| 322. | J. P. Connerade,<br>V. K. Dolmatov                                      | Overlapping resonances in the $\beta$ -parameter spectrum                                                                                    | Paper | J. Phys. B: At. Mol. Opt. Phys., <b>30</b> , 6, L181-L187, 1997.                                                           | 7  |
| 323. | K. Iwata,<br>G. F. Gribakin,<br>R. G. Greaves,<br>C. M. Surko           | Positron annihilation with inner-shell electrons in noble gas atoms                                                                          | Paper | Phys. Rev. Lett., <b>79</b> , 39-42, 1997.                                                                                 |    |
| 324. | V.A. Kilin<br>D.A. Lazarev                                              | Double Auger decay of a 3d vacancy in Krypton                                                                                                | paper | Russ Phys J Optics and Spectroscopy, <b>41</b> , 1001, 1998                                                                |    |
| 325. | M. Ya. Amusia<br>L. V. Chernysheva                                      | System ATOM: Complex of computing Codes to calculate the Characteristics of the Interaction of Atoms and Ions with Electromagnetic Radiation | Paper | Poverkhnost' ("Surface" in Russian), <b>8-9</b> , p. 107, 1998                                                             |    |
| 326. | V. K. Ivanov,<br>L. P. Krukovskaya,<br>G. Yu. Kashenock                 | The evidence of giant " $3p^5 3d^6 4s^2$ " resonance in Cr photodetachment                                                                   | Paper | J. Phys. B: At. Mol. Opt. Phys. <b>31</b> , 2, p.239-247, 1998.                                                            | 9  |
| 327. | A. N. Ipatov,<br>V. K. Ivanov,<br>B. D. Agap'ev,<br>W. Ekardt           | "Exchange and polarization effects in elastic electron scattering by metallic clusters"                                                      | Paper | J. Phys. B: At. Mol. Opt. Phys., <b>31</b> , 4, p.925-934, 1998.                                                           | 10 |
| 328. | A. N. Ipatov,<br>V. K. Ivanov,<br>J. M. Pacheco,<br>W. Ekardt           | "Effects of geometry in elastic scattering and capture of free electrons by $C_{60}$ molecules"                                              | Paper | J. Phys. B: At. Mol. Opt. Phys., <b>31</b> , 11, L511-L517, 1998.                                                          | 7  |
| 329. | G. Yu. Kashenock,<br>V. K. Ivanov                                       | "The $2s^1 2p^4$ autodetachment resonance in the $C^-$ negative ion"                                                                         | Paper | Physics Letters A, <b>245</b> , p. 110-116, 1998.                                                                          | 7  |
| 330. | G. F. Gribakin,<br>V. K. Ivanov,<br>A. N. Korol, and<br>M. Yu. Kuchiev. | "Strong dependence of multiphoton detachment rates on the asymptotic behaviour of the ground-state wavefunction"                             | Paper | J. Phys. B: At. Mol. Opt. Phys. <b>31</b> , 14, L589-L597, 1998.                                                           | 9  |
| 331. | A. N. Ipatov,<br>V. K. Ivanov,<br>B. D. Agap'ev.                        | "Many-Particle Effects in Atomic Clusters"                                                                                                   | Paper | In the book "Physics of clusters". Eds. Lakhno V.D. and Chuev G.N. World Scientific Publishing. Singapore p.224-272, 1998. | 49 |

|      |                                                                     |                                                                                                                          |        |                                                                                                                                                                                                                          |    |
|------|---------------------------------------------------------------------|--------------------------------------------------------------------------------------------------------------------------|--------|--------------------------------------------------------------------------------------------------------------------------------------------------------------------------------------------------------------------------|----|
| 332. | V. K. Ivanov,<br>G. Yu. Kashenock,                                  | Collective effects in resonant negative ion photodetachment                                                              | Report | Proceedings of SPIE. International Workshop on Nondestructive Testing and Computer Simulations in Science and Engineering (NDTCS-98) (8-12 June 1998, St.Petersburg, Russia). Ed. A.Melker. <b>3687</b> , p.90-101, 1998 | 12 |
| 333. | V. K. Dolmatov<br>S. T. Manson                                      | On the dependence of inner-shell photoionisation on the outer-shell structure of the Mn ion                              | paper  | J. Phys.B: At. Mol. Opt. Phys., <b>31</b> , 999-1001, 1998                                                                                                                                                               | 3  |
| 334. | J.-P. Connerade,<br>V. K. Dolmatov                                  | Controlling orbital collapse from inside and outside a transition element                                                | paper  | J.Phys.B: At. Mol. Opt. Phys., <b>31</b> , p. 3557-3564, 1998                                                                                                                                                            | 8  |
| 335. | V. K. Dolmatov<br>S. T. Manson                                      | Photoionization experiments yielding "complete" information                                                              | paper  | Phys. Rev. A <b>58</b> , R2635-2637, 1998                                                                                                                                                                                | 4  |
| 336. | S. K. Semenov,<br>N. A. Cherepkov.                                  | Generalization of the atomic RPA method for diatomic molecules: H <sub>2</sub> photoionization cross section calculation | paper  | Chem. Phys. Lett. <b>291</b> , 375-380, 1998                                                                                                                                                                             | 6  |
| 337. | V.A. Kilin<br>D.A. Lazarev                                          | Double Auger decay of the 3d-vacancy in Kr                                                                               | paper  | Izvestiya Vysshikh Uchebnykh Zavedenij, Fizika, <b>41</b> (10), 54-63 1998                                                                                                                                               | 10 |
| 338. | V. K. Ivanov                                                        | Many-body effects in negative ion photodetachment                                                                        | Обзор  | J. Phys. B: At. Mol. Opt. Phys., <b>32</b> , 12, R67-R101, 1999                                                                                                                                                          | 35 |
| 339. | G. F. Gribakin,<br>V. K. Ivanov,<br>A. V. Korol',<br>M. Yu. Kuchiev | "Two-photon detachment of electrons from halogen negative ions"                                                          | Статья | J. Phys. B: At. Mol. Opt. Phys., <b>32</b> , p. 5463-5478, 1999                                                                                                                                                          | 16 |
| 340. | M. Ya. Amusia,<br>A. S. Baltenkov,<br>Z. Felfli,<br>A. Z. Msezane   | Large Non-Dipole Correlation Effects near Atomic Photoionization Thresholds                                              | paper  | Phys. Rev. A, <b>59</b> , 4, p. R1-4, 1999                                                                                                                                                                               | 4  |

|      |                                                                                                               |                                                                                                                                                                                         |       |                                                                                                                                                                         |    |
|------|---------------------------------------------------------------------------------------------------------------|-----------------------------------------------------------------------------------------------------------------------------------------------------------------------------------------|-------|-------------------------------------------------------------------------------------------------------------------------------------------------------------------------|----|
| 341. | M. Ya. Amusia,<br>Z. Chen and<br>A. Z. Msezane                                                                | Generalized Oscillator<br>strength for the Argon<br>3p <sup>6</sup> -3p <sup>5</sup> 4s transition:<br>Correlation and Exchange<br>Effects on Characteristic<br>minimum                 | paper | Phys. Rev. A, <b>60</b> , 6, p. 3<br>5115-5117, 1999                                                                                                                    | 3  |
| 342. | G. H. Fecher,<br>J. Braun,<br>N. A. Cherepkov,<br>L. V. Chernysheva, Th.<br>Jentsch et al.                    | Dichroism in Angular<br>Resolved VUV-<br>Photoemission from the<br>(0001) Surfaces of Thin<br>Gd and Nd Films<br>Epitaxially Grown on<br>W(110)                                         | paper | Eur.Phys.J. B, <b>11</b> , 1, p. 15<br>161-175, 1999                                                                                                                    | 15 |
| 343. | L. V. Chernysheva,<br>V. L. Yakhontov.                                                                        | Two-program package to<br>calculate the ground and<br>excited state wave<br>functions in the Hartree-<br>Fock-Dirac<br>approximation                                                    | paper | Computer Physics<br>Communications,<br><b>119</b> , 2-3, p. 232-255,<br>1999                                                                                            | 24 |
| 344. | M. Ya. Amusia and L. V.<br>Chernysheva,                                                                       | Many-electron Effects in<br>Atomic Processes                                                                                                                                            | paper | Zh. Tech. Fiz., <b>69</b> , p. 5<br>31-35, 1999                                                                                                                         | 5  |
| 345. | M. Ya. Amusia and<br>L. V. Chernysheva                                                                        | The Evolution in<br>Understanding of the<br>Atomic Structure: from<br>Mendeleev till today                                                                                              | paper | In: <i>Petersburg<br/>Academy of Sciences<br/>among Other<br/>Academies of the<br/>World, St. Petersburg,<br/>Russian Academy of<br/>Sciences</i> , p. 218-230,<br>1999 | 13 |
| 346. | A. De Fanis,<br>J. B. West,<br>K. J. Ross,<br>K. Ueda,<br>H.-J. Beyer,<br>M. Ya. Amusia,<br>L. V. Chernysheva | An Experimental and<br>Theoretical Study of the<br>3p Photoionization of Ca<br>based on a Measurement<br>of the Angular<br>Correlation between<br>Photoelectrons and Auger<br>Electrons | paper | J. of Phys. B: At. Mol.<br>Opt. Phys., <b>32</b> , 24, p.<br>5739-5750, 1999                                                                                            | 12 |
| 347. | W. R. Johnson,<br>A. Derevianko,<br>K. T. Cheng,<br>V. K. Dolmatov,<br>S. T. Manson                           | Nondipole effects in the<br>photoionization of Ne:<br>Random Phase<br>Approximation                                                                                                     | paper | Phys. Rev. A <b>59</b> , 5, p. 5<br>3609-13, 1999                                                                                                                       | 5  |
| 348. | J.-P. Connerade,<br>V. K. Dolmatov,<br>P. A. Lakshmi,<br>S. T. Manson                                         | Electron structure of<br>endohedrally confined<br>atoms: Hydrogen in an<br>attractive shell                                                                                             | paper | J. Phys. B: At. Mol.<br>Opt. Phys., <b>32</b> , L239-<br>45, 1999.                                                                                                      | 7  |
| 349. | V. K. Dolmatov<br>S. T. Manson                                                                                | Enhanced nondipole<br>effects in low-energy<br>photoionization                                                                                                                          | paper | Phys. Rev. Lett., <b>83</b> , 5, 4<br>p. 939-942, 1999                                                                                                                  | 4  |

|      |                                                                                                                          |                                                                                                                                |       |                                                                                                                                                                                                     |    |
|------|--------------------------------------------------------------------------------------------------------------------------|--------------------------------------------------------------------------------------------------------------------------------|-------|-----------------------------------------------------------------------------------------------------------------------------------------------------------------------------------------------------|----|
| 350. | J.-P. Connerade,<br>V. K. Dolmatov<br>S. T. Manson                                                                       | A unique situation for an<br>endohedral<br>metallofullerene                                                                    | paper | J. Phys. B: At. Mol.<br>Opt. Phys., <b>32</b> , 14,<br>L395-403, 1999.                                                                                                                              |    |
| 351. | N.B. Avdonina                                                                                                            | Energy losses for<br>Bremsstrahlung from<br>Atomic Ions                                                                        | paper | Physica Scripta T80,<br>276-277, 1999                                                                                                                                                               | 2  |
| 352. | Z. Chen and<br>A. Z. Msezane                                                                                             | Generalized oscillator<br>strength for the Na 3s-3p<br>transition                                                              | paper | Phys. Rev. A, <b>61</b> ,<br>030703 (R), 2000                                                                                                                                                       | 4  |
| 353. | M. Ya. Amusia,<br>N. A. Cherepkov,<br>L. V. Chernysheva<br>S. T. Manson                                                  | Multielectron Effects in<br>Xe <sup>++</sup> formation resulting<br>from the Photoionization<br>of Xe <sup>+</sup> Ions        | paper | J. of Phys. B: At. Mol.<br>Opt. Phys., <b>33</b> , 1,<br>L37-42, 2000                                                                                                                               | 6  |
| 354. | M. Ya. Amusia,<br>N. A. Cherepkov,<br>L. V. Chernysheva<br>S. T. Manson                                                  | Photoionization of the<br>Iodine Atom and its Ions                                                                             | paper | Phys. Rev. A <b>61</b> , 2,<br>R020701, 2000                                                                                                                                                        |    |
| 355. | M. Ya. Amusia,<br>A. S. Baltenkov<br>U. Becker                                                                           | Strong Oscillations in the<br>Photoionization of 5s-<br>electrons in the<br>Endohedral Atom<br>Xe@C60                          | paper | Phys. Rev. A <b>62</b> , 1,<br>012701, 2000                                                                                                                                                         |    |
| 356. | M. Ya. Amusia,<br>L. V. Chernysheva,<br>V. K. Ivanov                                                                     | On the Photoabsorption of<br>Atomic Eu, Eu <sup>+</sup> and Eu <sup>++</sup><br>in the vicinity of 4d<br>Threshold             | paper | Radiation Physics<br>and Chemistry, <b>59</b> ,<br>2, 137-144, 2000                                                                                                                                 | 8  |
| 357. | M. Ya. Amusia,<br>V. A. Kilin,<br>D. A. Lazarev,<br>Dm. A. Lazarev,<br>K.-H. Scharfner,<br>A. Ehresmann,<br>H. Schmoranz | State selective Single-<br>photon Double-ionization<br>of Ne indicating Singlet-<br>triplet mixing of Doubly<br>excited States | paper | J. Phys. B: At. Mol.<br>Opt. Phys., <b>33</b> , 22, p.<br>4989-5005, 2000                                                                                                                           | 17 |
| 358. | M. Ya. Amusia                                                                                                            | Electron correlations in the<br>High Frequency Photo-<br>Atomic Processes                                                      | paper | Physics Essays, <b>13</b> , 2-<br>3, p. 444-452, 2000                                                                                                                                               | 9  |
| 359. | M. Ya. Amusia, and L.<br>V. Chernysheva                                                                                  | The system of computing<br>codes ATOM: results and<br>possibilities                                                            | paper | In: "Atomic and<br>Molecular Data for<br>Astrophysics",<br>Proceedings of a<br>colloquium,<br>Moscow, Russia,<br>June 2000, eds.<br>A.Kholtygin, V.<br>I.Ochkur,<br>St.Petersburg, p.7-<br>11, 2000 | 5  |
| 360. | G. F. Gribakin,<br>V. K. Ivanov,<br>A. V. Korol,<br>M. Yu. Kuchiev                                                       | Three-photon detachment<br>of electrons from the<br>fluorine negative ion                                                      | paper | J. Phys. B: At. Mol.<br>Opt. Phys., <b>33</b> , 4,<br>p.821-828, 2000.                                                                                                                              | 8  |

|      |                                                                                          |                                                                                                                                                         |       |                                                                                                                                                                                                                                                                                |    |
|------|------------------------------------------------------------------------------------------|---------------------------------------------------------------------------------------------------------------------------------------------------------|-------|--------------------------------------------------------------------------------------------------------------------------------------------------------------------------------------------------------------------------------------------------------------------------------|----|
| 361. | V. K. Ivanov,<br>G. Yu. Kashenock,<br>K. V. Lapkin                                       | “Resonance<br>Photodetachment of Sn <sup>-</sup><br>negative ion”                                                                                       | paper | In Third Int.<br>Workshop on<br>Nondestructive<br>Testing and<br>Computer<br>Simulations in<br>Science and<br>Engineering. A.I.<br>Melker, Editor.<br>Proceedings of SPIE.<br>V.4064, p. 97-104<br>(2000).                                                                     | 8  |
| 362. | V. K. Ivanov.                                                                            | “Theory of<br>Photodetachment from<br>Negative Ions”                                                                                                    | paper | In the book “The<br>physics of electronic<br>and atomic<br>collisions. XXI Int.<br>Conference. Sendai,<br>Japan 1999. Eds Yu.<br>Itikawa, K.Okuno,<br>H.Tanaka,<br>A.Yagishita,<br>M.Matsuzawa.<br>American Institute<br>of Physics. Melville,<br>New York. p. 87-101,<br>199. | 15 |
| 363. | J.-P. Connerade,<br>V. K. Dolmatov,<br>Lakshmi P A                                       | The filling of shells in<br>compressed atoms                                                                                                            | paper | J. Phys. B:<br>At.Mol.Opt.Phys., <b>33</b> ,<br>, 2, p. 251-264, 2000.                                                                                                                                                                                                         | 14 |
| 364. | J.-P. Connerade,<br>V. K. Dolmatov, and S.<br>T. Manson                                  | Controlled strong non-<br>dipole effects in<br>photoionization of<br>confined atoms                                                                     | paper | J. Phys. B: At. Mol.<br>Opt. Phys., <b>33</b> , 7,<br>L275-L282, 2000                                                                                                                                                                                                          | 8  |
| 365. | J. P. Connerade,<br>V. K. Dolmatov<br>S. T. Manson                                       | On the nature and origin<br>of confinement<br>resonances                                                                                                | paper | J. Phys. B: At. Mol.<br>Opt. Phys., <b>33</b> , p.<br>2279-2285, 2000.                                                                                                                                                                                                         | 7  |
| 366. | N. A. Cherepkov,<br>S. K. Semenov,<br>Y. Hikosaka,<br>K. Ito, S. Motoki,<br>A. Yagishita | Manifestation of Many-<br>Electron Correlations in<br>Photoionization of the K<br>Shell of N <sub>2</sub>                                               | paper | Phys. Rev. Lett., <b>84</b> ,<br>250-253, 2000                                                                                                                                                                                                                                 | 4  |
| 367. | S. K. Semenov,<br>N. A. Cherepkov,<br>G. Fecher,<br>G. Schönhense                        | Generalization of the<br>atomic random phase<br>approximation for<br>diatomic molecules: N <sub>2</sub><br>photoionization<br>crosssection calculations | paper | Phys. Rev., A <b>61</b> ,<br>032704, 2000                                                                                                                                                                                                                                      |    |

|      |                                                                                   |                                                                                                                                                                      |       |                                                                                                                                                                                                                       |    |
|------|-----------------------------------------------------------------------------------|----------------------------------------------------------------------------------------------------------------------------------------------------------------------|-------|-----------------------------------------------------------------------------------------------------------------------------------------------------------------------------------------------------------------------|----|
| 368. | A.G. Lyalin,<br>S.K.Semenov ,<br>A.V. Solov'yov , N.A.<br>Cherepkov<br>Greiner W. | Hartree-Fock deformed<br>jellium model for metallic<br>clusters                                                                                                      | paper | J. Phys. B: <b>33</b> (2000)<br>3653-3664                                                                                                                                                                             | 12 |
| 369. | Zhifan Chen and Alfred<br>Z Msezane                                               | Minima and maxima in<br>generalized oscillator<br>strengths of Ne, Kr and<br>Xe                                                                                      | paper | J. Phys. B: At. Mol.<br>Opt. Phys. <b>33</b> , 5397–<br>5402, 2000                                                                                                                                                    | 6  |
| 370. | V. K. Ivanov,<br>G. Yu. Kashenock,<br>K. V. Lapkin                                | Rearrangement effects in<br>inner-shell<br>photodetachment from<br>Sn- negative ion                                                                                  | paper | Forth Int. Workshop<br>on Nondestructive<br>Testing and<br>Computer<br>Simulations in<br>Science and<br>Engineering<br>(NDTCS-2000). A.I.<br>Melker, Editor.<br>Proceedings of SPIE.<br><b>4348</b> , p. 92-97 (2001) | 6  |
| 371. | V. K. Ivanov,<br>G. Yu. Kashenock,<br>R. G. Polozkov                              | "LDA spherical jellium<br>model for a fullerene C <sub>60</sub><br>molecule as a basis for the<br>many-body theory of<br>photoionization and<br>electron scattering" | paper | Там же.<br>Proceedings of SPIE.<br>V. <b>4348</b> , p. 98-102<br>(2001)                                                                                                                                               | 5  |
| 372. | N.T.Bagraev,<br>V.K.Ivanov,<br>L.E.Klyachkin,<br>A.M.Malyarenko,<br>I.A.Shelykh   | "Ballistic quantum wire<br>conductance at nonzero<br>temperature and finite<br>longitudinal bias"                                                                    | paper | Там же.<br>Proceedings of SPIE.<br>V. <b>4348</b> , p. 112-118<br>(2001)                                                                                                                                              | 7  |
| 373. | P.Andersen,<br>T.Andersen,<br>F.Folkmann,<br>V.K.Ivanov,<br>H.Kjeldsen, J.B.West  | "Absolute cross sections<br>for the photoionization of<br>4d electrons in Xe <sup>+</sup> and<br>Xe <sup>2+</sup> ions"                                              | paper | J.Phys.B: At. Mol.<br>Opt. Phys. 2001.<br>V. <b>34</b> , n.10, p. 2009-<br>2019                                                                                                                                       | 10 |
| 374. | V. K. Ivanov,<br>G. Yu. Kashenock,<br>R. G. Polozkov,<br>A. V. Solov'yov.         | "Photoionization cross<br>sections of the fullerenes<br>C <sub>20</sub> and C <sub>60</sub> calculated in a<br>simple spherical model"                               | paper | J.Phys.B: At.Mol.Opt.<br>Phys. 2001. V. <b>34</b> ,<br>n.21, p. 669-677                                                                                                                                               | 8  |
| 375. | V. K. Dolmatov and S. T.<br>Manson                                                | Large nondipole<br>parameters with strong<br>correlation effects in<br>photoelectron angular<br>distributions at kilo-<br>electron-volt energies                     | paper | Phys. Rev. A <b>63</b><br>p.022704, 2001                                                                                                                                                                              |    |
| 376. | V. K. Dolmatov,<br>A.S. Baltenkov ,<br>S.T. Manson                                | Strong correlation effects<br>in photoelectron angular<br>distributions far above<br>thresholds                                                                      | paper | Phys. Rev. A <b>64</b><br>p.042718, 2001                                                                                                                                                                              |    |

|      |                                                                                           |                                                                                                                                                                                                                                                                    |       |                                                                                                                                                                                                                   |    |
|------|-------------------------------------------------------------------------------------------|--------------------------------------------------------------------------------------------------------------------------------------------------------------------------------------------------------------------------------------------------------------------|-------|-------------------------------------------------------------------------------------------------------------------------------------------------------------------------------------------------------------------|----|
| 377. | I. A. Shelykh,<br>N. T. Bagraev,<br>V. K. Ivanov,<br>L. E. Klyachkin                      | "Spontaneous spin<br>polarisation in 1D<br>electron gas"                                                                                                                                                                                                           | paper | Fifth Int. Workshop<br>on Nondestructive<br>Testing and<br>Computer<br>Simulations in<br>Science and<br>Engineering<br>(NDTCS-2001). A.I.<br>Melker, Editor.<br>Proceedings of SPIE.<br>V.4627, P.38-42<br>(2002) | 5  |
| 378. | V. K. Ivanov,<br>G. Yu. Kashenock,<br>C. V. Lapkin                                        | "Feshbach resonances in<br>Si-, Ge- and Sn- negative<br>ion photodetachment"                                                                                                                                                                                       | paper | Там же.<br>Proceedings of SPIE.<br>V.4627, P.43-48<br>(2002)                                                                                                                                                      | 6  |
| 379. | V. K. Ivanov,<br>M. A. Koulov                                                             | "Photoionization cross<br>section of $4s^2 4p^6$ shells in<br>the vicinities of the<br>$4s 4p^6 np$ autoionizing<br>resonances in Kr<br>isoelectronic sequence"                                                                                                    | paper | Там же.<br>Proceedings of SPIE.<br>V.4627, P.93-98<br>(2002)                                                                                                                                                      | 6  |
| 380. | V. K. Ivanov                                                                              | Development of ideas<br>about the atomic<br>photoelectric effect<br>(In Russian: Развитие<br>представлений об<br>атомном фотоэффекте)                                                                                                                              | paper | Scientific and<br>technical statements<br>of SPbSTU<br>(In Russian: Научно-<br>технические<br>ведомости<br>СПбГТУ. 2001. Т.4<br>(26). С.61-70)                                                                    | 10 |
| 381. | V. K. Ivanov,<br>G. Yu. Kashenock,<br>C. V. Lapkin.                                       | Collective resonances in<br>photodetachment<br>processes from negative<br>ions with a half-filled<br>outer shell<br>(In Russian: Резонансы<br>коллективной природы<br>в процессах фотоотрыва<br>от отрицательных ионов<br>с полузаполненной<br>наружной оболочкой) | paper | Scientific and<br>technical statements<br>of SPbSTU<br>(In Russian: Научно-<br>технические<br>ведомости<br>СПбГТУ. 2001. Т.4<br>(26). С.103-111)                                                                  | 9  |
| 382. | M. Ya. Amusia,<br>A. S. Baltenkov,<br>L.V. Chernysheva,<br>Z. Felfli and<br>A. Z. Msezane | Non-dipole Parameters in<br>Angular Distributions of<br>Electrons in<br>Photoionization of Noble<br>Gas Atoms                                                                                                                                                      | paper | Phys. Rev. A, <b>63</b> ,<br>052506, 2001                                                                                                                                                                         |    |

|      |                                                                                                        |                                                                                                       |       |                                                                                                                                                                                                           |    |
|------|--------------------------------------------------------------------------------------------------------|-------------------------------------------------------------------------------------------------------|-------|-----------------------------------------------------------------------------------------------------------------------------------------------------------------------------------------------------------|----|
| 383. | M. Ya. Amusia,<br>A. S. Baltenkov,<br>L.V. Chernysheva,<br>Z. Felfli,<br>A. Z. Msezane,<br>J. Nordgren | Directed Motion of<br>Electrons in Gases under<br>the Action of Photon Flux                           | paper | Phys. Rev. A, <b>63</b> ,<br>052512, 2001                                                                                                                                                                 |    |
| 384. | M. Ya. Amusia,<br>L.V. Chernysheva,<br>Z. Felfli,<br>A. Z. Msezane                                     | Many-Electron Correlation<br>Effects in the Generalized<br>Oscillator Strengths of<br>Noble Gas Atoms | paper | Phys. Rev. A, <b>64</b> ,<br>032711, 2001                                                                                                                                                                 |    |
| 385. | M. Ya. Amusia,<br>A. S. Baltenkov,<br>L. V. Chernysheva,<br>Z. Felfli,<br>A. Z. Msezane                | Collective Behavior in<br>Photoionization of Outer<br>Atomic Subshells of<br>Noble Gas Atoms          | paper | Spectroscopic<br>Challenges of<br>Photoionized<br>Plasmas, ASP<br>Conference Series,<br><b>247</b> , p. 133-136, 2001                                                                                     | 4  |
| 386. | M. Ya. Amusia                                                                                          | Many-Electron<br>Correlations in Photon<br>and Electron Interaction<br>with Atomic Particles          | paper | in: 20 <sup>th</sup> SPIG, <i>The<br/>Physics of Ionized<br/>Gases</i> , Ed. N.<br>Konjevich, Z. L.<br>Petrovich and G.<br>Malovich, Institute<br>of Physics, Belgrade,<br>Yugoslavia, pp.19-<br>40, 2001 | 22 |
| 387. | A.G.Lyalin<br>S.K. Semenov<br>A.V. Solov'yov<br>N.A. Cherepkov<br>J-P. Connerade<br>W. Greiner         | Hartree-Fock deformed<br>jellium calculations for<br>metallic clusters                                | paper | J. Chin. Chem. Soc.,<br><b>48</b> , 419-426, 2001                                                                                                                                                         | 8  |
| 388. | J-P. Connerade<br>A.G.Lyalin<br>R. Semaoune<br>S.K. Semenov<br>A.V. Solov'yov.                         | A simple atomic model for<br>hydrogen confined in<br>prolate-shaped C <sub>60</sub><br>fullerene cage | paper | J. Phys B <b>34</b> , 2505-<br>2511, 2001                                                                                                                                                                 | 7  |
| 389. | N.A.Cherepkov,<br>S.K.Semenov.                                                                         | Non-dipole effects in spin<br>polarization of<br>photoelectrons from Xe<br>4p and 5p shells           | paper | J. Phys. B <b>34</b> , L211-<br>217, 2001                                                                                                                                                                 | 7  |
| 390. | N.A.Cherepkov,<br>S.K.Semenov                                                                          | On quadrupole resonance<br>in atomic photoionization                                                  | paper | J. Phys. B <b>34</b> , L495-<br>L502, 2001                                                                                                                                                                | 7  |
| 391. | M. Ya. Amusia,<br>L. V. Chernysheva,<br>V. K. Ivanov,<br>S. T. Manson                                  | Photoionization of 4d<br>electrons in $I^+$ and $I^{++}$                                              | paper | Phys. Rev. A, <b>65</b> , 3,<br>032714/1-4, 2002                                                                                                                                                          | 4  |
| 392. | M. Ya. Amusia,<br>L. V. Chernysheva,<br>S. T. Manson,<br>A. Z. Msezane,<br>V. Radojevich               | Strong Electron<br>Correlations in<br>Photoionization of Spin-<br>orbit Doublets                      | paper | Phys. Rev. Let., <b>88</b> , 9,<br>093002/1-4, 2002                                                                                                                                                       | 4  |



|      |                                                                                                                               |                                                                                                                                                |       |                                                                                                                           |    |
|------|-------------------------------------------------------------------------------------------------------------------------------|------------------------------------------------------------------------------------------------------------------------------------------------|-------|---------------------------------------------------------------------------------------------------------------------------|----|
| 393. | M. Ya. Amusia,<br>L.V. Chernysheva,<br>Z. Felfli,<br>A. Z. Msezane                                                            | Reinterpretation of the recently measured Absolute Generalized Oscillator Strength for the Ar 3p-4p transition                                 | paper | Phys. Rev. A <b>65</b> (5), 54701-1-4, Part B, 2002                                                                       | 4  |
| 394. | M. Ya. Amusia,<br>L. V. Chernysheva,<br>Z. Felfli,<br>A. Z. Msezane                                                           | Compton Scattering upon Heavy Atoms with Account of Many-Electron Correlations                                                                 | paper | Surface Review and Letters, <b>9</b> (2), 1155-60, 2002                                                                   | 6  |
| 395. | M. Ya. Amusia,<br>L. V. Chernysheva, V. G. Yarzhemsky, V. I. Nefedov                                                          | The Shapes of Photoelectron Satellite Spectra                                                                                                  | paper | Surface Review and Letters, <b>9</b> (2), 1209-12, 2002                                                                   | 4  |
| 396. | M. Ya. Amusia<br>L. V. Chernysheva                                                                                            | New Collective Effects in Atomic Photoionization                                                                                               | paper | in: Proceedings of the International Seminar on Photoionization in Atom (ISPA). Kyoto University Press, pp. 106-111, 2002 | 6  |
| 397. | Zhifan Chen and Alfred Z. Msezane                                                                                             | Correlation effects in the generalized oscillator strength of the magnesium 3 <sup>1</sup> S–3 <sup>1</sup> P transition                       | paper | J. Phys. B: At. Mol. Opt. Phys. <b>35</b> , 815–819, 2002                                                                 | 5  |
| 398. | M. Ya. Amusia,<br>L. V. Chernysheva,<br>Z. Felfli,<br>A. Z. Msezane                                                           | Cross sections of Discrete-level Excitations of Noble-gas Atoms in Compton Scattering                                                          | paper | Phys. Rev. A <b>65</b> (6), 62705-1-8, 2002                                                                               | 8  |
| 399. | M. Ya. Amusia,<br>L. V. Chernysheva<br>V. G. Yarzhemsky                                                                       | Lineshape of Ne 1s photoionization satellite [1s2s]( <sup>3</sup> S)3s and its valence Auger decay Spectrum                                    | paper | Journal of Electron Spectroscopy and Related Phenomena, <b>127</b> (3), 153-9, 2002                                       | 7  |
| 400. | I. A. Shelykh,<br>N. T. Bagraev,<br>V. K. Ivanov,<br>L. E. Klyachkin                                                          | Spontaneous spin polarization of electrons in quantum wires<br>(In Russian: Спонтанная спиновая поляризация электронов в квантовых проволоках) | paper | Semiconductors 2002. T. <b>36</b> , в.1. C.65-73.                                                                         | 9  |
| 401. | N. T. Bagraev,<br>A. D. Buravlev,<br>L. E. Klyachkin,<br>A. M. Malyaremkov,<br>V. Gelkhoff<br>V. K. Ivanov,,<br>I. A. Shelykh | Quantized Conductivity in Silicon Quantum Wires<br>(In Russian: Квантованная проводимость в кремниевых квантовых проволоках)                   | paper | Semiconductors, 2002. T. <b>36</b> , в.4. C.462-483.                                                                      | 22 |

|      |                                                                                                         |                                                                                                                                   |       |                                                            |    |
|------|---------------------------------------------------------------------------------------------------------|-----------------------------------------------------------------------------------------------------------------------------------|-------|------------------------------------------------------------|----|
| 402. | V. K. Dolmatov,<br>J. P. Connerade,<br>A. P. Lakshmi,<br>S. T. Manson                                   | Spectral properties of<br>confined atoms                                                                                          | paper | Surface Review and<br>Letters, 9, no.1, 39-<br>43,<br>2002 | 5  |
| 403. | G. F. Gribakin and<br>J. Ludlow                                                                         | Convergence of partial-<br>wave expansions for<br>energies, scattering<br>amplitudes and positron<br>annihilation rates           | paper | J. Phys. B: At. Mol.<br>Opt. Phys. 35, 339–<br>55, 2002    | 7  |
| 404. | S. J. Brotton,<br>P. McKenna,<br>G. Gribakin,<br>I. D. Williams                                         | Angular distribution for<br>the elastic scattering of<br>electrons from Ar+<br>(3s23p5 2P) above the first<br>inelastic threshold | paper | Phys. Rev. A 66,<br>062706, 2002                           |    |
| 405. | A. S. Kheifets and<br>I. Bray                                                                           | Frozen core model of the<br>double photoionization of<br>beryllium                                                                | paper | Phys. Rev. A,<br>65(1):2710, 2002                          |    |
| 406. | I. Bray,<br>D. V. Fursa,<br>A. S. Kheifets and<br>A. T. Stelbovics                                      | Theory of electrons and<br>photons colliding with<br>atoms                                                                        | paper | J. Phys. B <b>35</b><br>(16):R117-146, 2002                | 30 |
| 407. | A. Lyalin,<br>A. Solov'yov,<br>W. Greiner and<br>S. Semenov                                             | Hartree-Fock approach for<br>metal-cluster fission                                                                                | paper | Phys. Rev. A <b>65</b> ,<br>023201, 2002                   | 5  |
| 408. | S.Motoki,<br>J.Adachi,<br>K.Ito, K.Ishii, K.Soejima,<br>A.Yagishita,<br>S.K.Semenov and<br>.A.Cherepkov | Direct Probe of the Shape<br>Resonance Mechanism in<br>$2\sigma_g$ -Shell<br>Photoionization of the N <sub>2</sub><br>Molecule    | paper | Phys. Rev. Lett. <b>88</b> ,<br>063003, 2002               | 4  |

|      |                                                                                                                                                                                                                                                                                                                                                                                                         |                                                                                                                                                                            |       |                                                           |    |
|------|---------------------------------------------------------------------------------------------------------------------------------------------------------------------------------------------------------------------------------------------------------------------------------------------------------------------------------------------------------------------------------------------------------|----------------------------------------------------------------------------------------------------------------------------------------------------------------------------|-------|-----------------------------------------------------------|----|
| 409. | T. Jahnke,<br>Th.Weber,<br>A. L. Landers,<br>A. Knapp,<br>S. Shossler,<br>J. Nickles,<br>S. Kammer,<br>O. Jagutzki, L. Schmidt,<br>A. Crasch, T. Osipov,<br>E. Arenholz,<br>A. T. Young, R. Diez<br>Muino, D. Rolles, F. J.<br>Garcia de Abajo, C. S.<br>Fadley, M. A. Van<br>Hove,<br>S. K. Semenov,<br>N. A. Cherepkov,<br>J. Rosch, M. H. Prior, H.<br>Schmidt-Böcking,<br>C. L. Cocke,<br>R. Dörner | Circular Dichroism in K-<br>shell Ionization from<br>Fixed-in-Space CO and<br>N <sub>2</sub> Molecules                                                                     | paper | Phys. Rev. Lett. <b>88</b> ,<br>073002, 2002              | 4  |
| 410. | S. Motoki,<br>I. Adachi, K. Ito,<br>K. Ishii, K. Soejima, A.<br>Yagishita,<br>S. K. Semenov<br>N. A. Cherepkov                                                                                                                                                                                                                                                                                          | Complete photoionization<br>experiment in the region<br>of the $2\sigma_g \rightarrow \sigma_u$ shape<br>resonance of the N <sub>2</sub><br>molecule                       | paper | J. Phys. B <b>35</b> , 3801-<br>3819, 2002                |    |
| 411. | S. K. Semenov,<br>N. A. Cherepkov                                                                                                                                                                                                                                                                                                                                                                       | Generalization of atomic<br>RPA method for diatomic<br>molecules. II. N <sub>2</sub> K-shell<br>photoionization                                                            | paper | Phys. Rev. A <b>66</b> ,<br>022708, 2002                  |    |
| 412. | A. V. Golovin and<br>N. A. Cherepkov.                                                                                                                                                                                                                                                                                                                                                                   | Angular distributions of<br>photoelectrons from K-<br>shells of a fixed-in-space<br>CO molecule calculated<br>by the multiple scattering<br>$X\alpha$ method               | paper | J. Phys. B <b>35</b> , 3191,<br>2002                      |    |
| 413. | A. V. Korol,<br>A. G. Lyalin,<br>A. V. Solov'yov,<br>N. B. Avdonina and R.<br>H. Pratt                                                                                                                                                                                                                                                                                                                  | On the stripping<br>approximation in the<br>bremsstrahlung process                                                                                                         | paper | J. Phys. B <b>35</b> , 1199-<br>1210, 2002                | 11 |
| 414. | V. K. Ivanov,<br>K. V. Lapkin,<br>M. A. Koulov.                                                                                                                                                                                                                                                                                                                                                         | Photodetachment of<br>electrons from the 1s shell<br>of a negative lithium ion<br>(In Russian: Фотоотрыв<br>электронов из 1s-<br>оболочки<br>отрицательного иона<br>лития) | paper | JETP Lett (Письма в<br>ЖТФ. 2003. Т.29,<br>в.15, с.9-16.) | 8  |

|      |                                                                       |                                                                                                                                                                                                                                                                |       |                                                                                                                                                                                                                     |        |
|------|-----------------------------------------------------------------------|----------------------------------------------------------------------------------------------------------------------------------------------------------------------------------------------------------------------------------------------------------------|-------|---------------------------------------------------------------------------------------------------------------------------------------------------------------------------------------------------------------------|--------|
| 415. | V. K. Ivanov,<br>G.Yu.Kashenok,<br>R. G. Poloskov,<br>A.V. Solov'ev   | Method for calculating the photoionization cross sections for fullerenes based on the local density approximation and random phases.<br>(In Russian: Метод расчета сечений фотоионизации фуллеренов на основе приближения локальной плотности и случайных фаз) | paper | JETP (ЖЭТФ. 2003. T.123, в.4, с.744–756).                                                                                                                                                                           | 1<br>3 |
| 416. | V. K. Ivanov                                                          | "The Department of Experimental Physics. 100 <sup>th</sup> Anniversary"                                                                                                                                                                                        | paper | Sixth Int. Workshop on Nondestructive Testing and Computer Simulations in Science and Engineering (NDTCS-2002, 10-16 June 2002, St.Petersburg, Russia). Proceedings of SPIE. Ed. A. Melker. 2003. V.5127, P. XV-XIX | 5      |
| 417. | V. K. Ivanov,<br>M. A. Koulov.                                        | "Double-electron excitation effects in the 4s4p <sup>6</sup> np autoionizing resonances in Kr and its isoelectronic ions sequence"                                                                                                                             | paper | ibid. 2003. V. 5127, P.31-36.                                                                                                                                                                                       | 6      |
| 418. | K. V. Lapkin,<br>V. K. Ivanov,<br>M. A.Koulov                         | "Inner-shell photodetachment of lithium negative ion with excitation".                                                                                                                                                                                         | paper | ibid. 2003. V. 5127, P.37-40.                                                                                                                                                                                       | 4      |
| 419. | V. V. Semenikhina, V. K. Ivanov,<br>A. N. Ipatov,<br>C. V. Lapkin     | "Elastic electron scattering on negative lithium ion".                                                                                                                                                                                                         | paper | ibid. 2003. V. 5127, P. 41-43                                                                                                                                                                                       | 3      |
| 420. | I. A. Shelykh,<br>N. T. Bagraev,<br>V. K. Ivanov,<br>L .E. Klyachkin, | "Spin polarisation in low density quantum wires".                                                                                                                                                                                                              | paper | Journal of Superconductivity, 2003. V.16 (2), P. 355-356                                                                                                                                                            | 2      |
| 421. | M. Ya. Amusia,<br>L. V. Chernysheva,<br>Z. Felfli,<br>A. Z. Msezane   | Determination of Discrete Transitions Multipolarity using the Generalized Oscillator Strength                                                                                                                                                                  | paper | Phys. Rev. A 67, 022703-1-8, 2003                                                                                                                                                                                   | 8      |

|      |                                                                                                                   |                                                                                                                                             |       |                                                                     |    |
|------|-------------------------------------------------------------------------------------------------------------------|---------------------------------------------------------------------------------------------------------------------------------------------|-------|---------------------------------------------------------------------|----|
| 422. | D. Davidovich,<br>V. Radojevich,<br>M. Ya. Amusia                                                                 | Near-threshold<br>photoionization of the Xe<br>3d spin-orbit doublet:<br>relativistic, relaxation,<br>and intershell interaction<br>effects | paper | Phys. Rev. A <b>67</b> ,<br>22719-1-6, 2003                         | 6  |
| 423. | M. Ya. Amusia,<br>N. A. Cherepkov,<br>L. V. Chernysheva                                                           | Elastic scattering of Slow<br>Positrons on Atoms                                                                                            | paper | JETP, <b>124</b> , 1(7), pp. 1-<br>9, 2003                          | 9  |
| 424. | M. Ya. Amusia,<br>A. S. Baltenkov,<br>L. V. Chernysheva,<br>Z. Felfli,<br>S. T. Manson,<br>A. Z. Msezane          | On the effect of intra-<br>doublet correlations<br>upon the non-dipole<br>parameters in Xe                                                  | paper | INFN Frascati<br>Physics Series, v.<br><b>XXXII</b> , pp. 3-8, 2003 | 6  |
| 425. | M. Ya. Amusia,<br>A. S. Baltenkov,<br>L. V. Chernysheva,<br>Z. Felfli,<br>S. T. Manson,<br>A. Z. Msezane          | Correlation Structure in<br>Nondipole<br>photoionization                                                                                    | paper | Phys. Rev. A, <b>67</b> (6),<br>60702-1-4, 2003                     | 4  |
| 426. | E. Kanter,<br>R. Krassig,<br>S. H. Southworth,<br>M. Ya. Amusia,<br>L. V. Chernysheva                             | <i>E1 - E2</i> Interference in<br>the VUV photoionization<br>of <i>He</i>                                                                   | paper | Phys. Rev. A, <b>68</b> (1),<br>12714-1-10, 2003                    | 10 |
| 427. | O. Hemmers,<br>R. Guillemin,<br>E. P. Kanter,<br>D. Lindle,<br>M. Ya. Amusia,<br>L. V. Chernysheva <i>et. al.</i> | Dramatic Nondipole<br>effects in low energy<br>photoionization:<br>experimental and<br>theoretical study of Xe5s                            | paper | Phys. Rev. Let.,<br><b>91</b> (5), 053002/1-4,<br>2003              | 4  |
| 428. | V. Radojevich,<br>D. Davidovich,<br>M. Ya. Amusia                                                                 | Near-Threshold<br>Photoionization of the Ba<br>3d Spin-orbit Doublet -<br>some new theoretical<br>results                                   | paper | Balkan Physics<br>Conference<br>Proceedings, pp. 161<br>- 166, 2003 | 6  |
| 429. | V. K. Dolmatov, A.S.<br>Baltenkov ,<br>S.T. Manson                                                                | Enhanced nondipole<br>effects in photoelectron<br>angular distributions<br>near giant dipole<br>autoionizing resonances<br>in atoms         | paper | Phys. Rev. A <b>67</b> ,<br>062714 (1-6), 2003                      | 6  |
| 430. | A. S. Kheifets and<br>I. Bray                                                                                     | Double shake-off model<br>for triple photoionization<br>of beryllium                                                                        | paper | J. Phys. B <b>36</b> (13):<br>L211-L217, 2003                       | 7  |
| 431. | S.K.Semenov,<br>N.A.Cherepkov                                                                                     | Photoionization of the H <sub>2</sub><br>molecule in the random<br>phase approximation                                                      | paper | J. Phys. B <b>36</b> (2003)<br>1409-1422                            | 14 |

|      |                                                                                                                                         |                                                                                                                                                      |       |                                                                                    |    |
|------|-----------------------------------------------------------------------------------------------------------------------------------------|------------------------------------------------------------------------------------------------------------------------------------------------------|-------|------------------------------------------------------------------------------------|----|
| 432. | N.A.Cherepkov,<br>S.K.Semenov,<br>M.Drescher,<br>U.Heinzmann.                                                                           | Resonance enhancement<br>of non-dipole effects in<br>spin polarization of<br>atomic photoelectrons                                                   | paper | J. Phys. B 36 (2003)<br>3063-3078                                                  | 16 |
| 433. | H. Yamaoka,<br>M. Oura, Takahiro K,<br>Mokikawa T, Ito S,<br>Mizumaki M,<br>S.Semenov,<br>N. Cherepkov.<br>N. Kabachnik,<br>T. Mukoyama | Alignment following Au<br>L <sub>3</sub> photoionization by<br>synchrotron radiation                                                                 | paper | J. Phys. B 36 (2003)<br>3889-3897                                                  | 9  |
| 434. | J.Adachi, Hosaka K., S.<br>Furuya , Soejima K,<br>Takahashi M,<br>A.Yagishita,<br>S.K. Semenov,<br>N.A. Cherepkov                       | Shape-Resonance-<br>Enhanced Vibrational<br>Effects in the Angular<br>distributions of C 1s<br>photoelectrons from<br>Fixed-in-Space CO<br>molecules | paper | Phys. Rev. Lett. 91<br>(2003) 163001                                               |    |
| 435. | M. Ya. Amusia,                                                                                                                          | Random phase<br>approximation: from<br>Giant to Intra-doublet<br>resonances                                                                          | paper | Radiation Physics<br>and Chemistry, 70,<br>237-251, 2004                           | 15 |
| 436. | V. F. Gopka,<br>A V. Yushchenko,<br>A. V. Shavrina,<br>D. E. Mkrtichian,<br>A. P. Hatzes,<br>S. M. Andrievsky,<br>L. V. Chernysheva     | On the radioactive shells<br>in peculiar main<br>sequence stars: the<br>phenomenon of<br>Przybylski's star                                           | paper | Proceedings of the<br>International<br>Astronomical Union<br>01; 224:734-742, 2004 | 9  |
| 437. | M. Ya. Amusia,<br>A. S. Baltenkov,<br>L. V. Chernysheva,<br>Z. Felfli,<br>S. T. Manson,<br>A. Z. Msezane                                | Intra-doublet correlation<br>effect in dipole angular<br>anisotropy parameters of<br>3d electrons                                                    | paper | J. Phys. B: At. Mol.<br>Opt. Phys., 37, 937-<br>944, 2004                          | 8  |
| 438. | M. Ya. Amusia,<br>A. S. Baltenkov,<br>V. K. Dolmatov,<br>S. T. Manson,<br>A. Z. Msezane                                                 | <i>Confinement Resonances</i> in<br>Photoelectron Angular<br>distributions from<br>Endohedral atoms                                                  | paper | Phys. Rev. A 70,<br>023201-1-5, 2004                                               | 5  |
| 439. | M. Ya. Amusia,<br>N. A. Cherepkov,<br>L. V. Chernysheva,<br>Z. Felfli,<br>A. Z. Msezane                                                 | On spin polarization of<br>photoelectrons from Xe,<br>Cs, and Ba 3d spin-orbit<br>components                                                         | paper | Phys. Rev. A 70,<br>062709-1-8, 2004                                               | 8  |
| 440. | V. K. Ivanov                                                                                                                            | "Theoretical studies of<br>photodetachment"                                                                                                          | paper | Radiation Physics<br>and Chemistry,<br>2004. V. 70 (1-3), pp.<br>345-370           | 25 |

|      |                                                                           |                                                                                                |       |                                                                                                                                                                                                                                                                                         |   |
|------|---------------------------------------------------------------------------|------------------------------------------------------------------------------------------------|-------|-----------------------------------------------------------------------------------------------------------------------------------------------------------------------------------------------------------------------------------------------------------------------------------------|---|
| 441. | I. A. Shelykh,<br>V. K. Ivanov                                            | "To the development of<br>the transfer matrix<br>formalism"                                    | paper | Phys. Stat. Sol. (c)<br>2004. V. 1 (6), pp.<br>1549-1553                                                                                                                                                                                                                                | 5 |
| 442. | I. A. Shelykh,<br>V. K. Ivanov                                            | "Differential Equation<br>for the Transfer Matrix"                                             | paper | International<br>Journal of<br>Theoretical Physics<br>2004. V. 43, n. 2, pp.<br>477-482                                                                                                                                                                                                 | 6 |
| 443. | C. V. Lapkin,<br>V. K. Ivanov.                                            | "Inner-shell<br>photodetachment of<br>negative ions".                                          | paper | Seventh Int.<br>Workshop on<br>Nondestructive<br>Testing and<br>Computer<br>Simulations in<br>Science and<br>Engineering<br>(NDTCS-2003, 9-15<br>June 2003,<br>St.Petersburg,<br>Russia). Ed. A.I.<br>Melker. Proceedings<br>of SPIE Vol. 5400.<br>(SPIE, Bellingham,<br>2004). P.42-45 | 4 |
| 444. | V. V. Semenikhina,<br>V. K. Ivanov,<br>C. V. Lapkin.                      | "Differential cross<br>section of elastic electron<br>scattering by negative<br>lithium ion"   | paper | ibid. P. 46-49                                                                                                                                                                                                                                                                          | 4 |
| 445. | M. A. Kulov,<br>N. O. Vasetskaya,<br>V. K. Ivanov                         | "Autoionizing $3s \rightarrow np$<br>resonances in neutral<br>potassium and calcium".          | paper | ibid. P. 50-53                                                                                                                                                                                                                                                                          | 4 |
| 446. | N. T. Bagraev,<br>I. A. Shelykh,<br>V.K.Ivanov,<br>L. E. Klyachkin,       | "Spin depolarization in<br>quantum wires polarized<br>spontaneously in zero<br>magnetic field" | paper | Phys. Rev. B. 2004.<br>V. 70, p.p. 155315-<br>1/9.                                                                                                                                                                                                                                      | 9 |
| 447. | V. K. Ivanov,<br>G. Yu. Kashenock,<br>R. G. Polozkov,<br>A. V. Solov'yov. | "Jellium model for<br>photoionization of<br>fullerenes".                                       | paper | Latest Advances in<br>Atomic Cluster<br>Collisions: Fission,<br>Fusion, Electron, Ion<br>and Photon Impact.<br>Eds J.-P. Connerade<br>and A.V. Solov'yov.<br>Imperial College<br>Press. 2004. P. 105-<br>112                                                                            | 8 |
| 448. | V. K. Dolmatov,<br>A. S. Baltenkov,<br>J. P. Connerade,<br>S.T. Manson    | Structure and<br>photoionization of<br>confined atoms                                          | paper | Radiation Physics<br>and Chemistry 2004<br>70 417-433, 2004.                                                                                                                                                                                                                            |   |

|      |                                                                                                                                                                                                                                                                                                |                                                                                                              |       |                                              |    |
|------|------------------------------------------------------------------------------------------------------------------------------------------------------------------------------------------------------------------------------------------------------------------------------------------------|--------------------------------------------------------------------------------------------------------------|-------|----------------------------------------------|----|
| 449. | G. Gribakin and<br>J. Ludlow                                                                                                                                                                                                                                                                   | Many-body theory of<br>positron-atom<br>interactions                                                         | paper | Phys. Rev. A<br><b>70</b> ,032720 (2004)     |    |
| 450. | P. Bolognesi,<br>L. Avaldi,<br>I. Bray, R. Camilloni,<br>M. Coreno,<br>K. Kazansky,<br>A. S. Kheifets,<br>L. Malegat,<br>P. Selles,<br>G. Turri<br>M. Zitnik                                                                                                                                   | The photodouble<br>ionisation of helium and<br>heavier rare gases                                            | paper | Physica Scripta<br><b>T110</b> , 62, 2004    |    |
| 451. | P. Bolognesi,<br>R. Flammini,<br>A. S. Kheifets,<br>I. Bray and<br>L. Avaldi                                                                                                                                                                                                                   | Experimental<br>observation of initial<br>state effects in<br>photodouble ionisation<br>of Ne 2s             | paper | Phys. Rev. A, <b>70</b> ,<br>062715, 2004    |    |
| 452. | N. A. Cherepkov,<br>S. K Semenov,<br>A. V. Golovin,<br>J. Adachi and<br>A. Yagishita                                                                                                                                                                                                           | O K-shell photoemission<br>of CO molecule:<br>comparison between<br>theory and experiment                    | paper | J. Phys. B <b>37</b> , 4803-<br>4815, 2004   | 13 |
| 453. | N. A. Cherepkov,<br>S. K. Semenov                                                                                                                                                                                                                                                              | On a complete<br>experiment on<br>photoionization of atoms                                                   | paper | J. Phys. B <b>37</b> 1267-<br>1272, 2004     | 6  |
| 454. | S. K Semenov,<br>N. A. Cherepkov,<br>T. Jahnke,<br>R. Dörner                                                                                                                                                                                                                                   | Theoretical study of<br>vibrationally resolved<br>photoionization for the<br>C K-shell of the CO<br>molecule | paper | J. Phys. B <b>37</b> (2004)<br>1331-1342     | 12 |
| 455. | T. Jahnke, L. Foucar, J.<br>Titze, R. Wallauer, T.<br>Osipov, E. P. Benis, A.<br>Alnaser, O. Jagutzki,<br>W. Arnold, S.K.<br>Semenov,<br>N. A. Cherepkov,<br>L. Ph. H. Schmidt, A.<br>Czasch,<br>A. Staudte, M.<br>Schöffler, C. L. Cocke,<br>M. H. Prior, H.<br>Schmidt-Böcking, R.<br>Dörner | Vibrationally Resolved<br>K-shell Photoionization<br>of CO with Circularly<br>Polarized Light                | paper | Phys. Rev. Lett. <b>93</b> ,<br>083002, 2004 |    |



|      |                                                                                                     |                                                                                                                                                                                                                              |       |                                                                                          |   |
|------|-----------------------------------------------------------------------------------------------------|------------------------------------------------------------------------------------------------------------------------------------------------------------------------------------------------------------------------------|-------|------------------------------------------------------------------------------------------|---|
| 456. | J. Adachi, K. Hosaka S. Furuya, K. Aima, M. Takahashi A. Yagishita, S. K. Semenov, N. A. Cherepkov. | Angular distribution of vibrationally-resolved C 1s photoelectrons from fixed-in-space CO molecules: vibrational effect in the shape-resonant C 1s photoionization of CO                                                     | paper | J. Electron Spectrosc. & Relat. Phenom., <b>137-140</b> , 243-248, 2004                  | 6 |
| 457. | S. K. Semenov, N. A. Cherepkov, A. DeFanis, Y. Tamenori, M. Kitajima, H. Tanaka, K. Ueda            | Interplay of different partial waves on vibrationally resolved photoionization of the O K shell of the CO molecule                                                                                                           | paper | Phys. Rev. A <b>70</b> , 052504, 2004                                                    |   |
| 458. | V. V. Semenikhina, V. K. Ivanov, K. V. Lapkin.                                                      | Elastic scattering of an electron by a negative lithium ion<br>(In Russian: Упругое рассеяние электрона на отрицательном ионе лития)                                                                                         | paper | ЖТФ (ЖТФ. 2005. Т.75, в.3, с.24-29)                                                      | 6 |
| 459. | M. A. Kulov, N. O. Vasetskaya, V. K. Ivanov.                                                        | "Autoionizing Rydberg series in alkali atoms"                                                                                                                                                                                | paper | Journal of Electron Spectroscopy and Related Phenomena. 2005. V. 144-147, pp. 1219-1221. | 4 |
| 460. | M. A. Kulov, N. O. Vasetskaya, V. K. Ivanov.                                                        | Autoionization resonances in the photoionization cross section of outer p-electrons of alkali metal atoms<br>(In Russian: Автоионизационные резонансы в сечении фотоионизации внешних р-электронов атомов щелочных металлов) | paper | ЖЭТФ Lett (Письма в ЖТФ. 2005. Т. 31, в.9, с.83-88)                                      | 6 |

|      |                                                                                            |                                                                                                            |       |                                                                                                                                                                                                                                                   |   |
|------|--------------------------------------------------------------------------------------------|------------------------------------------------------------------------------------------------------------|-------|---------------------------------------------------------------------------------------------------------------------------------------------------------------------------------------------------------------------------------------------------|---|
| 461. | M. A. Kulov,<br>N. O. Vasetskaya,<br>V. K. Ivanov                                          | "Autoionizing Rydberg series in photoionization cross section of alkali atoms".                            | paper | Eighth Int. Workshop on Nondestructive Testing and Computer Simulations in Science and Engineering (NDTCS-2004, 7-13 June 2004, St.Petersburg, Russia). Ed. A.I. Melker. Proceedings of SPIE Vol. <b>5831</b> . (SPIE, Bellingham, 2005). P.22-25 | 4 |
| 462. | V. V. Semenikhina, V. K. Ivanov,<br>R. G. Polozkov                                         | "Elastic electron scattering by negative metallic cluster ion: $\text{Na}_7^{--}$ "                        | paper | Ibid. P. 26-29                                                                                                                                                                                                                                    | 4 |
| 463. | R. G. Polozkov,<br>V. K. Ivanov,<br>A. V. Solov'yov.                                       | "Photoionization of fullerene ion $\text{C}_{60}^{+}$ "                                                    | paper | J.Phys.B:At. Mol. Opt. Phys. 2005. <b>38</b> , n., 4341-4348                                                                                                                                                                                      | 8 |
| 464. | M. Ya. Amusia,<br>N. A. Cherepkov,<br>L. V. Chernysheva, Z. Felfli,<br>A. Z. Msezane       | On the non-dipole effects in spin polarization of the photoelectrons from 3d electrons of Xe, Cs and Ba    | paper | J. Phys. B, At. Mol. Opt. Phys, <b>38</b> , 1133-1141, 2005                                                                                                                                                                                       | 9 |
| 465. | M. Ya. Amusia,<br>A. S. Baltenkov,<br>L. V. Chernysheva, Z. Felfli,<br>A. Z. Msezane       | Dramatic distortion of 4d Giant resonance by the Fullerenes $\text{C}_{60}$ shell                          | paper | J. Phys. B: At. Mol. Opt. Phys, <b>38</b> , L169-73, 2005                                                                                                                                                                                         | 5 |
| 466. | N. B. Avdonina,<br>D. Fursa,<br>A. Z. Msezane,<br>R. H. Pratt                              | Minima in generalized oscillator strengths of atomic transitions and the approach to the high-energy limit | paper | Phys. Rev. A <b>71</b> , (6) 062711, 2005                                                                                                                                                                                                         | 6 |
| 467. | M. Ya. Amusia,<br>V. G. Yarzhemsky,<br>Yu. A. Teterin,<br>A. Yu. Teterin,<br>V. I. Nefedov | Structure of X-ray Photoelectron 4p-spectra of Xe and Compounds of Cs, Ba, La                              | paper | Surface. X-ray, synchrotron and neutron research (in Russian: Поверхность. Рентгеновские, синхротронные и нейтронные исследования, <b>6</b> , 3-8, 2005)                                                                                          | 6 |

|      |                                                                                                                                              |                                                                                                                                   |       |                                                                                                                                       |   |
|------|----------------------------------------------------------------------------------------------------------------------------------------------|-----------------------------------------------------------------------------------------------------------------------------------|-------|---------------------------------------------------------------------------------------------------------------------------------------|---|
| 468. | M. Ya. Amusia,<br>A. S. Baltenkov,<br>L. V. Chernysheva,<br>Z. Felfli,<br>A. Z. Msezane                                                      | Near-threshold behavior<br>of angular anisotropy<br>parameters in negative<br>ions photo-detachment                               | paper | Phys. Rev. A <b>72</b> ,<br>032727(7), 2005                                                                                           | 7 |
| 469. | V. K. Dolmatov,<br>D. Bailey,<br>S. T. Manson                                                                                                | Gigantic enhancement of<br>atomic nondipole effects:<br>The $3s \rightarrow 3d$ resonance in<br>Ca                                | paper | Phys. Rev. A <b>72</b> ,<br>022718 (1-5), 2005.                                                                                       | 5 |
| 470. | S. K. Semenov,<br>N. A. Cherepkov,<br>A. De Fanis,<br>. Tamenori,<br>M. Kitajima,<br>H. Tanaka,<br>K. Ueda                                   | Vibrationally resolved<br>photoionization of the O<br>K-shell of CO molecule                                                      | paper | Journal of Electron<br>Spectroscopy and<br>Related Phenomena<br><b>144-147</b> , 211-214,<br>2005                                     | 5 |
| 471. | N. B. Avdonina,<br>D. Fursa,<br>A. Z. Msezane,<br>R. H. Pratt                                                                                | Minima of generalized<br>oscillator strengths of<br>atomic transitions and<br>the approach to the high<br>energy limit            | paper | Phys. Rev. A <b>71</b> ,<br>062711, 2005                                                                                              |   |
| 472. | Zhifan Chen and Alfred<br>Z. Msezane                                                                                                         | Random-phase<br>approximation with<br>exchange for the inner-<br>shell electron transitions                                       | paper | Phys. Rev. A <b>72</b> ,<br>050702(R), 2005                                                                                           | 4 |
| 473. | M. Ya. Amusia                                                                                                                                | Many-Body Theory of<br>Atomic Structure and<br>Processes                                                                          | paper | in: <i>Atomic, Molecular<br/>and Optical Physics<br/>Handbook</i> , Second<br>edition, Ed. G.<br>Drake, Springer,<br>Chapter 23, 2006 |   |
| 474. | M. Ya. Amusia,<br>A. S. Baltenkov,<br>L. V. Chernysheva, Z.<br>Felfli,<br>A. Z. Msezane                                                      | Modification of the Xe $4d$<br>Giant Resonance by the<br>$C_{60}$ Shell in Molecular<br>$Xe@C_{60}$                               | paper | Zh. Exp. Teor. Fiz.,<br><b>129</b> , 1, 63-70; JETP,<br><b>102</b> , 1, 53-60, 2006                                                   | 8 |
| 475. | H. Farrokhpour,<br>M. Alagia,<br>L. Avaldi,<br>M. Ya. Amusia,<br>L. V. Chernysheva<br>M. Coreno, M. de<br>Simone, R. Richter, S.<br>Stranges | Observation of the spin-<br>orbit activated<br>interchannel coupling in<br>the $3d$ photoionization of<br>caesium atoms           | paper | J. Phys. B: At. Mol.<br>Opt. Phys. <b>39</b> 765-<br>771, 2006                                                                        | 7 |
| 476. | M. Ya. Amusia,<br>A. S. Baltenkov                                                                                                            | Effect of plasma<br>oscillations of $C_{60}$<br>collectivized electrons on<br>photoionization of<br>endohedral noble-gas<br>atoms | paper | Phys. Rev. A <b>73</b> ,<br>062723, 2006. July<br>11, 2006 issue of<br>Virtual Journal of<br>Nanoscale Science &<br>Technology        |   |

|      |                                                                          |                                                                                                                                                                                                                             |       |                                                                                                                             |    |
|------|--------------------------------------------------------------------------|-----------------------------------------------------------------------------------------------------------------------------------------------------------------------------------------------------------------------------|-------|-----------------------------------------------------------------------------------------------------------------------------|----|
| 477. | M. Ya. Amusia,<br>L. V. Chernysheva,<br>Z. Felfli,<br>A. Z. Msezane      | Generalized Oscillator Strengths for the 3d Electrons of Xe, Cs and Ba: Effects of Spin-Orbit Activated Interchannel Coupling                                                                                               | paper | Phys. Rev. A, <b>73</b> , 062716, 2006                                                                                      |    |
| 478. | M. Ya. Amusia,<br>L. V. Chernysheva                                      | Non-dipole angular anisotropy parameters of photoelectrons from semi-filled shell atoms                                                                                                                                     | paper | J. Phys. B: At. Mol. Opt. Phys., <b>39</b> , 4627-4636, 2006                                                                | 10 |
| 479. | G.Yu.Kashenock,<br>V.K.Ivanov                                            | "Inner-shell photodetachment of C <sup>-</sup> : the dramatic role of dynamical relaxation in collective response"                                                                                                          | paper | J. Phys. B: At. Mol. Opt. Phys. <b>39</b> , n., 1379-1393, 2006                                                             | 15 |
| 480. | P. S. Shternin,<br>V. K. Ivanov,<br>A. G. Suits, and<br>O.S.Vasyutinskii | "The role of intermediate state polarization in determination of vector properties of the ground state using multiphoton excitation"                                                                                        | paper | Phys. Chem. Chem. Phys., <b>8</b> , 2972 – 2984, 2006                                                                       | 13 |
|      | N. B. Avdonina                                                           | Influence of Correlations on the Trajectories of Zeroes of the Matrix Elements for Bound-bound and Bound-free Transitions in Electron Scattering Elements for Bound-bound and Bound-free Transitions in Electron Scattering | paper | Radiation Physics and Chemistry <b>75</b> , 12, 2124–2128, 2006                                                             | 5  |
| 481. | A. V. Solov'yov,<br>V. K. Ivanov and<br>R. G. Polozkov.                  | "Electron - positron quantum droplets".                                                                                                                                                                                     | paper | Eur. Phys. J. D <b>40</b> , 313-316 (Section 'Rapid Notes'), 2006                                                           | 4  |
| 482. | V. K. Ivanov,<br>N. O. Vasetskaya,<br>V. A. Kharchenko                   | Radiative decays of doubly excited states of oxygen and carbon ions (In Russian: Радиационные распады дважды возбужденных состояний ионов кислорода и углерода)                                                             | paper | Scientific and technical statements of SPbSTU (In Russian: Научно-технические ведомости СПбГТУ. Т. 5-1 (47). С.31-39, 2006) | 9  |
| 483. | V. K. Dolmatov and S. T. Manson                                          | Photoionization of atoms encapsulated in endohedral ions A@C60                                                                                                                                                              | paper | Phys. Rev. A <b>73</b> , 013201 (1-5), 2006.                                                                                | 5  |
| 484. | V. K. Dolmatov and S.T. Manson                                           | Strong final-state term-dependence of nondipole photoelectron angular distributions from half-filled shell atoms                                                                                                            | paper | Phys. Rev. A <b>74</b> , 032705 (1-7), 2006.                                                                                | 7  |

|      |                                                                                                                                                                                         |                                                                                                                                                      |       |                                                                  |    |
|------|-----------------------------------------------------------------------------------------------------------------------------------------------------------------------------------------|------------------------------------------------------------------------------------------------------------------------------------------------------|-------|------------------------------------------------------------------|----|
| 485. | L. J. M. Dunlop,<br>G. F. Gribakin                                                                                                                                                      | Many-body theory of<br>gamma spectra from<br>positron-atom<br>annihilation                                                                           | paper | J. Phys. B 39, 1647–<br>1668, 2006                               | 22 |
| 486. | A. Aguilar,<br>J. D. Gillaspay,<br>G. F. Gribakin,<br>R. A. Phaneuf,<br>M. F. Gharaibeh,<br>M. G. Kozlov,<br>J. D. Bozek, and<br>A. L. D. Kilcoyne                                      | Absolute photoionization<br>cross sections for Xe <sup>4+</sup> ,<br>Xe <sup>5+</sup> and Xe <sup>6+</sup> near 13.5<br>nm: Experiment and<br>theory | paper | Phys. Rev. A <b>73</b> ,<br>032717, 2006                         |    |
| 487. | L. J. M. Dunlop and G.<br>F. Gribakin                                                                                                                                                   | Positronium formation<br>from valence and inner<br>shells in noble gas atoms                                                                         | paper | Nucl. Instrum. and<br>Methods B <b>247</b> , 61–<br>67, 2006     | 7  |
| 488. | A. Aguilar,<br>J. D. Gillaspay,<br>G. F. Gribakin,<br>R. A. Phaneuf,<br>M. F. Gharaibeh,<br>M. G. Kozlov,<br>J. D. Bozek, and<br>A. L. D. Kilcoyne                                      | Absolute photoionization<br>cross sections for Xe <sup>4+</sup> ,<br>Xe <sup>5+</sup> and Xe <sup>6+</sup> near 13.5<br>nm: Experiment and<br>theory | paper | Phys. Rev. A <b>73</b> ,<br>032717, 2006                         |    |
| 489. | P. Bolognesi,<br>A. Kheifets,<br>S. Otranto,<br>M. Coreno,<br>V. Feyer,<br>F. Colavecchia,<br>C. R. Garibotti and L.<br>Avaldi                                                          | Photodouble ionisation<br>studies of the Ne ( $2s^2$ )<br>state in unequal energy<br>sharing conditions                                              | paper | J. Phys. B <b>39</b> , 1899,<br>2006                             |    |
| 490. | S K Semenov,<br>N A Cherepkov,<br>M Matsumoto, K<br>Fujiwara, K Ueda, E<br>Kukk, F. Tahara, T.<br>Sunami, H Yoshida, T<br>Tanaka, K. Nakagawa,<br>M. Kitajima, H. Tanaka<br>A. De Fanis | Vibrationally resolved<br>photoionization of the<br>$1\sigma_g$ and $1\sigma_u$ shells of<br>N <sub>2</sub> molecule                                 | paper | J. Phys. B: At. Mol.<br>Opt. Phys. <b>39</b> (2006)<br>375-386   | 12 |
| 491. | K Hosaka,<br>J Adachi1,<br>A V Golovin,<br>M. Takahashi, T.<br>Teramoto, N Watanabe,<br>A Yagishita,<br>S K Semenov,<br>N A Cherepkov                                                   | Non-dipole effects in the<br>angular distribution of<br>photoelectrons from the<br>K-shell of N <sub>2</sub> molecule                                | paper | J. Phys. B: At. Mol.<br>Opt. Phys. <b>39</b> , L25-<br>L34, 2006 | 10 |

|      |                                                                                                                                                                                                                                                               |                                                                                                                                                     |       |                                                                                                                                                                          |    |
|------|---------------------------------------------------------------------------------------------------------------------------------------------------------------------------------------------------------------------------------------------------------------|-----------------------------------------------------------------------------------------------------------------------------------------------------|-------|--------------------------------------------------------------------------------------------------------------------------------------------------------------------------|----|
| 492. | K. Hosaka, J. Adachi, A. V. Golovin, M. Takahashi, T. Teramoto, N. Watanabe, T. Jahnke, Th. Weber, M. Schoffler, L. Schmidt, T. Osipov, O. Jagutzki, A. L. Landers, M. H. Prior, H. Schmidt-Böcking, R. Dörner, A. Yagishita, S. K. Semenov, N. A. Cherepkov. | Nondipole effects in the angular distribution of photoelectrons from the C K shell of the CO molecule                                               | paper | Phys. Rev. A <b>73</b> , 022716, 2006                                                                                                                                    |    |
| 493. | S. K. Semenov, N A Cherepkov, M Matsumoto, T Hatamoto, X-J Liu, G Prümper, T Tanaka, M Hoashino, H Tanaka, F Gel'mukhanov and K Ueda                                                                                                                          | Interference modulation in the vibrationally resolved photoionization of the $1\sigma_g$ and $1\sigma_u$ core levels of the N <sub>2</sub> molecule | paper | J. Phys. B: At. Mol. Opt. Phys. <b>39</b> , L261-L267, 2006                                                                                                              | 7  |
| 494. | Zhifan Chen and Alfred Z Msezane                                                                                                                                                                                                                              | Random-phase approximation with exchange for inner-shell electron transitions: effects of inter-shell correlations                                  | paper | J. Phys. B: At. Mol. Opt. Phys. <b>39</b> , 4355–4363, 2006                                                                                                              | 9  |
| 495. | Zhifan Chen and Alfred Z Msezane                                                                                                                                                                                                                              | Random-phase approximation with exchange for inner-shell electron transitions: effects of inter-shell electron photoionization                      | paper | In: Contemporary Problems in Mathematical Physics, Oct. 2006, Proceedings of the Fourth International Workshop Cotonou, Republic of Benin, 5 – 11 November 2005, 198-211 | 4  |
| 496. | X-J Liu, N. A. Cherepkov, S. K. Semenov, V. Kimberg, F. Gel'mukhanov, G. Prümper, T. Lischke, T. Tanaka, M. Hoshino, H. Tanaka and .K Ueda                                                                                                                    | Young's double-slit experiment using core-level photoemission from N <sub>2</sub> : revisiting Cohen-Fano's two-centre interference phenomenon      | paper | J. Phys. B: At. Mol. Opt. Phys. <b>39</b> , 4801-4817, 2006                                                                                                              | 17 |

|      |                                                                                                                           |                                                                                                                                                                                                                                 |       |                                                                                                                                                                                                 |    |
|------|---------------------------------------------------------------------------------------------------------------------------|---------------------------------------------------------------------------------------------------------------------------------------------------------------------------------------------------------------------------------|-------|-------------------------------------------------------------------------------------------------------------------------------------------------------------------------------------------------|----|
| 497. | N. O. Vasetskaya,<br>V. K. Ivanov                                                                                         | Radiative decays of doubly excited states of heavy ions of the solar wind.<br>(In Russian: Радиационные распады дважды возбужденных состояний тяжелых ионов солнечного ветра)                                                   | paper | In: Automation, informatization, innovation in transport systems (Сборник: Автоматизация, информатизация, инновация в транспортных системах. Ред. Р.Э.Францева. СПб: СПГУВК, 2007. №4, с.73-82) | 10 |
| 498. | A. K. Belyaev,<br>A. I. Toropkin,<br>A. S. Tyukanov,<br>V. K. Ivanov,<br>R. G. Polozkov,<br>A. V. Solov'ev,<br>B. Greiner | Calculations of electronic structures and photoionization cross sections for fullerene C <sub>60</sub> and its ions<br>(In Russian: Расчеты электронных структур и сечений фотоионизации фуллерена C <sub>60</sub> и его ионов) | paper | Physical messenger. Collection of scientific articles.<br>(In Russian: Физический вестник. Сборник научных статей. Выпуск 1. РГПУ им. А.И.Герцена. Санкт-Петербург, 2007. Стр. 3-9)             | 7  |
| 499. | S Sheinerman,<br>P Lablanquie,<br>F Penent                                                                                | Double photoionization near the inner-atomic shell threshold: dynamics of two-electron emission                                                                                                                                 | Paper | J. Phys. B: At. Mol. Opt. Phys. 40 (2007) 1889–1906                                                                                                                                             | 18 |
| 500. | V. K. Ivanov,<br>R. G. Polozkov,<br>A. V. Solov'ev                                                                        | On the possibility of the existence of an electron-positron cluster.<br>(In Russian: К возможности существования электрон-позитронного кластера)                                                                                | paper | Scientific and technical statements of SPbSTU<br>(In Russian: Научно-технические ведомости СПбГТУ. 2007. Т.1 (49). С.233-238)                                                                   | 6  |
| 501. | A.K. Belyaev,<br>V.. K. Ivanov,<br>R. G. Polozkov,<br>A. S. Tiukanov,<br>A. V. Solov'yov,<br>W. Greiner.                  | "Photoabsorption of the Fullerene Ions C <sub>60</sub> <sup>+</sup> and C <sub>60</sub> <sup>++</sup> ".                                                                                                                        | paper | International Journal of Quantum Chemistry. Vol. 107, 2781-2786 (2007).                                                                                                                         | 6  |
| 502. | M. Ya. Amusia,<br>A. S. Baltenkov and L. V. Chernysheva                                                                   | Photoionization of Xe 3d electrons in molecule Xe@C <sub>60</sub> : interplay of intra-doublet and confinement resonances                                                                                                       | paper | Phys. Rev. A75, 043201, 2007                                                                                                                                                                    |    |

|      |                                                                                                                                                                                                                        |                                                                                                              |       |                                                                                    |    |
|------|------------------------------------------------------------------------------------------------------------------------------------------------------------------------------------------------------------------------|--------------------------------------------------------------------------------------------------------------|-------|------------------------------------------------------------------------------------|----|
| 503. | M. Ya. Amusia                                                                                                                                                                                                          | Fast Electron scattering as a tool to study target's structure                                               | paper | Journal of Electron Spectroscopy and Related Phenomena, <b>159</b> , 81–90, 2007   | 10 |
| 504. | M. Ya. Amusia                                                                                                                                                                                                          | Photoionization and vacancy decay of endohedral atoms                                                        | paper | Journal of Electron Spectroscopy and Related Phenomena, <b>161</b> , 112-120, 2007 | 9  |
| 505. | M. Ya. Amusia,<br>L. V. Chernysheva,<br>Z. Felfli,<br>A. Z. Msezane                                                                                                                                                    | Octupole Contributions to the Generalized Oscillator Strengths of Discrete Dipole Transitions in Noble Gases | paper | Phys. Rev. A <b>75</b> , 062703, 2007                                              |    |
| 506. | V. K. Dolmatov,<br>S. T. Manson                                                                                                                                                                                        | Spin-polarized photoelectrons from half-filled shell atoms                                                   | paper | Phys. Rev. A <b>75</b> , 022701(4), 2007                                           | 4  |
| 507. | V. K. Dolmatov,<br>E. Guler,<br>S. T. Manson                                                                                                                                                                           | "Reading" the photoelectron $\beta$ -parameter spectrum in a resonance region                                | paper | Phys. Rev. A Vol.76, 032704(1-5), 2007.                                            | 5  |
| 508. | A. Kheifets,<br>Igor Bray                                                                                                                                                                                              | Valence shell double photoionization of alkaline-earth atoms                                                 | paper | Phys. Rev. A <b>75</b> , 042703, 2007                                              |    |
| 509. | A. Kheifets                                                                                                                                                                                                            | Sequential two-photon double ionization of noble gas atoms                                                   | paper | J. Phys. B <b>40</b> , F313, 2007                                                  |    |
| 510. | S. K. Semenov,<br>V. V. Kuznetsov,<br>N. A. Cherepkov,<br>P. Bolognesi, V. Feyer,<br>A. Lahmam-Bennani,<br>M. E. Staicu<br>Casagrande,<br>L. Avaldi                                                                    | Angular distributions of molecular Auger electrons: The case of C 1s Auger emission in CO                    | paper | Phys. Rev. A <b>75</b> , 032707, 2007                                              |    |
| 511. | T. Jahnke, A. Czasch,<br>M. Schöffler, S. Schössler, M. Kłiasz, J. Titze, K. Kreidi, R. E. Grisenti, A. Staudte, O. Jagutzki, L. Ph. H. Schmidt,<br>S. K. Semenov,<br>N. A. Cherepkov,<br>H. Schmidt-Böcking R. Dörner | Photoelectron and ICD electron angular distributions from fixed-in-space neon dimers                         | paper | J. Phys. B: At. Mol. Opt. Phys. <b>40</b> 2597-2606, 2007                          | 10 |
| 512. | N. A. Cherepkov,<br>V. V. Kuznetsov,<br>S. K. Semenov                                                                                                                                                                  | Resonance behavior of atomic and molecular photoionization amplitudes                                        | paper | Phys. Rev. A <b>76</b> , 012715(1-11), 2007                                        | 11 |



|      |                                                                                                             |                                                                                                                                                                                      |       |                                                                                                                                   |    |
|------|-------------------------------------------------------------------------------------------------------------|--------------------------------------------------------------------------------------------------------------------------------------------------------------------------------------|-------|-----------------------------------------------------------------------------------------------------------------------------------|----|
| 513. | N. A. Cherepkov and S. K. Semenov                                                                           | New developments in the theory of molecular K-shell photoionization                                                                                                                  | paper | Int. J. Quantum Chem. <b>107</b> , 2889-2901, 2007                                                                                | 13 |
| 514. | M. Ya. Amusia, A. S. Baltenkov and L. V. Chernysheva                                                        | Photoionization of 3d electrons of Xe, Cs and Ba endohedral atoms: comparative analyses                                                                                              | Paper | Central European Journal of Physics, <b>6</b> , 1, 14-25, 2008                                                                    | 10 |
| 515. | M. Ya. Amusia, A. S. Baltenkov and L. V. Chernysheva                                                        | Giant Resonances of Endohedral atoms                                                                                                                                                 | Paper | JETP Letters, <b>87</b> , 4, 230-233, 2008                                                                                        | 4  |
| 516. | M. Ya. Amusia, A. S. Baltenkov and L. V. Chernysheva                                                        | On the photoionization of the outer electrons in noble gas endohedral atoms                                                                                                          | Paper | JETP (Zh. Exp. Teor. Fiz.), <b>134</b> , 2(8), 221-230, 2008                                                                      | 10 |
| 517. | F Penent, S Sheinerman, L Andric, P Lablanquie, J Palaudoux, U Becker, M Braune, J Viefhaus and J H D Eland | Dynamics of electron emission in double photoionization processes near the krypton 3d threshold                                                                                      | Paper | J. Phys. B: At. Mol. Opt. Phys. <b>41</b> (2008) 045002                                                                           | 14 |
| 518. | M. Ya. Amusia, A. S. Baltenkov, L. V. Chernysheva                                                           | Photoionization of subvalent electrons in noble gas endohedrals: interference of three resonances                                                                                    | Paper | J. Phys. B: At. Mol. Opt. Phys. <b>41</b> 165201, 2008                                                                            |    |
| 519. | Zhifan Chen and A. Z. Msezane                                                                               | Random-phase approximation with exchange for the photoionization of an atom with an inner open shell                                                                                 | Paper | Phys. Rev. A <b>77</b> , 042703, 2008                                                                                             | 7  |
| 520. | N. O. Vasetskaya, V. K. Ivanov                                                                              | Radiative decays of doubly excited states of oxygen, carbon and nitrogen ions.<br>(In Russian: Радиационные распады дважды возбужденных состояний ионов кислорода, углерода и азота) | Paper | Optics and Spectr. (In Russian: Оптика и спектроскопия. 2008. Т. 105, № 5, с. 726-731)                                            | 6  |
| 521. | N. O. Vasetskaya, V. K. Ivanov                                                                              | Auger decays of doubly excited states of oxygen, carbon, and nitrogen ions<br>(In Russian: Оже-распады дважды возбужденных состояний ионов кислорода, углерода и азота)              | Paper | Scientific and technical statements of SPbSTU<br>(In Russian: Научно-технические ведомости СПбГТУ. 2008. Т. 2 (54). С. 223 – 230) | 8  |

|      |                                                                                             |                                                                                                                                                                                  |              |                                                                                                                                                                                                               |    |
|------|---------------------------------------------------------------------------------------------|----------------------------------------------------------------------------------------------------------------------------------------------------------------------------------|--------------|---------------------------------------------------------------------------------------------------------------------------------------------------------------------------------------------------------------|----|
| 522. | A.K. Belyaev,<br>V.. K. Ivanov,<br>R. G. Polozkov,<br>A. S. Tiukanov,<br>A. V. Solov'yov    | Ionization of C <sub>60</sub> fullerene and its ions upon photoabsorption of photons<br>(In Russian: Ионизации фуллерена C <sub>60</sub> и его ионов при фотопоглощении фотонов) | Paper        | Physical bulletin of scientific articles<br>(In Russian: Физический вестник. Сборник научных статей. Выпуск 2. РГПУ им. А.И.Герцена. Санкт-Петербург, 2008. Стр. 3-10)                                        | 8  |
| 523. | V. K. Ivanov,<br>R. G. Polozkov,<br>A. V. Solov'yov                                         | "Electron-positron clusters: structure and stability".                                                                                                                           | Book chapter | In the book: Latest Advances in Atomic Cluster Collisions. Structure and Dynamics from the Nuclear to the Biological Scale. Eds J.-P.Connerade and A.V. Solov'yov. Imperial College Press. 2008. P.p. 297-310 | 14 |
| 524. | A. V. Verchovtsev,<br>V. K. Ivanov,<br>V. S. Komarov<br>R. G. Polozkov,<br>A. V. Solov'yov. | On the stability of quantum cluster systems<br>(In Russian: О стабильности квантовых кластерных систем)                                                                          | Paper        | Scientific and technical statements of SPbSTU<br>(In Russian: Научно-технические ведомости СПбГПУ, физико-математические науки. 2008, т. 6(67), с.33-42)                                                      | 10 |
| 525. | V. K. Ivanov,<br>I. N. Toptygin                                                             | On the question of the physical interpretation of electromagnetic fields and phenomena<br>(In Russian: К вопросу о физической интерпретации электромагнитных полей и явлений)    | Paper        | Scientific and technical statements of SPbSTU<br>(In Russian: Научно-технические ведомости СПбГПУ. 2008, т. 3(59), с.301-303)                                                                                 | 3  |
| 526. | V. K. Ivanov,<br>I. N. Toptygin                                                             | On the physical interpretation of electromagnetic fields<br>(In Russian: О физической интерпретации электромагнитных полей)                                                      | Paper        | Scientific and technical statements of SPbSTU<br>(In Russian: Научно-технические ведомости СПбГПУ. 2008, т. 3(59), с.306-307)                                                                                 | 2  |

|      |                                                                                                                                                  |                                                                                                                |       |                                                                                                                                                              |   |
|------|--------------------------------------------------------------------------------------------------------------------------------------------------|----------------------------------------------------------------------------------------------------------------|-------|--------------------------------------------------------------------------------------------------------------------------------------------------------------|---|
| 527. | V. K. Dolmatov and S. T. Manson                                                                                                                  | Correlation confinement resonances in endohedral atoms: Xe@C60                                                 | paper | J. Phys. B: At. Mol. Opt. Phys., Vol. 41, p.165001 (4pp), 2008, (also featured in IOP Select, and was one of the most highly ranked papers by the referees). | 4 |
| 528. | V. K. Dolmatov, P. Brewer, S. T. Manson                                                                                                          | Photoionization of atoms confined in giant single-walled and multiwalled fullerenes                            | paper | Physical Review A, Vol.78, 013415 (1-6) [also selected for compilation in Virtual Journal of Nanoscale Science & Technology (August 4, 2008)]                | 6 |
| 529. | P. Bolognesi, G. Bogachev, V. Borovik, S. Veronesi, R. Flammini, E. Fainelli, A. Borovik, C.T. Whelan, H.R.J. Walters, A. Kheifets and L. Avaldi | The ionization of Mg by electron impact at 1000 eV studied by (e,2e) experiments                               | paper | J. Phys. B 41, 015201, 2008                                                                                                                                  |   |
| 530. | A Naja, E M Staicu Casagrande, A Lahmam-Bennani, M. Stevenson, B Lohmann, C Dal Cappello, K Bartschat, A Kheifets, I Bray and D V Fursa          | (e,2e) triple differential cross sections for ionisation beyond helium: the neon case at large energy transfer | paper | J. Phys. B 41, 085205, 2008                                                                                                                                  |   |
| 531. | A Kheifets, A Naja, E M Staicu Casagrande and A Lahmam-Bennani                                                                                   | DWBA-G calculations of electron impact ionization of noble gas atoms                                           | paper | J. Phys. B 41, 145201, 2008 Erratum                                                                                                                          | 1 |
| 532. | Z. Chen and A. Msezane                                                                                                                           | Random Phase Approximation with Exchange for the Photoionization of an Atom with an Inner Open Shell           | paper | Phys. Rev. A 77, 4, 9, Pt. A 042703/1-7, 2008                                                                                                                | 7 |

|      |                                                                            |                                                                                                                                                                                                                     |       |                                                                                                                                                                                        |   |
|------|----------------------------------------------------------------------------|---------------------------------------------------------------------------------------------------------------------------------------------------------------------------------------------------------------------|-------|----------------------------------------------------------------------------------------------------------------------------------------------------------------------------------------|---|
| 533. | Z. Chen and<br>A. Msezane                                                  | Random Phase<br>Approximation with<br>Exchange for the<br>Photoionization of<br>Confined Atoms: Xe in<br>C60 Fullerene                                                                                              | paper | E-Print Archive,<br>Physics: 1-16,<br>arXiv:0811.2185v1[p<br>hysics.atom-ph],<br>2008                                                                                                  |   |
| 534. | V. K. Ivanov,<br>P. I. Yatsyshin.                                          | Resonances in the cross<br>section for the<br>photodetachment of 2p<br>electrons from the<br>negative Na- ion<br>(In Russian: Резонансы в<br>сечении фотоотрыва 2p-<br>электронов от<br>отрицательного иона<br>Na-) | paper | JTP (in Russian:<br>ЖТФ. 2009. т 79. в 1.<br>стр. 10-15)                                                                                                                               | 6 |
| 535. | N. O. Vasetskaya,<br>V. K. Ivanov.                                         | Auger decays of doubly<br>excited states of oxygen,<br>carbon, and nitrogen ions<br>(In Russian: Оже-<br>распады дважды<br>возбужденных<br>состояний ионов<br>кислорода, углерода и<br>азота)                       | paper | JTP Lett (in Russian:<br>Письма в ЖТФ.<br>2009. Т. 35, в. 4, с.<br>38-46)                                                                                                              | 9 |
| 536. | P. I. Yatsyshin,<br>V. K. Ivanov,<br>R. G. Polozkov,<br>A. V. Solov'yov.   | The structure of electron-<br>positron clusters. Hartree-<br>Fock approximation<br>(In Russian: Структура<br>электрон-позитронных<br>кластеров.<br>Приближение Хартри-<br>Фока)                                     | paper | Scientific and<br>technical statements<br>of SPbSTU<br>(In Russian:<br>Научно-<br>технические<br>ведомости<br>СПбГПУ, физико-<br>математические<br>науки. 2009, т. 1(73),<br>с.9 – 17) | 9 |
| 537. | R. G. Polozkov,<br>V. K. Ivanov,<br>A. V. Verkhovtsev,<br>A. V. Solov'yov. | On the stability of<br>metallic hollow cluster<br>systems: jellium model<br>approach                                                                                                                                | paper | Phys. Rev. A., <b>79</b> , 6,<br>063203-1-7, 2009                                                                                                                                      | 7 |

|      |                                                                                                            |                                                                                                                                                                                                                |       |                                                                                                                                                                                              |    |
|------|------------------------------------------------------------------------------------------------------------|----------------------------------------------------------------------------------------------------------------------------------------------------------------------------------------------------------------|-------|----------------------------------------------------------------------------------------------------------------------------------------------------------------------------------------------|----|
| 538. | V. K. Ivanov,<br>M. A. Kulov                                                                               | Multielectronic effects in autoionization states of the isoelectronic sequence of krypton.<br>(In Russian: Многоэлектронные эффекты в автоионизационных состояниях изоэлектронной последовательности криптона) | paper | Scientific and technical statements of SPbSTU<br>(In Russian: Научно-технические ведомости СПбГПУ, физико-математические науки. 2009, 2 (77), с.71 – 83)                                     | 13 |
| 539. | A. V. Verkhovtsev, R. G. Polozkov,<br>V. K. Ivanov,<br>A. V. Solov'yov.                                    | "Stability of metallic hollow cluster systems".                                                                                                                                                                | paper | Physica Scripta 80, 048104, 2009                                                                                                                                                             | 4  |
| 540. | A. K. Belyaev,<br>A. S. Tiukanov,<br>A. I. Toropkin,<br>V. K. Ivanov,<br>R. G. Polozkov,<br>A.V.Solov'yov. | "Photoabsorption of the fullerene C <sub>60</sub> and its positive ions".                                                                                                                                      | paper | Physica Scripta 80, 048121, 2009.                                                                                                                                                            | 5  |
| 541. | P. I. Yatsyshin,<br>R. G. Polozkov,<br>V. K. Ivanov,<br>A. V. Solov'yov.                                   | "Structure of electron-positron clusters: Hartree-Fock approximation".                                                                                                                                         | paper | Physica Scripta 80, 048126, 2009.                                                                                                                                                            | 4  |
| 542. | V. K. Ivanov                                                                                               | Research of multielectron effects in atomic systems at the Department of Experimental Physics<br>(In Russian: Исследования многоэлектронных эффектов в атомных системах на кафедре экспериментальной физики)   | paper | SPbSPU Proceedings<br>(In Russian: Труды СПбГПУ № 511. 2009. Научные направления на физико-механическом факультете СПбГПУ (к 90-летию ФМФ). СПб, изд. Политехнического унив-тета. С. 80–108) | 29 |
| 543. | M. Ya. Amusia,<br>A. S. Baltenkov and L. V. Chernysheva                                                    | Distortion and preservation of Giant resonances in Endohedral Atoms A@C <sub>60</sub>                                                                                                                          | paper | Pis'ma v ZhETF, 89, iss.6, 322-326, JETP Let., 89, iss.6, 275–279, 2009                                                                                                                      | 5  |
| 544. | M. Ya. Amusia and L. V. Chernysheva                                                                        | Endohedral resonances: modification of atomic photoionization by the fullerenes shell                                                                                                                          | paper | Прикладная физика, 5, 21-30, 2009                                                                                                                                                            | 6  |

|      |                                                                                                               |                                                                                                                |               |                                                                                                                                                                            |    |
|------|---------------------------------------------------------------------------------------------------------------|----------------------------------------------------------------------------------------------------------------|---------------|----------------------------------------------------------------------------------------------------------------------------------------------------------------------------|----|
| 545. | M. Ya. Amusia,<br>L. V. Chernysheva<br>E. Z. Liverts                                                          | Photoionization of two-shell endohedral atoms                                                                  | paper         | Phys. Rev. A, <b>80</b> , 032503-1-12, 2009                                                                                                                                | 12 |
| 546. | M. Ya. Amusia,<br>L. V. Chernysheva,<br>E. Z. Liverts                                                         | Photoionization of Onion-type atoms                                                                            | paper         | Pis'ma v ZhETF, <b>90</b> , iss.5, 393-397, JETP Let., iss.5, 350-354, 2009                                                                                                | 5  |
| 547. | V. K. Dolmatov                                                                                                | Photoionization of atoms confined in spherical fullerenes                                                      | Invited paper | In: Theory of Confined Quantum Systems: Part Two, edited by John R. Sabin and Erkki Brandas. Advances in Quantum Chemistry, Vol.58, pp. 13-68 (USA, Academic Press), 2009. | 56 |
| 548. | Zhifan Chen and Alfred Z Msezane                                                                              | Photoionization of the I <sup>+</sup> ion                                                                      | paper         | J. Phys. B: At. Mol. Opt. Phys. <b>42</b> , 165203, 2009                                                                                                                   | 4  |
| 549. | V. K. Dolmatov,<br>G. Craven,<br>E. Guler,<br>D. Keating                                                      | Far above threshold confinement resonances in A@C60 <sup>±</sup> atoms                                         | paper         | J. Phys.: Conf. Series, <b>194</b> , 022025, 2009                                                                                                                          | 1  |
| 550. | V. K. Dolmatov,<br>G. Craven,<br>E. Guler,<br>D. Keating                                                      | Revivification of confinement resonances in the photoionization of A@C60 endohedral atoms far above thresholds | paper         | Phys. Rev. A, <b>80</b> , 035401, 2009. Also selected for inclusion in Virtual Journal J. of Nanoscience & Technology                                                      | 3  |
| 551. | Zhifan Chen and Alfred Z. Msezane                                                                             | Photoionization of the Ce <sup>3+</sup> @C60                                                                   | Talk          | J. Phys.: Conference Series <b>194</b> , 022085, 2009                                                                                                                      | 1  |
| 552. | M. Ya. Amusia                                                                                                 | Simple and Onion-type Fullerenes shells as resonators and amplifiers, Fullerene, Nanotubes, and Carbon         | paper         | Nanostructures, <b>18</b> , part 1, 4-6, 353 – 368, 2010                                                                                                                   | 6  |
| 553. | M. A. Stevenson,<br>L. R. Hargreaves,<br>B. Lohmann, I. Bray, D. V. Fursa,<br>K. Bartschat and<br>A. Kheifets | Fully Differential Cross Section Measurements For Electron Impact Ionization of Neon and Xenon                 | Paper         | Phys. Rev. A <b>79</b> , 012709, 2009                                                                                                                                      |    |

|      |                                                                                                                                                                                                                                                                                                                             |                                                                                                                                        |       |                                                                           |   |
|------|-----------------------------------------------------------------------------------------------------------------------------------------------------------------------------------------------------------------------------------------------------------------------------------------------------------------------------|----------------------------------------------------------------------------------------------------------------------------------------|-------|---------------------------------------------------------------------------|---|
| 554. | J. Hoszowska,<br>A. S. Kheifets,<br>M. Berset, I. Bray, W.<br>Cao,<br>J.-Cl. Dousse,<br>K. Fennane, M. Kavcic,<br>Y. Kayser,<br>J. Szlachetko,<br>M. Szlachetko                                                                                                                                                             | Physical Mechanisms and<br>Scaling Laws of K-shell<br>Double Photoionization                                                           | Paper | Phys. Rev. Lett. 102,<br>073006, 2009                                     |   |
| 555. | A. Kheifets                                                                                                                                                                                                                                                                                                                 | Photoelectron angular<br>correlation pattern in<br>sequential two-photon<br>double ionization of neon                                  | Paper | J. Phys. B <b>42</b> , 134016,<br>2009                                    |   |
| 556. | A. S. Kheifets,<br>I. Bray<br>J. Hoszowska                                                                                                                                                                                                                                                                                  | K-shell double<br>photoionization of Be, Mg<br>and Ca                                                                                  | Paper | Phys. Rev. A <b>79</b> ,<br>042504, 2009                                  |   |
| 557. | A. Kheifets,<br>A. Naja, E. M. Staicu<br>Casagrande<br>A. Lahmam-Bennani                                                                                                                                                                                                                                                    | Energetic (e,2e) reaction<br>away from Bethe ridge:<br>Recoil versus binary                                                            | Paper | J. Phys. B <b>42</b> , 165204,<br>IOP Select<br>Europhysics News,<br>2009 |   |
| 558. | Zhifan Chen and Alfred<br>Z. Msezane                                                                                                                                                                                                                                                                                        | Photoionization of Ce <sup>3+</sup><br>and Ce <sup>3+</sup> @C <sub>60</sub>                                                           | Paper | J. Phys. B: At. Mol.<br>Opt. Phys. <b>42</b> ,<br>165206, 2009            | 6 |
| 559. | A. S. Kheifets,<br>D. V. Fursa,<br>Igor Bray                                                                                                                                                                                                                                                                                | Two-electron<br>photoionization of<br>ground-state lithium                                                                             | Paper | Phys. Rev. A <b>80</b> ,<br>063413, 2009                                  |   |
| 560. | N. A. Cherepkov,<br>S. K. Semenov,<br>M. S. Schöffler, J. Titze,<br>N. Petridis, T. Jahnke,<br>K. Cole, L. Ph. H.<br>Schmidt, A. Czasch, D.<br>Akoury, O. Jagutzki,<br>J. B. Williams, C. L.<br>Cocke, T. Osipov, S.<br>Lee, M. H. Prior, A.<br>Belkacem, A. L.<br>Landers, H. Schmidt-<br>Böcking, Th. Weber, R.<br>Dörner | Separation of Auger<br>transitions into different<br>repulsive states after K-<br>shell photoionization of<br>N <sub>2</sub> molecules | Paper | Phys. Rev. A <b>80</b> ,<br>051404(R), 2009                               |   |
| 561. | Zhifan Chen,<br>A. Z. Msezane                                                                                                                                                                                                                                                                                               | Photoionization of Xe<br>atom confined in C <sub>60</sub><br>fullerene                                                                 | Talk  | Journal of Physics:<br>Conference Series<br>194 022047, 2009              | 1 |
| 562. | P. Bolognesi,<br>L. Avaldi,<br>M. Ya. Amusia,<br>V. G. Yarzhevsky                                                                                                                                                                                                                                                           | A study of the Ne<br>2s2p <sup>5</sup> ( <sup>3</sup> P)3s and 3p<br>correlation satellites up to<br>75 eV above threshold             | Paper | J. Phys. B: At. Mol.<br>Opt. Phys. <b>43</b> ,<br>185304, 2010            |   |

|      |                                                                           |                                                                                                                                                                                                                                                                              |               |                                                                                                                                                               |    |
|------|---------------------------------------------------------------------------|------------------------------------------------------------------------------------------------------------------------------------------------------------------------------------------------------------------------------------------------------------------------------|---------------|---------------------------------------------------------------------------------------------------------------------------------------------------------------|----|
| 563. | A. V. Solov'yov,<br>R. G. Polozkov<br>V. K. Ivanov.                       | "Angle-resolved photoelectron spectra of metal cluster anions within a many-body-theory approach".                                                                                                                                                                           | Paper         | Phys. Rev. A 2010, A <b>81</b> , n. 2, p. 021202(R)                                                                                                           | 3  |
| 564. | R. G. Polozkov,<br>V. K. Ivanov,<br>A. V. Korol',<br>A. V. Solov'yov.     | Theoretical study of the angular distribution of photoelectrons in the processes of photoionization of anions of metal clusters.<br>(In Russian: Теоретическое исследование углового распределения фотоэлектронов в процессах фотоионизации анионов металлических кластеров) | Paper         | Scientific and technical statements of SPbSPU<br>(In Russian: Научно-технические ведомости СПбГПУ, физико-математические науки. 2010, т. 3 (104), с.75 – 80)) | 6  |
| 565. | V. K. Dolmatov,<br>G. Craven,<br>D. Keating                               | Confinement and electron correlation effects in photoionization of atoms in endohedral anions: Ne@C60 <sup>z-</sup>                                                                                                                                                          | Invited paper | J. Phys.: Conf. Series, Vol. 212, 012015, 2010                                                                                                                | 6  |
| 566. | V. K. Dolmatov and S. T. Manson                                           | Interior static polarization effect in A@C60 photoionization                                                                                                                                                                                                                 | Paper         | Phys. Rev. A, Vol. 82, 023422, 2010                                                                                                                           | 3  |
| 567. | J. Ludlow and G. Gribakin                                                 | Many-body theory calculations of positron binding to negative ions                                                                                                                                                                                                           | Paper         | Int. Rev. At. Mol. Phys. 1, 73–83, 2010                                                                                                                       | 11 |
| 568. | A. S. Kheifets,<br>D. V. Fursa, Igor Bray,<br>J. Colgan<br>M. S. Pindzola | Spin effects in angular resolved double photoionization of lithium                                                                                                                                                                                                           | paper         | Phys. Rev. A 81, 023418, 2010                                                                                                                                 |    |
| 569. | A. S. Kheifets,<br>D. V. Fursa, I. Bray, J. Colgan<br>M. S. Pindzola      | Differential cross-sections of double photoionization of lithium                                                                                                                                                                                                             | paper         | Phys. Rev. A 82, 023403, 2010                                                                                                                                 |    |
| 570. | K. Bartschat,<br>A. Kheifets,<br>D. V. Fursa<br>Igor Bray                 | Benchmark calculations for electron impact ionization and ionization-excitation of magnesium                                                                                                                                                                                 | paper         | J. Phys. B 43, 165205, 2010                                                                                                                                   |    |
| 571. | A. S. Kheifets and I. A. Ivanov                                           | Delay in atomic photoionization                                                                                                                                                                                                                                              | paper         | Phys. Rev. Lett 105, 233002, 2010                                                                                                                             |    |



|      |                                                                                                                                                                                                                                                                                                                             |                                                                                                                                                                                            |       |                                                                                                                                                                                            |    |
|------|-----------------------------------------------------------------------------------------------------------------------------------------------------------------------------------------------------------------------------------------------------------------------------------------------------------------------------|--------------------------------------------------------------------------------------------------------------------------------------------------------------------------------------------|-------|--------------------------------------------------------------------------------------------------------------------------------------------------------------------------------------------|----|
| 572. | S. K. Semenov,<br>M. S. Schöffler, J. Titze,<br>N. Petridis, T. Jahnke,<br>K. Cole, L. Ph. H.<br>Schmidt, A. Czasch, D.<br>Akoury, O. Jagutzki, J.<br>B. Williams, C. L.<br>Cocke, T. Osipov, S.<br>Lee, M. H. Prior, A.<br>Belkacem, A. L.<br>Landers, H. Schmidt-<br>Böcking, Th. Weber, N.<br>A. Cherepkov,<br>R. Dörner | Auger decay of $1\sigma_g$ and<br>$1\sigma_u$ hole states of the $N_2$<br>molecule: Disentangling<br>decay routes from<br>coincidence<br>measurements                                      | paper | Phys. Rev. A <b>81</b> ,<br>043426, 2010                                                                                                                                                   |    |
| 573. | N. A. Cherepkov,<br>S. K. Semenov,<br>M. S. Schöffler, J. Titze,<br>N. Petridis, T. Jahnke,<br>K. Cole, L. Ph. H.<br>Schmidt, A. Czasch, D.<br>Akoury, O. Jagutzki, J.<br>B. Williams, T. Osipov,<br>S. Lee, M. H. Prior, A.<br>Belkacem,<br>A. L. Landers,<br>H. Schmidt-Böcking,<br>R. Dörner<br>Th. Weber                | Auger decay of $1\sigma_g$ and<br>$1\sigma_u$ hole states of the $N_2$<br>molecule. II. Young-type<br>interference of Auger<br>electrons and its<br>dependence on<br>internuclear distance | paper | Phys. Rev. A <b>82</b> ,<br>023420, 2010                                                                                                                                                   |    |
| 574. | Z. Chen,<br>R. A. Phaneuf,<br>A. Z. Msezane                                                                                                                                                                                                                                                                                 | Photoionization of the<br>$Ce^{3+}@C_{82}$ Endohedral<br>Fullerene                                                                                                                         | Paper | Jour. of Phys. B:<br>Atomic Molecular &<br>Optical<br>Physics <b>43</b> , 21,<br>215203, November<br>2010                                                                                  |    |
| 575. | A. V. Verkhovtsev, R.<br>G. Polozkov,<br>V. K. Ivanov,<br>A. V. Korol',<br>A. V. Solov'yov.                                                                                                                                                                                                                                 | Study of the electronic<br>structure of inert gas<br>endofullerenes.<br>(In Russian:<br>Исследование<br>электронной структуры<br>эндофуллеренов<br>инертных газов)                         | Paper | Scientific and<br>technical statements<br>of SPbSPU<br>(In Russian:<br>Научно-<br>технические<br>ведомости<br>СПбГПУ, физико-<br>математические<br>науки. 2011, т. 1<br>(116), с. 61 – 70) | 10 |
| 576. | M. Ya. Amusia,<br>L. V. Chernysheva, E.<br>Z. Liverts                                                                                                                                                                                                                                                                       | Qualitative difference<br>between the angular<br>anisotropy parameters in<br>fast electron scattering<br>and photoionization                                                               | Paper | Pis'ma v ZhETF, <b>94</b> ,<br>iss.6, 466-471; JETP<br>Letters, <b>94</b> , No. 6,<br>pp. 431-436, 2011                                                                                    | 6  |

|      |                                                                                           |                                                                                                                        |        |                                                                                                   |    |
|------|-------------------------------------------------------------------------------------------|------------------------------------------------------------------------------------------------------------------------|--------|---------------------------------------------------------------------------------------------------|----|
| 577. | M. Ya. Amusia,<br>L. V. Chernysheva, E.<br>Z. Liverts                                     | Non-dipole effects in<br>angular distributions of<br>secondary electrons in<br>fast particle-atom<br>scattering        | Paper  | arXiv:1012.5465v1,<br>25 December 2010                                                            |    |
| 578. | M. Ya. Amusia                                                                             | Atoms as many-body<br>systems                                                                                          | Review | Journal of Physics:<br>Conference Series,<br><b>321</b> , 012049, 2011                            |    |
| 579. | V. K. Dolmatov,<br>M. Ya. Amusia,<br>L. V. Chernysheva                                    | Confinement and<br>correlation effects in the<br>Xe@C60 generalized<br>oscillator strengths                            | Paper  | Phys. Rev. A, <b>84</b> ,<br>063201-1-6, 2011                                                     | 6  |
| 580. | Zhifan Chen,<br>A. Z. Msezane                                                             | Photoionization of Xe <sup>+</sup> ion<br>confined in C <sub>60</sub> fullerene                                        | Paper  | Canadian Journal of<br>Physics, <b>89</b> (11),<br>1107-1110, 2011                                | 4  |
| 581. | M. Ya. Amusia,<br>L. V. Chernysheva                                                       | On the strong influence of<br>inner shell resonances<br>upon the outer shell<br>photoionization of<br>endohedral atoms | Paper  | Pis'ma v ZhETP, <b>95</b> ,<br>2, 80-83, 2012; JETP<br>Letters, <b>95</b> , No 2, 74-<br>77, 2012 | 4  |
| 582. | S. B. Whitfield,<br>R. Wehlitz,<br>V. K. Dolmatov                                         | Ba 5s photoionization in<br>the region of the second<br>Cooper minimum                                                 | Paper  | J. Phys. B: At. Mol.<br>Opt. Phys., Vol.44,<br>165002 (7pp), 2011                                 | 7  |
| 583. | A. S. Kheifets,<br>I. Bray, J. Colgan<br>M. S. Pindzola                                   | Interference effects in L-<br>shell atomic double<br>photoionization                                                   | Paper  | J. Phys. B 44, 011002,<br>2011                                                                    |    |
| 584. | Z. Chen and<br>A.Z. Msezane                                                               | Photoionization of the Xe<br>atom and Xe@C <sub>60</sub><br>molecule                                                   | Paper  | Eur. Phys. J. D <b>65</b> ,<br>353, 2011                                                          | 4  |
| 585. | M. Ya. Amusia,<br>L. V. Chernysheva,<br>E. Z. Liverts                                     | Angular distributions of<br>secondary electrons in<br>fast particle-atom<br>scattering                                 | Paper  | Phys. Rev. A, <b>85</b> ,<br>042722 -1-12, 2012                                                   | 12 |
| 586. | M. Ya. Amusia,<br>L. V. Chernysheva, E.<br>Z. Liverts                                     | Generalized oscillator<br>strength of endohedral<br>molecules                                                          | Paper  | International<br>Journal of Quantum<br>Chemistry, <b>112</b> , 18,<br>3119-3130, 2012             | 12 |
| 587. | A. V. Verkhovtsev, R.<br>G. Polozkov,<br>V. K. Ivanov,<br>A. V. Korol<br>A. V. Solov'yov. | "Role of exchange<br>interaction in self-<br>consistent calculations of<br>endohedral fullerenes".                     | Paper  | Nuclear Inst. and<br>Methods in Physics<br>Research B, Vol. 279,<br>pp. 202-204, 2012             | 4  |
| 588. | A. V. Verkhovtsev, R.<br>G. Polozkov,<br>V. K. Ivanov,<br>A. V. Korol,<br>A. V. Solov'yov | "Self-Consistent Yartree-<br>Fock Approach to<br>Electronic Structure of<br>Endohedral Fullerene<br>Ar@C60",           | Paper  | Fullerenes,<br>Nanotubes and<br>Carbon<br>Nanostructures,<br>20:4-7, 382-385, 2012                | 4  |

|      |                                                                                                                                                                                                       |                                                                                                 |       |                                                          |   |
|------|-------------------------------------------------------------------------------------------------------------------------------------------------------------------------------------------------------|-------------------------------------------------------------------------------------------------|-------|----------------------------------------------------------|---|
| 589. | A. V. Verkhovtsev, R. G. Polozkov, V. K. Ivanov, A. V. Korol, A. V. Solov'yov.                                                                                                                        | "Hybridization-related correction to the jellium model for fullerenes".                         | Paper | J. Phys. B: At. Mol. Opt. Phys. <b>45</b> , 215101, 2012 | 8 |
| 590. | R. G. Polozkov, V. K. Ivanov, A. V. Korol, A. V. Solov'yov                                                                                                                                            | "Photodetachment of metal cluster negative ions within many-body theory"                        | Paper | European Phys. J. D, <b>66</b> , 287, 2012               | 7 |
| 591. | V. K. Dolmatov and D. A. Keating                                                                                                                                                                      | Xe 4d photoionization in Xe@C60, Xe@C240, and Xe@C60@C240                                       | paper | J. Phys.: Conf. Series, <b>388</b> , 022097, 2012        |   |
| 592. | S. B. Whitfield, R. Wehlitz, V. K. Dolmatov                                                                                                                                                           | The Ba5s photoionization in a correlation minimum energy region                                 | paper | J. Phys.: Conf. Series, <b>388</b> , 022008, 2012        |   |
| 593. | V. K. Dolmatov and D. A. Keating                                                                                                                                                                      | 5s correlation confinement resonances in Xe-endo-fullerenes                                     | paper | J. Phys.: Conf. Series, <b>388</b> , 022010, 2012        |   |
| 594. | V. K. Dolmatov, J. L. King, J. C. Oglesby                                                                                                                                                             | Diffuse versus square-well confining potentials in modelling A@C60 atoms                        | paper | J. Phys. B, <b>45</b> , 105102, 2012                     | 6 |
| 595. | V. K. Dolmatov and J. L. King                                                                                                                                                                         | Atomic swelling upon compression                                                                | paper | J. Phys. B, <b>45</b> , 0225003, 2012                    | 5 |
| 596. | D. Guènot, K. Klünder, C. L. Arnold, D. Kroon, J. M. Dahlström, M. Miranda, T. Fordell, M. Gisselbrecht, P. Johnsson, J. Mauritsson, E. Lindroth, A. Maquet, R. Taïyeb, A. L'Huillier, A. S. Kheifets | Photoemission time-delay measurements and calculations close to the 3s ionization minimum in Ar | paper | Phys. Rev. A <b>85</b> , 053424, 2012                    |   |
| 597. | I. Bray, D. V. Fursa, A. S. Kadyrov, A. T. Stelbovics, A. S. Kheifets                                                                                                                                 | Electron- and photon-impact atomic ionization                                                   | paper | Physics Reports <b>520</b> , 135, 2012                   |   |

|      |                                                                                                                                                                                                                                                                                                                            |                                                                                                                                                                                                                 |       |                                                                                               |    |
|------|----------------------------------------------------------------------------------------------------------------------------------------------------------------------------------------------------------------------------------------------------------------------------------------------------------------------------|-----------------------------------------------------------------------------------------------------------------------------------------------------------------------------------------------------------------|-------|-----------------------------------------------------------------------------------------------|----|
| 598. | S. K. Semenov,<br>K. Kreidi, T. Jahnke, Th.<br>Weber, T. Havermeier,<br>R. E. Grisenti, X. Liu,<br>Y. Morisita,<br>L. Ph. H. Schmidt, M.<br>Schöffler,<br>M. Odenweller, N.<br>Neumann, L. Foucar, J.<br>Titze, B. Ulrich, F.<br>Sturm, H. K. Kim, K.<br>Ueda, A. Czasch, O.<br>Jagutzki,<br>N. A. Cherepkov,<br>R. Dörner | Interatomic Coulombic<br>decay of fixed-in-space<br>neon dimers                                                                                                                                                 | paper | Phys. Rev A, <b>85</b> ,<br>043421, 2012                                                      |    |
| 599. | Z. Chen,<br>A. Msezane                                                                                                                                                                                                                                                                                                     | Photoabsorption<br>Spectrum of the Xe@C60<br>Endohedral Fullerene                                                                                                                                               | Paper | The European<br>Physical Journal D<br><b>66</b> , 7, 2012                                     |    |
| 600. | Z. Chen,<br>A. Msezane                                                                                                                                                                                                                                                                                                     | Effect of C <sub>60</sub> Giant<br>Resonance on the<br>Photoabsorption of<br>Encaged Atoms.                                                                                                                     | Paper | Phys. Rev.A <b>86</b> , 6,<br>2012                                                            |    |
| 601. | Zhifan Chen and Alfred<br>Z. Msezane                                                                                                                                                                                                                                                                                       | Photoionization of Xe and<br>Xe@C60                                                                                                                                                                             | Talk  | J. of Phys.:<br>Conference Series<br><b>388</b> , 022075, 2012                                |    |
| 602. | R. G. Polozkov,<br>V. K. Ivanov,<br>A. V. Verkhovtsev, A.<br>V. Korol,<br>A. V. Solov'yov..                                                                                                                                                                                                                                | "New applications of the<br>jellium model for the<br>study of atomic clusters"                                                                                                                                  | Paper | Journal of Physics:<br>Conference Series<br><b>438</b> , 012009, 2013                         | 11 |
| 603. | G B Sushko,<br>V G Bezchastnov,<br>A V Korol,<br>W. Greiner,<br>A V Solov'yov,<br>R G Polozkov,<br>V K Ivanov                                                                                                                                                                                                              | "Simulations of electron<br>channeling in bent silicon<br>crystal".                                                                                                                                             | Paper | Journal of Physics:<br>Conference Series<br><b>438</b> (2013) 012019<br>(10 pages)/           | 10 |
| 604. | A.N. Ipatov<br>V.K. Ivanov<br>R.G. Polozkov                                                                                                                                                                                                                                                                                | Influence of many-particle<br>correlations on the<br>stability of electron-<br>positron clusters<br>(In Russian: Влияние<br>многочастичных<br>корреляций на<br>стабильность электрон-<br>позитронных кластеров) | Paper | JETP, 2013, Vol. 117,<br>No. 4, pp. 631–635<br>(ЖЭТФ, т.144,<br>вып.4, стр. 727–732,<br>2013) | 6  |

|      |                                                                                      |                                                                                                             |       |                                                                                                                    |    |
|------|--------------------------------------------------------------------------------------|-------------------------------------------------------------------------------------------------------------|-------|--------------------------------------------------------------------------------------------------------------------|----|
| 605. | A.N. Ipatov<br>V.K. Ivanov<br>R.G. Polozkov                                          | "On stability of nanoscale electron- positron droplets"                                                     | Paper | St. Petersburg State Polytechnical University Journal. Physics and Mathematics. 2013. No. 4-2 (182), pp. 154 – 163 | 10 |
| 606. | M. Ya. Amusia,<br>L. V. Chernysheva,<br>V. G. Yarzhemsky                             | On the photoionization in the hard X-ray region                                                             | Paper | Pis'ma v ZhETP, <b>97</b> , 12, 2013; JETP Letters, Vol. 97, No. 12, pp. 704–707, 2013                             | 4  |
| 607. | M. Ya. Amusia,<br>V. K. Dolmatov,<br>L. V. Chernysheva                               | Electron elastic scattering off a semifilled shell atom: the Mn atom                                        | paper | Phys. Rev. A, <b>88</b> , 042706-1-7, 2013                                                                         | 7  |
| 608. | V. K. Dolmatov                                                                       | Confinement-induced orbital breathing, fusion, fission and re-ordering in semifilled shell atoms            | paper | J. Phys. B Vol.46 095005 (6pp), 2013                                                                               | 6  |
| 609. | D. G. Green and<br>G. F. Gribakin                                                    | Positron scattering and annihilation in hydrogenlike ions                                                   | paper | Phys. Rev. A <b>88</b> , 032708, 2013                                                                              |    |
| 610. | E. Sokell,<br>P. Bolognesi,<br>A. Kheifets,<br>Igor Bry, S Safgren<br>L. Avaldi      | Signature of two-electron interference in angular resolved double photoionization of Mg                     | paper | Phys. Rev. Lett. <b>110</b> , 083001, 2013                                                                         |    |
| 611. | A. S. Kheifets                                                                       | Time delay in valence shell photoionization of noble gas atoms                                              | paper | Phys. Rev. A <b>87</b> , 063404, 2013                                                                              |    |
| 612. | M. Ya. Amusia and L.<br>V. Chernysheva                                               | Comment on "Photoionization of endohedral atoms using R-matrix methods: application to Xe@C <sub>60</sub> " | paper | Phys. Rev A, <b>89</b> , 057401, 2014                                                                              |    |
| 613. | V. K. Dolmatov,<br>M. Ya. Amusia,<br>L. V. Chernysheva                               | Electron elastic scattering off a spin-polarized Cr atom                                                    | paper | Phys. Rev. A, <b>90</b> , 032717, 2014                                                                             |    |
| 614. | M. Ya. Amusia,<br>L. V. Chernysheva,<br>E. G. Drukarev                               | Explanation of the recent results on photoionization of endohedral atoms                                    | paper | JETP Letters, <b>100</b> , 9, 619-622, 2014                                                                        | 4  |
| 615. | M. Ya. Amusia,<br>L. V. Chernysheva, V.<br>G. Yarzhemsky                             | On photoionization in the hard X-ray region                                                                 | Paper | J. Phys.: Conf. Ser., v.488, 2 Art No: #022044, 2014                                                               | 1  |
| 616. | R. G. Polozkov,<br>V. K. Ivanov,<br>G. B. Sushko,<br>A. V. Korol<br>A. V. Solov'yov. | "Radiation Emission by Electrons Channeling in Bent Silicon Crystals".                                      | Paper | European Phys. J. D <b>68</b> : 268 – (1-9), 2014                                                                  | 9  |

|      |                                                                                                                                                                                  |                                                                                                                        |       |                                                  |    |
|------|----------------------------------------------------------------------------------------------------------------------------------------------------------------------------------|------------------------------------------------------------------------------------------------------------------------|-------|--------------------------------------------------|----|
| 617. | A. N. Ipatov,<br>V. K. Ivanov,<br>R. G. Polozkov                                                                                                                                 | "On stability of nanoscale electron- positron droplets".                                                               | Paper | European Phys. J. D 68: 249 – (1-6), 2014        | 6  |
| 618. | V. K. Dolmatov,<br>M. B. Cooper<br>M. E. Hunter                                                                                                                                  | Electron elastic scattering off endohedral fullerenes A@C <sub>60</sub> : the initial insight                          | paper | J. Phys. B, Vol.47, 115002, 2014                 | 6  |
| 619. | P. C. Deshmukh,<br>A. Mandal, S. Saha, A. S. Kheifets,<br>V. K. Dolmatov,<br>S. T. Manson                                                                                        | Attosecond time delay in the photoionization of endohedral atoms A@C <sub>60</sub> : A probe of confinement resonances | paper | Phys. Rev. A, Vol. 89, 053424, 2014              | 4  |
| 620. | I. I. Fabrikant and<br>G. F. Gribakin                                                                                                                                            | Positronium-atom scattering at low energies                                                                            | paper | Phys. Rev. A 90, 052717, 2014                    |    |
| 621. | E. Sokell,<br>P. Bolognesi,<br>A. Kheifets, I. Bray, S. Safgren<br>L. Avaldi                                                                                                     | Double photoionization of Mg studied by electron-electron coincidence experiments                                      | paper | Phys. Rev. A 89, 013413, 2014                    |    |
| 622. | E. P. Månsson,<br>D. Guènot,<br>C. L. Arnold,<br>D. Kroon, S. Kasper,<br>J. M. Dahlström,<br>E. Lindroth,<br>A. Kheifets,<br>A. L'Huillier,<br>S. L. Sorensen<br>M. Gisselbrecht | Double Ionization of Xenon Probed on the Attosecond Time Scale                                                         | paper | Nature Physics <b>10</b> , 207, 2014             |    |
| 623. | P. C. Deshmukh,<br>A. Mandal, S. Saha, A. S. Kheifets,<br>V. K. Dolmatov<br>S T Manson                                                                                           | Attosecond time delay and confinement resonances in photoionization of endohedral atoms: Xe@C <sub>60</sub>            | paper | Phys. Rev. A <b>89</b> , 053424, 2014            |    |
| 624. | A. Mandal, J. Jose, S. Saha, R. Varma, P. C. Deshmukh,<br>A. S. Kheifets,<br>V. K. Dolmatov<br>S T Manson                                                                        | Relativistic effects in photoionization time delay near the Cooper minimum of noble gas atoms                          | paper | Phys. Rev. A <b>90</b> , 053406, 2014            |    |
| 625. | Qianxia Wang , S Sheinerman and F Robicheaux                                                                                                                                     | Comparison of different quantum mechanical methods for inner atomic shell photo-ionization followed by Auger decay     | Paper | J. Phys. B: At. Mol. Opt. Phys. 47 (2014) 215003 | 10 |
| 626. | Caryn Palatchi,<br>M. Dahlström,<br>A. S. Kheifets,<br>P. Agostini<br>L. F. DiMauro                                                                                              | Atomic Delay in Helium, Neon, Argon and Krypton                                                                        | paper | J. Phys. B <b>47</b> , 245003, 2014              |    |

|      |                                                                                                                                                                                                          |                                                                                                              |       |                                                                                            |    |
|------|----------------------------------------------------------------------------------------------------------------------------------------------------------------------------------------------------------|--------------------------------------------------------------------------------------------------------------|-------|--------------------------------------------------------------------------------------------|----|
| 627. | D. Guènot,<br>D. Kroon, M. Kotur, E. Balogh,<br>E. W. Larsen,<br>J. M. Dahlström,<br>. Mauritsson,<br>M. Gisselbrecht,<br>E. Lindroth,,<br>K. Varju,<br>C. L. Arnold,<br>A. S. Kheifets<br>A. L'Huillier | Measurements of relative photoemission time delays in noble gas atoms                                        | paper | J. Phys. B <b>47</b> , 245602, 2014                                                        |    |
| 628. | M. Ya. Amusia and L. V. Chernysheva                                                                                                                                                                      | On the behavior of scattering phases in collisions of electrons with multi-atomic objects                    | paper | Pis'ma v ZhETF, <b>101</b> , 7, 556-559, 2015, JETP Letters, <b>101</b> , 7, 503-506, 2015 | 4  |
| 629. | M. Ya. Amusia,<br>E. G. Drukarev,<br>L. V. Chernysheva                                                                                                                                                   | Influence of the inner shell electrons on photoionization of outer shells                                    | Paper | European Physical Journal, D, <b>69</b> , 245, November 2015                               |    |
| 630. | M. Ya. Amusia and L. V. Chernysheva                                                                                                                                                                      | On the additivity of scattering phases in collisions of electrons on endohedrals                             | Paper | Journal of Physics B: Conference Series, <b>635</b> , 072004, 2015                         |    |
| 631. | M. Ya. Amusia,<br>E. G. Drukarev,<br>L. V. Chernysheva                                                                                                                                                   | Interelectron correlations in photoionization of outer shells near inner shell thresholds                    | Paper | Journal of Physics B: Conference Series, <b>635</b> , 092012, 2015                         |    |
| 632. | V. K. Dolmatov,<br>C. Bayens,<br>M. B. Cooper,<br>M. E. Hunter                                                                                                                                           | Electron elastic scattering and low-frequency bremsstrahlung on A@C60: A model static-exchange approximation | Paper | Physical Review A, Vol. <b>91</b> , 6, 0622703, 2015.                                      | 12 |
| 633. | V. K. Dolmatov, M. Cooper, and M. Hunter                                                                                                                                                                 | e + C60 and e + A@C60 elastic scattering versus the parameters of the C60-model-square-well potential        | Paper | J. Phys.: Conf. Ser. Vol.635, 112008, 2015.                                                | 1  |
| 634. | V. K. Dolmatov,<br>A. S. Kheifets,<br>P. C. Deshmukh,<br>S. T. Manson                                                                                                                                    | Attosecond time delay in the photoionization of Mn in the region of the 3p→3d giant resonance                | Paper | Physical Review A, <b>91</b> , 053415, 2015.                                               | 7  |
| 635. | V. K. Dolmatov,<br>J. L. King,<br>J. C Oglesby                                                                                                                                                           | Corrigendum: Diffuse versus square-well potentials in modelling A@C60 atoms                                  | Paper | J. Phys. B. <b>48</b> , 6, 069501, 2015                                                    | 1  |
| 636. | J. P. Connerade and V. K. Dolmatov                                                                                                                                                                       | "C60 spin-charging" with an eye on a quantum computer                                                        | Paper | J. Phys. B, <b>48</b> , 015007, 2015                                                       | 3  |

|      |                                                                                                                                                                                                    |                                                                                                                         |       |                                                                                                                                                                                     |   |
|------|----------------------------------------------------------------------------------------------------------------------------------------------------------------------------------------------------|-------------------------------------------------------------------------------------------------------------------------|-------|-------------------------------------------------------------------------------------------------------------------------------------------------------------------------------------|---|
| 637. | V. K. Dolmatov,<br>A. S. Kheifets,<br>P. C. Deshmukh<br>S T Manson                                                                                                                                 | Attosecond time delay in<br>3d-photoionization of Mn<br>in the region of a giant 3p<br>→ 3d autoionization<br>resonance | Paper | Phys. Rev. A 91,<br>053415, 2015                                                                                                                                                    |   |
| 638. | M. Braune,<br>G. Hartmann,<br>M. Ilchen, A. Kniee, T.<br>Lischke,<br>A. Reinköster,<br>A. Meissner,<br>S. Deinert, L. Glaser, O.<br>Al-Dossary,<br>A. Ehresmann,<br>A. S. Kheifets,<br>J. Viefhaus | Electron angular<br>distributions of noble<br>gases in sequential two-<br>photon double ionization                      | Paper | J. Mod. Optics, 2015                                                                                                                                                                |   |
| 639. | V. K. Dolmatov,<br>M. Ya. Amusia<br>L. V. Chernysheva                                                                                                                                              | Electron elastic scattering<br>off A@C60: The role of<br>atomic polarization under<br>confinement                       | Paper | Phys. Rev. A <b>92</b> ,<br>042709(7), 2015                                                                                                                                         | 7 |
| 640. | R. Guillemin, S.<br>Sheinerman, R. Puttner,<br>T. Marchenko, G.<br>Goldsztejn, L. Journel,<br>R. K. Kushawaha, D.<br>Ceolin, M. N.<br>Piancastelli, and M.<br>Simon,                               | Postcollision interaction<br>effects in KLL Auger<br>spectra following argon<br>1s photoionization                      | Paper | Phys. Rev. A <b>92</b> ,<br>012503(8), 2015                                                                                                                                         | 8 |
| 641. | S. Sheinerman, P.<br>Lablanquie, L. Andric,<br>K. Ito, J. Palaudoux, S-<br>M. Huttula, M. Huttula,<br>K. Jänkälä, J. Soronen, J-<br>M. Bizau, S. Guilbaud,<br>D. Cubaynes, and F.<br>Penent        | Post-collision interaction<br>in Potassium 3s<br>photoionization                                                        | Talk  | Journal of Physics:<br>Conference Series<br>635 (2015) 092086                                                                                                                       | 1 |
| 642. | M. Ya. Amusia,<br>E. G. Drukarev,<br>L. V. Chernysheva                                                                                                                                             | Intershell correlations in<br>photoionization of outer<br>shells                                                        | Talk  | Nuclear Instruments<br>and Methods in<br>Physics Research,<br>Section B: Beam<br>Interaction with<br>Materials and<br>Atoms, <b>369</b> , 15<br>February 2016,<br>Pages 21–23, 2016 | 3 |



|      |                                                                                    |                                                                                                                                                      |       |                                                                                      |    |
|------|------------------------------------------------------------------------------------|------------------------------------------------------------------------------------------------------------------------------------------------------|-------|--------------------------------------------------------------------------------------|----|
| 643. | M. Ya. Amusia and L. V. Chernysheva                                                | The role of fullerene shell upon stuffed atom polarization potential                                                                                 | Paper | Pis'ma v ZhETF, <b>103</b> , 4, 286-290, JETP Letters, <b>103</b> , 4, 260-264, 2016 | 5  |
| 644. | L Gomis, I G Faye, S Diallo1, M S Tall, I Diedhiou, A Hibbert, C A Daul C S Diatta | Length and velocity form calculations of generalized oscillator strengths of dipole, quadrupole and monopole excitations of argon                    | Paper | Physa Scripta <b>91</b> , 015401, 2016                                               | 12 |
| 645. | E. G. Drukarev, M. Ya. Amusia, and L. V. Chernysheva                               | Role of electronic shell in the double beta decay                                                                                                    | Paper | Phys. Rev. C, <b>94</b> , 035504, 2016                                               |    |
| 646. | E. G. Drukarev, M. Ya. Amusia, L. V. Chernysheva                                   | Internal energy loss of the electrons ejected in neutrinoless double $\beta$ decay                                                                   | Paper | Few Body Systems, <b>58</b> ,:1-4, 2017                                              | 4  |
| 647. | V. K. Dolmatov, M. Ya. Amusia, L. V. Chernysheva                                   | The effects of target polarization in elastic scattering of electrons by endohedral A@C <sub>60</sub>                                                | Paper | Phys. Rev. A <b>95</b> , 012709, 2017                                                |    |
| 648. | M. Ya. Amusia, L. V. Chernysheva                                                   | Low-energy positron scattering upon endohedrals                                                                                                      | Paper | Pis'ma v ZhETF, <b>106</b> , 1, 3-7, JETP Letters, <b>106</b> , 1, 1-6, 2017         |    |
| 649. | V. K. Dolmatov, M. Ya. Amusia, L. V. Chernysheva                                   | Angle-resolved e <sup>-</sup> + C <sub>60</sub> elastic scattering cross section versus Ramsauer minima in partial elastic scattering cross sections | Paper | Journal of Physics: Conference Series, <b>875</b> , 062045, 2017                     | 1  |
| 650. | V. K. Dolmatov                                                                     | Angle-differential elastic electron scattering off Mn                                                                                                | Paper | Physical Review A Vol. 96, No. 5, 052704 (6pp), 2017.                                | 6  |
| 651. | V. K. Dolmatov                                                                     | Impact of fullerene polarizability on Wigner time delay in photodetachment of fullerene anions C <sup>(-)N</sup>                                     | Paper | Journal of. Physics: Conf. Ser. Vol. 875, p.022013, 2017.                            | 1  |
| 652. | V. K. Dolmatov                                                                     | On e <sup>-</sup> + Mn elastic scattering at $\hat{\mu} = 20$ eV impact energy                                                                       | Paper | Journal of Physics: Conf. Series, Vol.875, p.052044, 2017.                           | 1  |
| 653. | A. C. Edwards, C. G. Lane, V. K. Dolmatov                                          | Spin-polarized electrons upon nondipole photodetachment of fullerene anions                                                                          | Paper | Journal of Physics: Conf. Series, Vol. 875, p.032032, 2017.                          |    |

|      |                                                        |                                                                                                                                                   |         |                                                                                                                                         |    |
|------|--------------------------------------------------------|---------------------------------------------------------------------------------------------------------------------------------------------------|---------|-----------------------------------------------------------------------------------------------------------------------------------------|----|
| 654. | M. Ya. Amusia,<br>L. V. Chernysheva                    | Bosonic atoms                                                                                                                                     | Paper   | JETP Letters, <b>107</b> , 2, 91-95, Pis'ma v ZhETF, <b>107</b> , 2, 99-103, 2018                                                       | 5  |
| 655. | E. G. Drukarev,<br>M. Ya. Amusia,<br>L. V. Chernysheva | Internal energy loss of the electrons ejected in neutrinoless double $\beta$ decay                                                                | Paper   | Proceedings of the 23 <sup>rd</sup> European Conference on Few-Body Problems in Physics, Springer-Verlag GmbH Austria, pp. 63-66, 2018. | 4  |
| 656. | M. Ya. Amusia,<br>L. V. Chernysheva                    | Estimation of the integral role of Intershell correlations in heavy atoms                                                                         | Paper   | JETP Letters, <b>108</b> , 7, 435-438, 2018, Pis'ma v ZhETF, <b>108</b> , 7, 466-469, 2018                                              | 4  |
| 657. | M. Ya. Amusia,<br>L. V. Chernysheva                    | Photoionization of Endohedrals with account of fullerenes polarization                                                                            | Paper   | JETP Letters, <b>109</b> , 6, 345-349, Pis'ma v ZhETF, <b>109</b> , 6, 355-359, 2019                                                    | 5  |
| 658. | M. Ya. Amusia,<br>V. K. Dolmatov,<br>L. V. Chernysheva | Angle-differential elastic electron scattering off C <sub>60</sub> : A simple semi-empirical theory versus experiment                             | Paper   | J. of Phys. B, <b>52</b> (8), 085201, 2019                                                                                              | 6  |
| 659. | M. Ya. Amusia,<br>L. V. Chernysheva,<br>S. K. Semenov  | Photoionization of Molecular Endohedrals                                                                                                          | Paper   | JETP Letters, <b>110</b> , 2, 102-106, Pis'ma v ZhETF, <b>110</b> , 2, 85-89, 2019                                                      | 5  |
| 660. | V. K. Dolmatov,<br>D A. Edwards                        | Role of polarizability of a CN fullerene cage in A@C <sub>N</sub> photoionization and e <sup>-</sup> - C <sub>N</sub> scattering: The size effect | Paper   | Journal of Physics B: At. Mol. Opt. Phys. Vol.52, 105001 2019.                                                                          | 6  |
| 661. | V. K. Dolmatov,<br>M. Ya. Amusia,<br>L. V. Chernysheva | On the e <sup>-</sup> - C <sub>60</sub> elastic angle-differential scattering cross section                                                       | Paper   | Journal of Physics: Conference Series <b>1412</b> , 182011, 2020.                                                                       | 1  |
| 662. | M. Ya. Amusia, L. V. Chernysheva                       | Photoionization of endohedrals: complete semi-phenomenological approach                                                                           | Paper   | Journal of Physics: Conference Series <b>1412</b> , 202025, 2020                                                                        | 1  |
| 663. | M. Ya. Amusia                                          | Photon Absorption and Electron Scattering by Endohedrals                                                                                          | Chapter | <i>Discoveries at the Frontiers of Science</i> , Chap. 16, ed. J. Kirsch et al, Springer Nature Switzerland AG, pp. 225-238, 2020       | 14 |

|      |                                                         |                                                                                          |         |                                                                                                                                                                                                                                                                                                                                                                  |    |
|------|---------------------------------------------------------|------------------------------------------------------------------------------------------|---------|------------------------------------------------------------------------------------------------------------------------------------------------------------------------------------------------------------------------------------------------------------------------------------------------------------------------------------------------------------------|----|
| 664. | M. Ya. Amusia,<br>A. S. Baltenkov,<br>L. V. Chernysheva | Modification of<br>endohedral potential after<br>instant ionization of the<br>inner atom | Paper   | JETP Letters, <b>111</b> , 1,<br>12-18, Pis'ma v<br>ZhETF, <b>111</b> , 1, 18-23,<br>2020                                                                                                                                                                                                                                                                        | 6  |
| 665. | M. Ya. Amusia                                           | Many-Body Theory of<br>Atomic Structure and<br>Processes                                 | Chapter | Handbook on<br>Atomic<br>spectroscopy, in:<br><i>Atomic, Molecular<br/>and Optical Physics<br/>Reference Book</i> , ed. G.<br>Drake and S. Shaun,<br>AIP Publishing,<br>Chapter 23, p. 287-<br>300, 2020                                                                                                                                                         | 14 |
| 666. | M. Ya. Amusia, L. V.<br>Chernysheva                     | On the Bosonic Atoms -<br>structure and processes                                        | Paper   | Springer<br>Proceedings in<br>Physics <b>238</b> , <i>Recent<br/>Progress in Few-Body<br/>Physics</i> , Proceedings<br>of the 22 <sup>nd</sup><br>International<br>Conference on Few-<br>Body Problem in<br>Physics, N. A. Orr,<br>M. Ploszajczak, F.<br>M. Marques, J.<br>Carbonell, Eds,<br>Springer, Nature<br>Switzerland, Chap<br>152, pp. 927-930,<br>2020 | 4  |
| 667. | M. Ya. Amusia,<br>L. V. Chernysheva                     | Intershell correlations in<br>endohedral atoms                                           | Paper   | Fullerenes,<br>Nanotubes and<br>Carbon<br>Nanostructures, <b>28</b> ,<br>3, Proceedings of the<br>14th International<br>Conference<br>"Advanced Carbon<br>Nanostructures"<br>(ACNS'2019),<br><a href="https://doi.org/10.1080/1536383X.2019.1686617">https://doi.org/10.1080/1536383X.2019.1686617</a> , 2020                                                    |    |
| 668. | M. Ya. Amusia, L. V.<br>Chernysheva                     | Time delay of<br>photoionization by<br>Endohedrals                                       | Paper   | JETP Letters, <b>112</b> , 4,<br>219-224, Pis'ma v<br>ZhETF, <b>112</b> , 4, 233-<br>239, 2020                                                                                                                                                                                                                                                                   | 7  |

|      |                                                                                          |                                                                                               |               |                                                                                                                                     |    |
|------|------------------------------------------------------------------------------------------|-----------------------------------------------------------------------------------------------|---------------|-------------------------------------------------------------------------------------------------------------------------------------|----|
| 669. | M. Ya. Amusia,<br>L. V. Chernysheva                                                      | Non-dipole effects in time delay of photoelectrons from atoms, negative ions, and endohedrals | Paper         | JETP Letters, <b>112</b> , 10, 673-679, Pis'ma v ZhETF, <b>112</b> , 10, 709-716, 2020                                              | 7  |
| 670. | V. K. Dolmatov                                                                           | Spin-Polarized Photoelectron Fluxes from Fullerene Anions                                     | Invited Paper | Atoms, Vol. 8, No.4, p.65 (14pp).<br><a href="https://doi.org/10.3390/atoms8040065">https://doi.org/10.3390/atoms8040065</a> . 2020 | 14 |
| 671. | A. W. Bray, D. Freeman, F. Naseem, V. K. Dolmatov and A. S. Kheifets                     | Correlation-enhanced high-order-harmonic-generation spectra of Mn and Mn <sup>+</sup>         | Paper         | Physical Review A, Vol. 101, No. 5, p.053415, 2020.                                                                                 | 5  |
| 672. | A. Müller, A. L. D. Kilcoyne, R. A. Phaneuf, K. Holste, S. Schippers, and A. S. Kheifets | Direct double ionization of the Ar <sup>+</sup> M shell by a single photon                    | Paper         | Phys. Rev. A 103, L031101 (2021)                                                                                                    | 5  |
| 673. | M. Ya. Amusia,<br>L. V. Chernysheva                                                      | Role of fullerene shell in time delay of photoelectrons from endohedrals.                     | paper         | In: Proceedings of the 15 <sup>th</sup> International conference Advance Carbon Nanostructures (ACNS'2021). p 196 (2021)            |    |
| 674. | M.Ya. Amusia,<br>V.K. Dolmatov,<br>L.V.Chernysheva                                       | Positron elastic scattering by a semifilled-shell atom.                                       | paper         | J. Phys. B: At. Mol. Opt. Phys., v.54, 185003 (2021)                                                                                |    |
